# Supplementary material
Source: PubMed Central journal article supplement (PMC7020663)
Supplement: NIHMS1555418-supplement-Supplemental_Materials.pdf [file NIHMS1555418-supplement-Supplemental_Materials.pdf]

# Tandem Mass Spectrum for $\gamma$ S: TGTK\*ITFYEDKNFQGR (QE data)

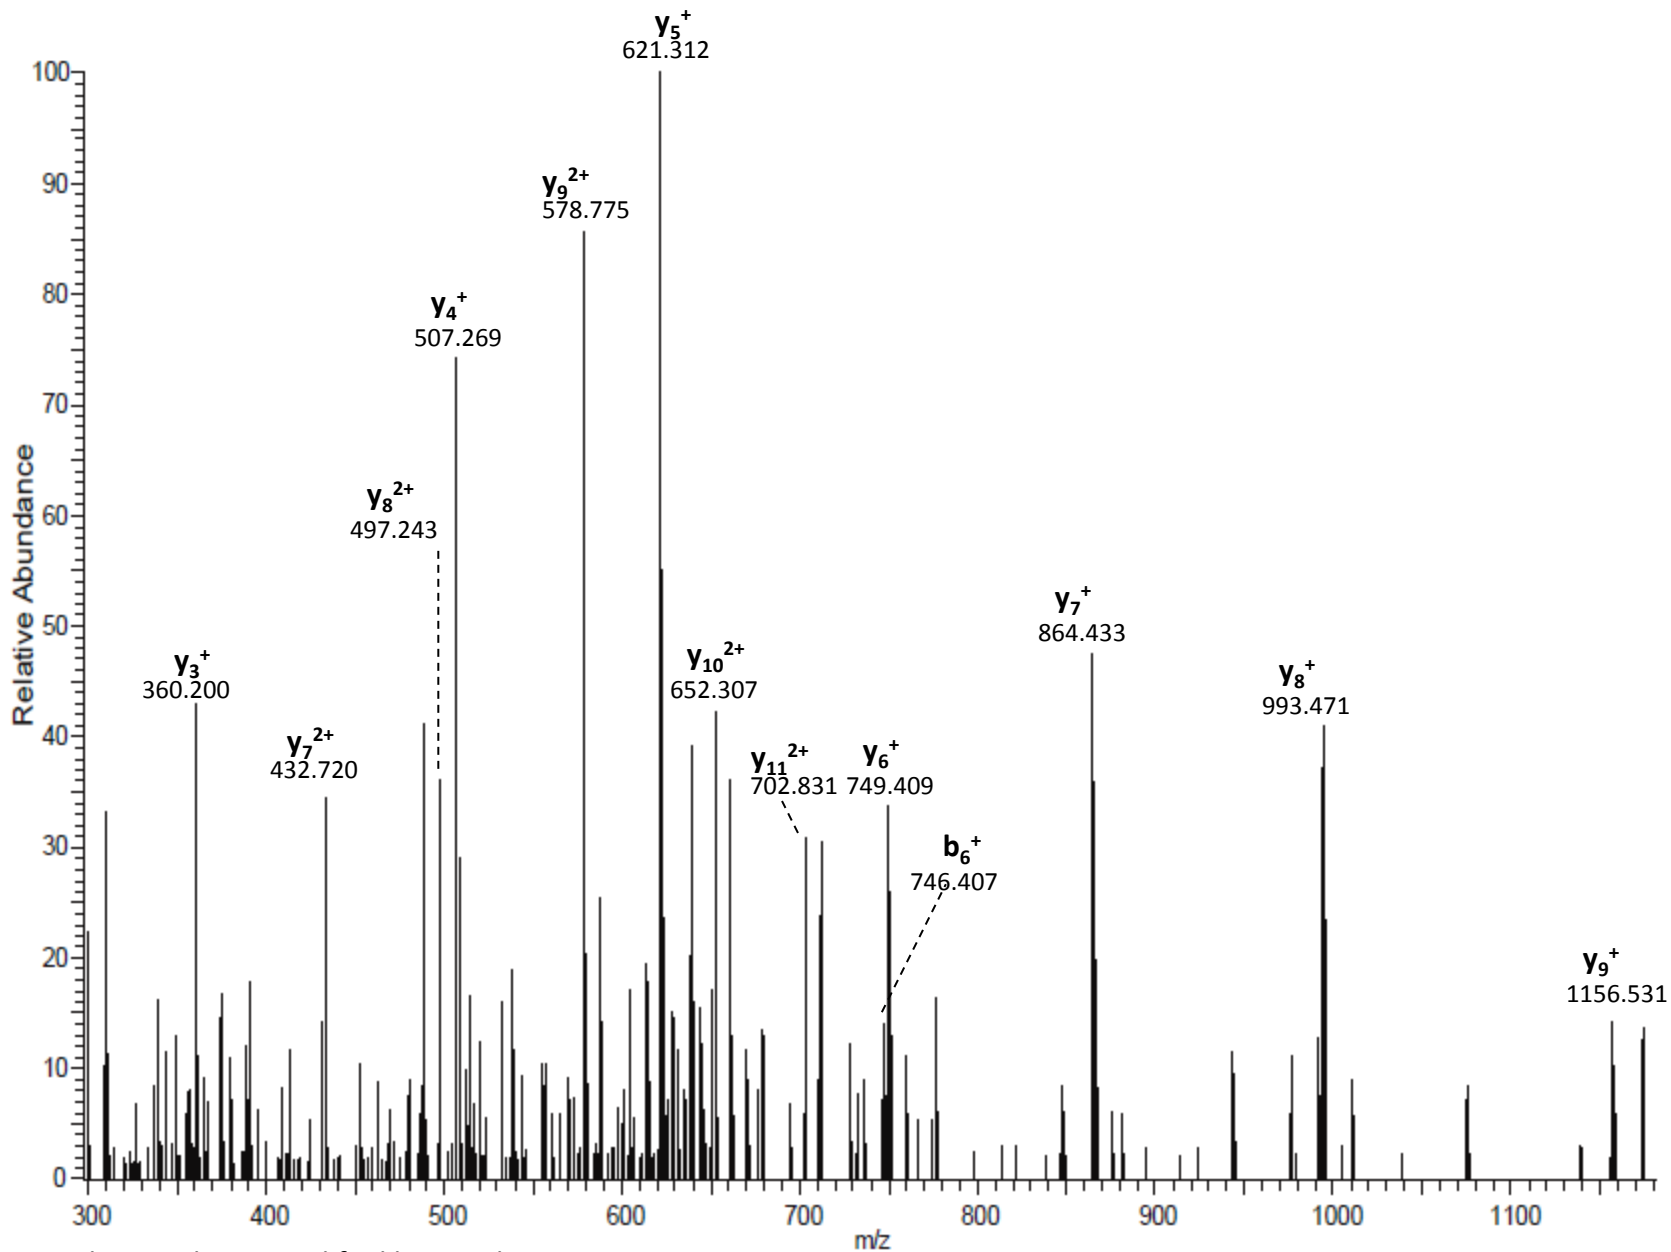

\* Indicates the site that is modified by CysGly

# Predicated and detected b- and y- ions for $\gamma$ S:TGTK\*ITFYEDKNFQGR (QE data)

| b ions |                  |                  |                   | y ions           |    |                  |                  |                   |                  |
|--------|------------------|------------------|-------------------|------------------|----|------------------|------------------|-------------------|------------------|
|        | Theoretical (+1) | Theoretical (+2) | Experimental (+1) | Experimental(+2) |    | Theoretical (+1) | Theoretical (+2) | Experimental (+1) | Experimental(+2) |
| 2      | 159.0764         | 80.0418          | 159.077           |                  | 1  | 175.119          | 88.063138        | 175.1197          |                  |
| 3      | 260.1241         | 130.5657         |                   |                  | 2  | 232.1404         | 116.573838       | 232.1411          |                  |
| 4      | 532.2726         | 266.6399         |                   |                  | 3  | 360.199          | 180.603138       | 360.2001          |                  |
| 5      | 645.3566         | 323.1819         |                   | 323.1782         | 4  | 507.2674         | 254.137338       | 507.2691          |                  |
| 6      | 746.4043         | 373.7058         | 746.4071          |                  | 5  | 621.3103         | 311.158788       | 621.3123          |                  |
| 7      | 893.4727         | 447.2400         |                   |                  | 6  | 749.4053         | 375.206288       | 749.4092          |                  |
| 8      | 1056.536         | 528.7716         |                   |                  | 7  | 864.4322         | 432.719738       | 864.4332          | 432.7201         |
| 9      | 1185.5786        | 593.2929         |                   |                  | 8  | 993.4748         | 497.241038       | 993.4714          | 497.243          |
| 10     | 1300.6056        | 650.8064         |                   |                  | 9  | 1156.5382        | 578.772738       | 1156.5312         | 578.7751         |
| 11     | 1428.7005        | 714.8539         |                   |                  | 10 | 1303.6066        | 652.306938       |                   | 652.307          |
| 12     | 1542.7435        | 771.8754         |                   |                  | 11 | 1404.6543        | 702.830788       |                   | 702.8311         |
| 13     | 1689.8119        | 845.4096         |                   |                  | 12 | 1517.7383        | 759.372788       |                   | 759.3711         |
| 14     | 1817.8705        | 909.4389         |                   |                  | 13 | 1789.8868        | 895.447038       |                   |                  |
| 15     | 1874.8919        | 937.9496         |                   |                  | 14 | 1890.9345        | 945.970888       |                   |                  |
|        |                  |                  |                   |                  | 15 | 1947.9559        | 974.481588       |                   |                  |

# Tandem Mass Spectrum for $\gamma$ S: ITFYEDK\*NFQGR (QE Data)

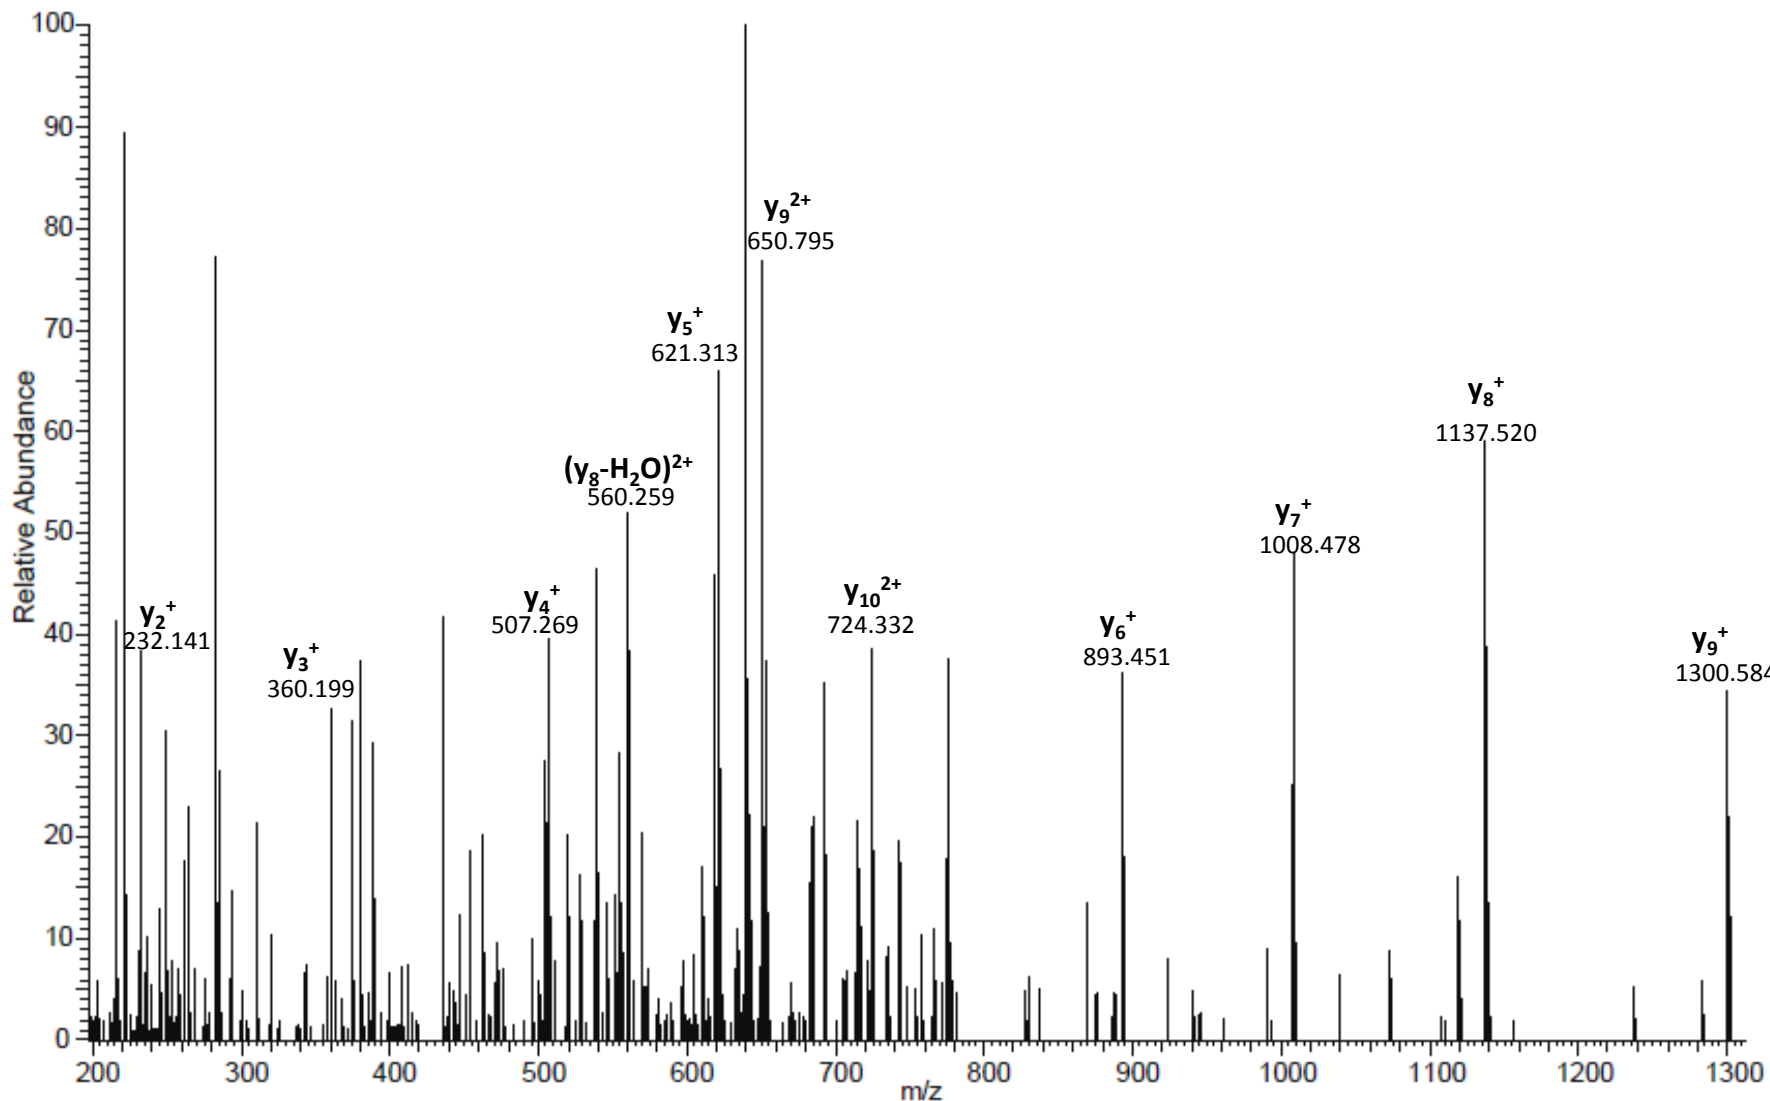

\* Indicates the site that is modified by CysGly

## Predicated and detected b- and y- ions for $\gamma$ S: ITFYEDK\*NFQGR (QE data)

| b ions |                  |                  |                   | y ions           |    |                  |                  |                   |                  |
|--------|------------------|------------------|-------------------|------------------|----|------------------|------------------|-------------------|------------------|
|        | Theoretical (+1) | Theoretical (+2) | Experimental (+1) | Experimental(+2) |    | Theoretical (+1) | Theoretical (+2) | Experimental (+1) | Experimental(+2) |
| 2      | 215.139          | 108.0731         | 215.1393          |                  | 1  | 175.119          | 88.063138        | 175.1194          |                  |
| 3      | 362.2074         | 181.6073         |                   |                  | 2  | 232.1404         | 116.573838       | 232.1409          |                  |
| 4      | 525.2708         | 263.1390         |                   |                  | 3  | 360.199          | 180.603138       | 360.1993          |                  |
| 5      | 654.3134         | 327.6603         |                   |                  | 4  | 507.2674         | 254.137338       | 507.2689          |                  |
| 6      | 769.3403         | 385.1738         |                   |                  | 5  | 621.3103         | 311.158788       | 621.3132          |                  |
| 7      | 1041.4888        | 521.2480         |                   |                  | 6  | 893.4588         | 447.233038       | 893.4512          | 447.2306         |
| 8      | 1155.5317        | 578.2695         |                   |                  | 7  | 1008.4857        | 504.746488       | 1008.4776         |                  |
| 9      | 1302.6001        | 651.8037         |                   |                  | 8  | 1137.5283        | 569.267788       | 1137.5197         |                  |
| 10     | 1430.6587        | 715.8330         |                   |                  | 9  | 1300.5917        | 650.799488       | 1300.5836         | 650.7946         |
| 11     | 1487.6801        | 744.3437         |                   | 744.3485         | 10 | 1447.6601        | 724.333688       |                   | 724.3319         |
|        |                  |                  |                   |                  | 11 | 1548.7078        | 774.857538       |                   | 774.8545         |

# Tandem Mass Spectrum for $\gamma$ S: AVHLPSGGQYK\*IQIFEK (QE data)

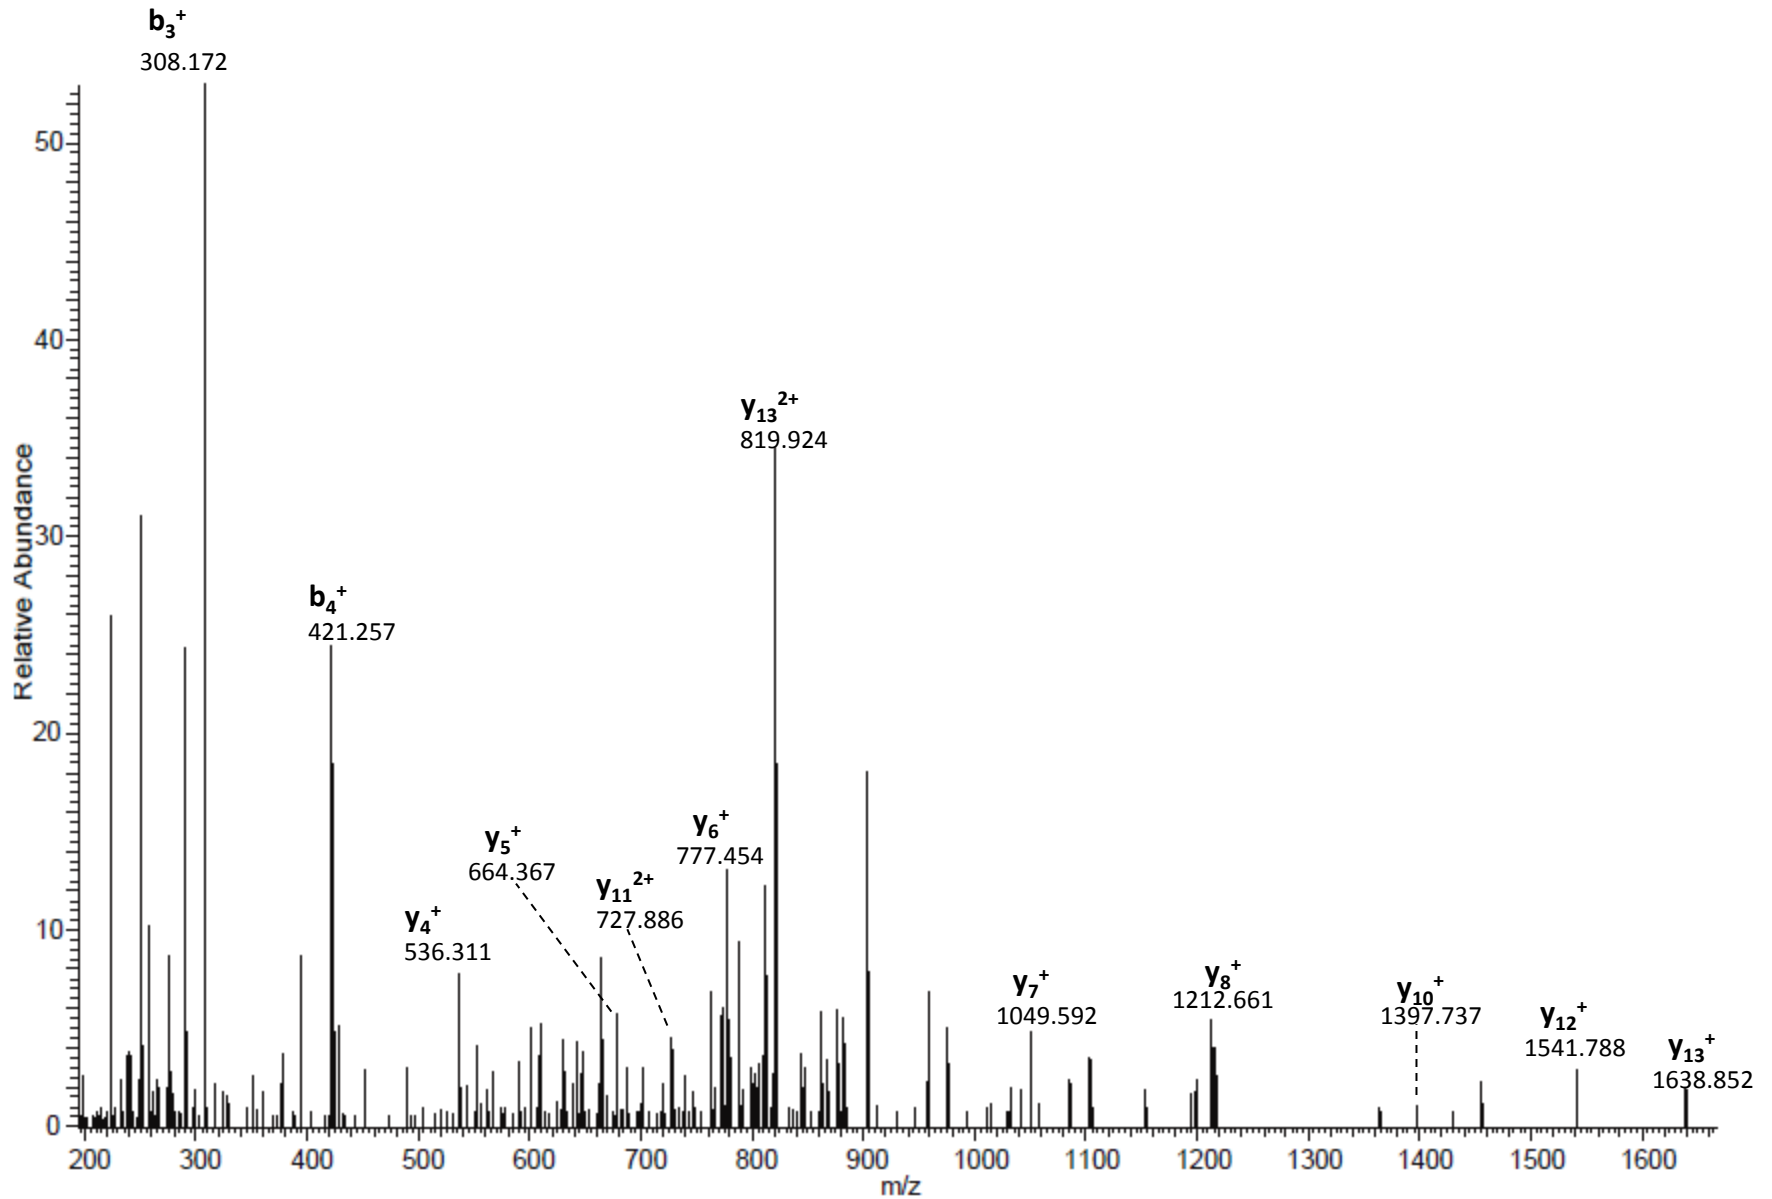

\* Indicates the site that is modified by CysGly

## b- and y- ions table for $\gamma$ S: AVHLPSGGQYK\*IQIFEK

| b ions |                  |                  |                   | y ions           |    |                  |                  |                   |                  |
|--------|------------------|------------------|-------------------|------------------|----|------------------|------------------|-------------------|------------------|
|        | Theoretical (+1) | Theoretical (+2) | Experimental (+1) | Experimental(+2) |    | Theoretical (+1) | Theoretical (+2) | Experimental (+1) | Experimental(+2) |
| 2      | 171.112886       | 0.0600           | 171.1133          |                  | 1  | 147.1128         | 74.060038        | 147.1133          |                  |
| 3      | 308.1717154      | 5.5895           | 307.1725          |                  | 2  | 276.1554         | 138.581338       | 276.1573          |                  |
| 4      | 421.2558211      | 1.1315           | 421.2567          |                  | 3  | 423.2238         | 212.115538       | 423.224           |                  |
| 5      | 518.3085259      | 6.579            |                   |                  | 4  | 536.3079         | 268.657588       | 536.3107          |                  |
| 6      | 605.3406303      | 1.739            |                   |                  | 5  | 664.3665         | 332.686888       | 664.3672          |                  |
| 7      | 662.362331       | 6.846            | 662.3585          |                  | 6  | 777.4505         | 389.228888       | 777.4536          |                  |
| 8      | 719.3835360      | 1.954            | 719.3804          |                  | 7  | 1049.599         | 525.303138       | 1049.5918         |                  |
| 9      | 847.4421424      | 2.247            | 847.4405          | 424.2276         | 8  | 1212.6623        | 606.834788       | 1212.6607         | 606.8325         |
| 10     | 1010.5054505     | 7.563            | 1010.5087         |                  | 9  | 1340.7209        | 670.864088       |                   |                  |
| 11     | 1282.6539641     | 8.306            |                   | 641.8301         | 10 | 1397.7423        | 699.374788       | 1397.7373         |                  |
| 12     | 1395.7379698     | 3.726            |                   | 698.3721         | 11 | 1454.7638        | 727.885538       | 1454.7733         | 727.8794         |
| 13     | 1523.7965762     | 4.019            |                   | 762.3975         | 12 | 1541.7958        | 771.401538       | 1541.7882         | 771.4            |
| 14     | 1636.8806818     | 9.439            |                   | 818.9512         | 13 | 1638.8486        | 819.927938       | 1638.852          | 819.9237         |
| 15     | 1783.949892      | 4.781            |                   |                  | 14 | 1751.9327        | 876.469988       |                   | 876.4658         |
| 16     | 1912.9916956     | 9.994            |                   |                  | 15 | 1888.9916        | 944.999438       |                   |                  |
|        |                  |                  |                   |                  | 16 | 1988.06          | 994.533638       |                   |                  |

# Tandem Mass Spectrum for $\gamma$ S: QYLLDK\*KEYR (QE data)

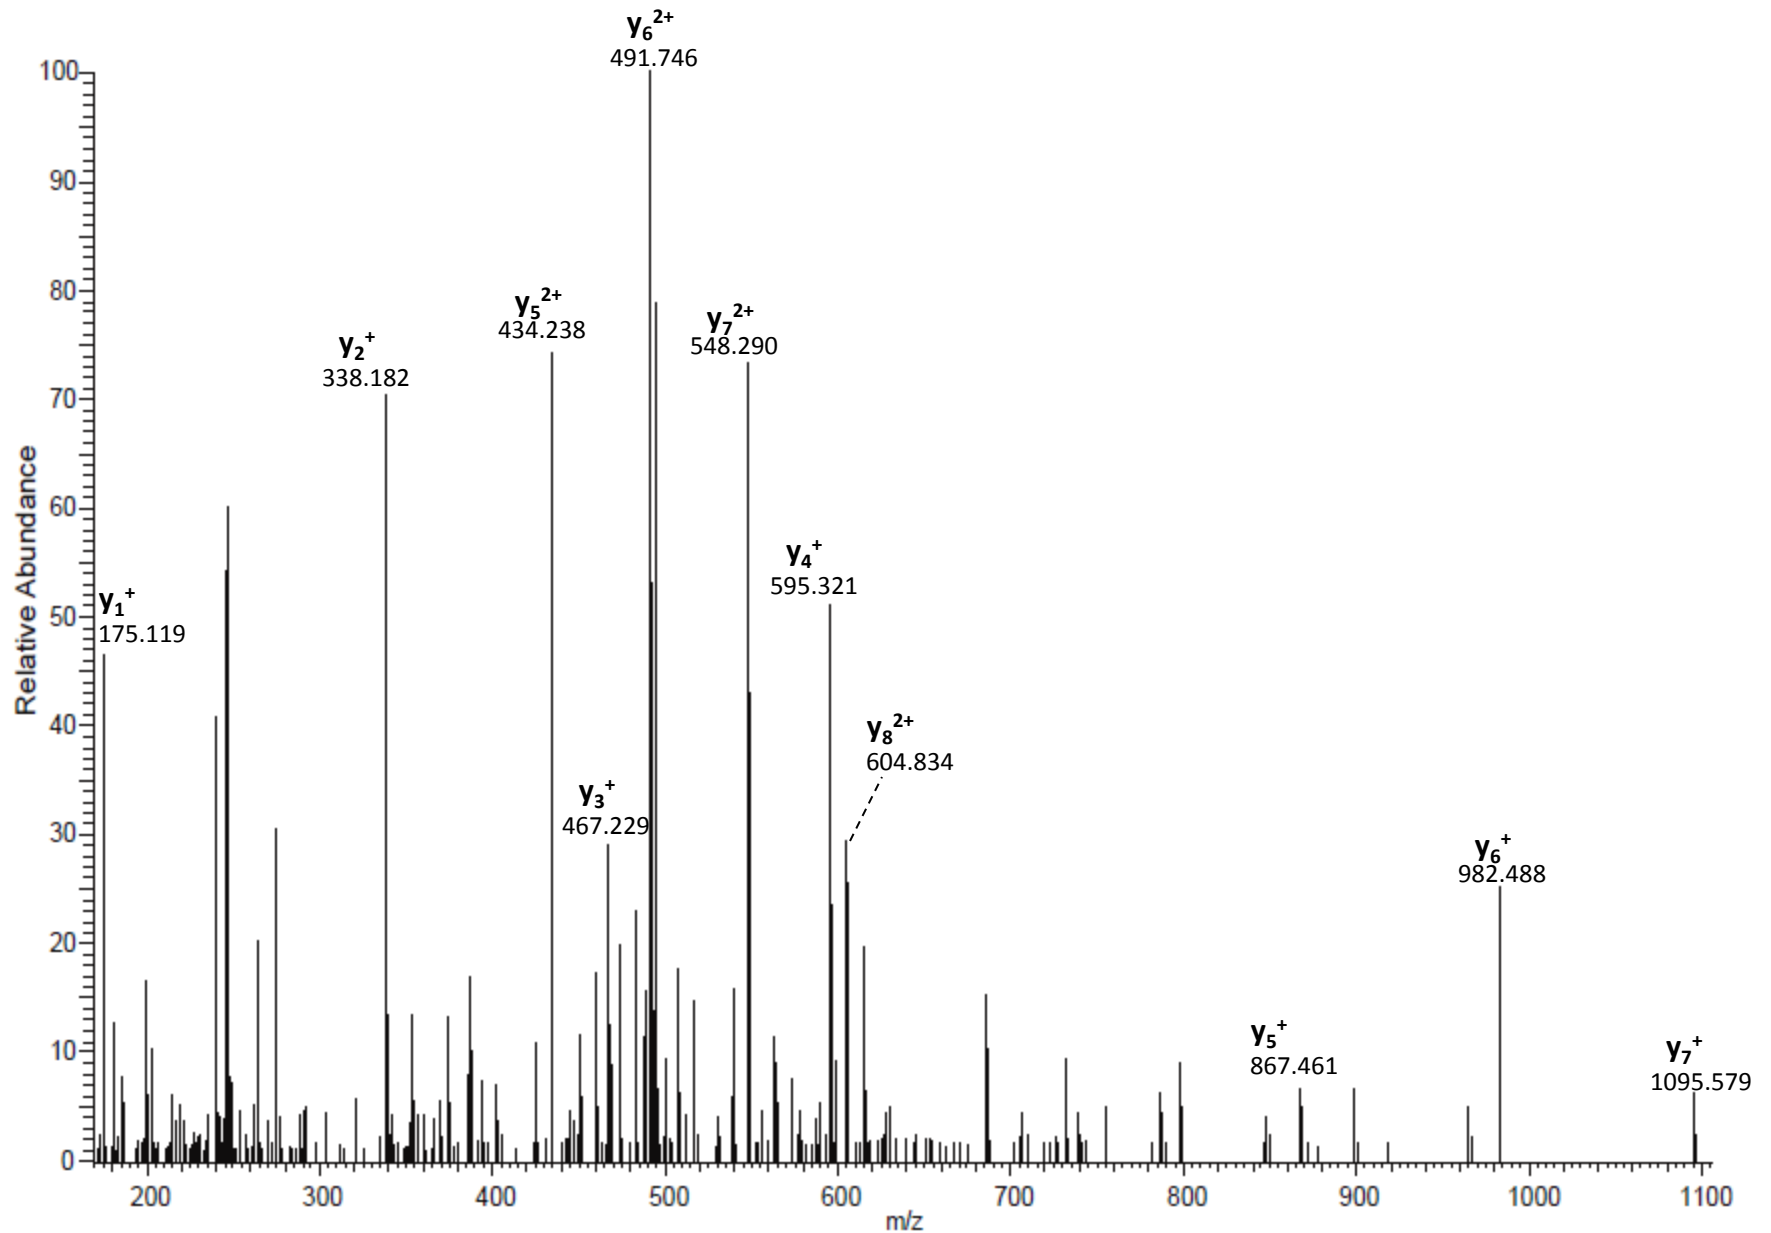

\* Indicates the site that is modified by CysGly

# Predicated and detected b- and y- ions for $\gamma$ S: QYLLDK\*KEYR (QE data)

| b ions |                  |                  |                   |                  | y ions |                  |                  |                   |                  |
|--------|------------------|------------------|-------------------|------------------|--------|------------------|------------------|-------------------|------------------|
|        | Theoretical (+1) | Theoretical (+2) | Experimental (+1) | Experimental(+2) |        | Theoretical (+1) | Theoretical (+2) | Experimental (+1) | Experimental(+2) |
| 2      | 292.1292         | 146.5682         | 292.1298          |                  | 1      | 175.119          | 88.063138        | 175.1194          |                  |
| 3      | 405.2132         | 203.1102         |                   |                  | 2      | 338.1823         | 169.594788       | 338.183           |                  |
| 4      | 518.2973         | 259.6523         |                   |                  | 3      | 467.2249         | 234.116088       | 467.2294          |                  |
| 5      | 633.3243         | 317.1658         |                   |                  | 4      | 595.3198         | 298.163538       | 595.3214          | 298.1655         |
| 6      | 905.4727         | 453.2400         |                   | 453.2421         | 5      | 867.4683         | 434.237788       | 867.4605          | 434.2331         |
| 7      | 1033.5677        | 517.2875         |                   |                  | 6      | 982.4952         | 491.751238       | 982.4883          | 491.7457         |
| 8      | 1162.6103        | 581.8088         |                   |                  | 7      | 1095.5793        | 548.293288       | 1095.5786         | 548.2893         |
| 9      | 1325.6736        | 663.3404         |                   |                  | 8      | 1208.6634        | 604.835338       |                   | 604.8344         |
| 10     |                  |                  |                   |                  | 9      | 1371.7267        | 686.366988       |                   |                  |



# Tandem Mass Spectrum for $\gamma$ S: K\*PIDWGAASPAVQSFR (QE data)

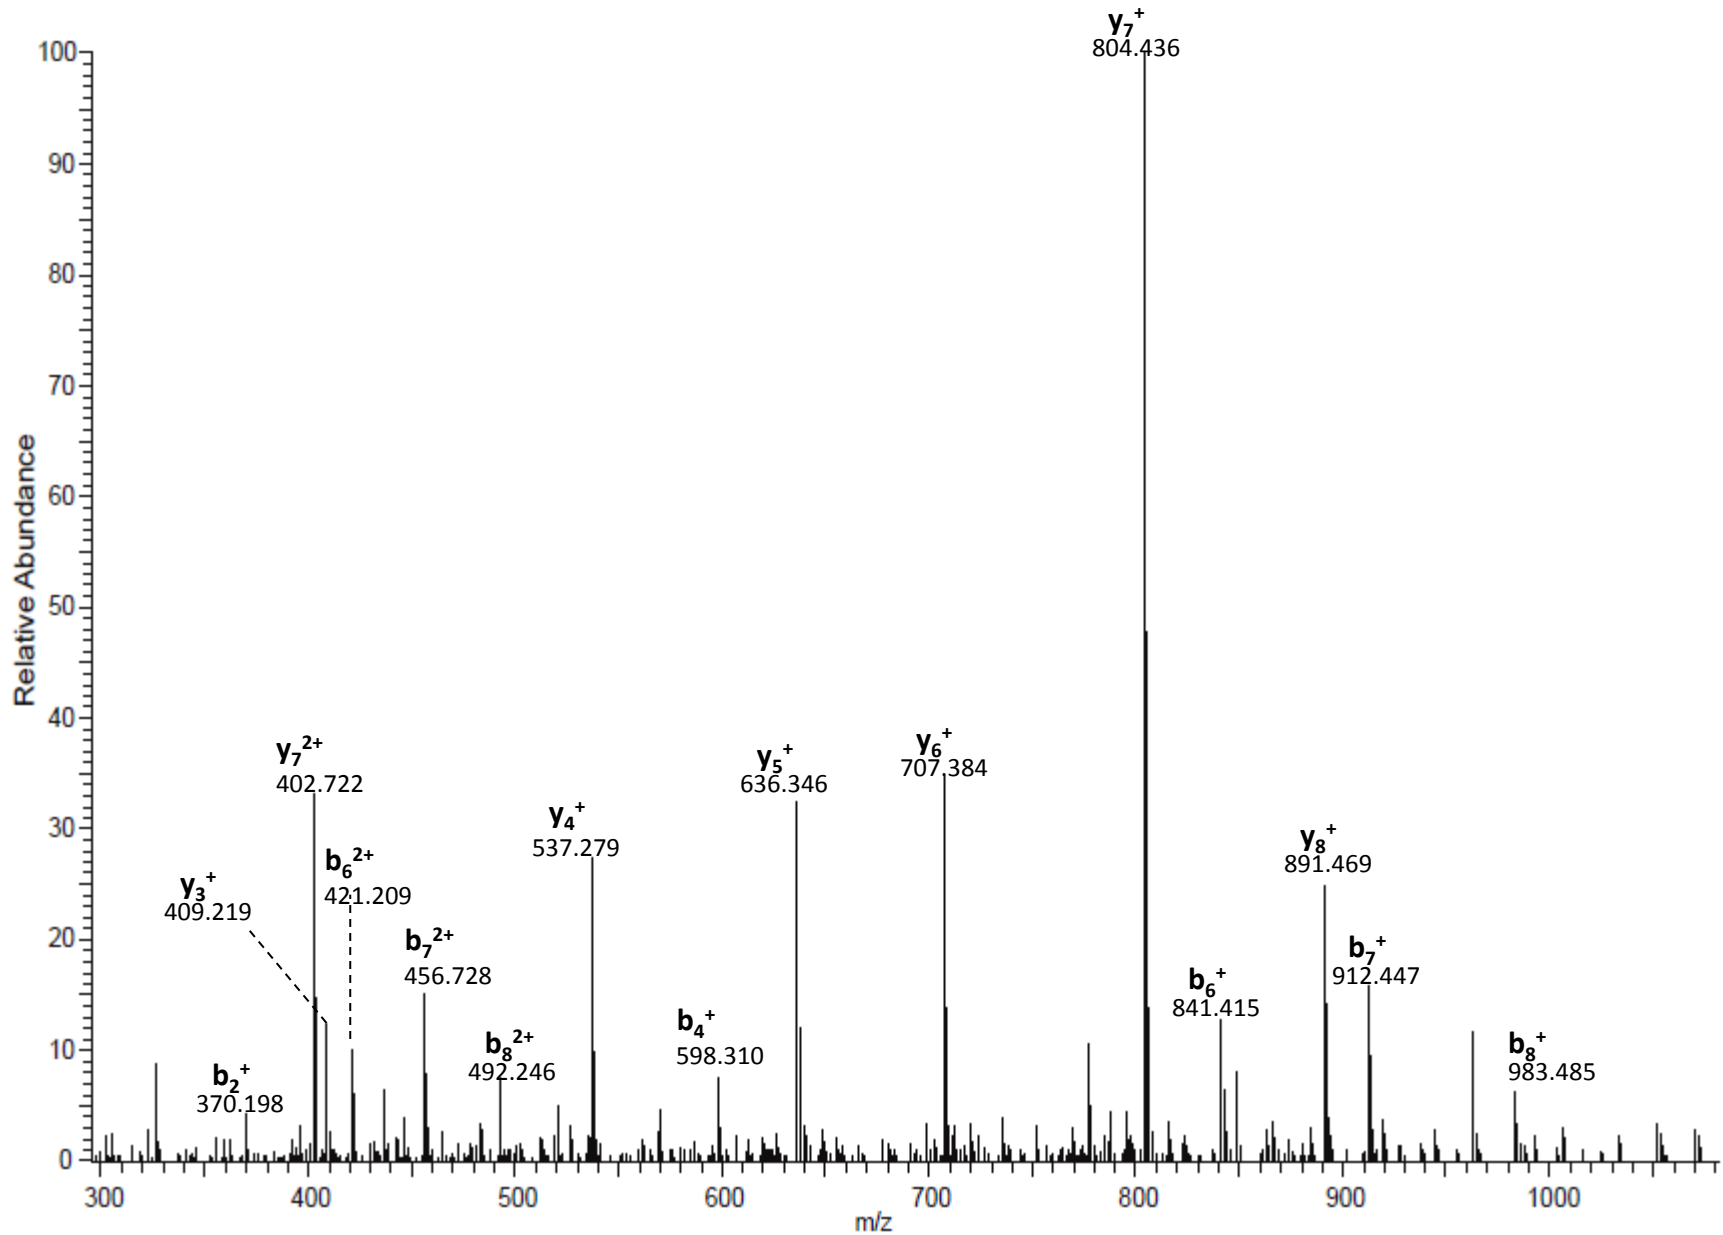

\* Indicates the site that is modified by CysGly

# Predicated and detected b- and $\gamma$ - ions for $\gamma$ S: K\*PIDWGAASPAVQSFR (QE data)

| b ions |                  |                  |                   |                  | y ions |                  |                  |                   |                  |
|--------|------------------|------------------|-------------------|------------------|--------|------------------|------------------|-------------------|------------------|
|        | Theoretical (+1) | Theoretical (+2) | Experimental (+1) | Experimental(+2) |        | Theoretical (+1) | Theoretical (+2) | Experimental (+1) | Experimental(+2) |
| 2      | 370.2085         | 185.6079         | 370.198           |                  | 1      | 175.119          | 88.063138        | 175.1195          |                  |
| 3      | 483.2926         | 242.1499         |                   |                  | 2      | 322.1874         | 161.597338       | 322.1832          |                  |
| 4      | 598.3195         | 299.6634         | 598.3101          |                  | 3      | 409.2194         | 205.113338       | 409.2194          |                  |
| 5      | 784.3988         | 392.7030         |                   |                  | 4      | 537.278          | 269.142638       | 537.2793          |                  |
| 6      | 841.4203         | 421.2138         | 841.4152          | 421.2087         | 5      | 636.3464         | 318.676838       | 636.3472          |                  |
| 7      | 912.4574         | 456.7323         | 912.4468          | 456.7275         | 6      | 707.3835         | 354.195388       | 707.3844          |                  |
| 8      | 983.4945         | 492.2509         | 983.4852          | 492.2456         | 7      | 804.4363         | 402.721788       | 804.4369          | 402.7221         |
| 9      | 1070.5265        | 535.7669         | 1070.5166         | 535.7625         | 8      | 891.4683         | 446.237788       | 891.4687          | 446.2373         |
| 10     | 1167.5793        | 584.2933         |                   |                  | 9      | 962.5054         | 481.756338       | 962.5075          |                  |
| 11     | 1238.6164        | 619.8118         |                   |                  | 10     | 1033.5425        | 517.274888       | 1033.5398         |                  |
| 12     | 1337.6848        | 669.3460         |                   | 669.347          | 11     | 1090.564         | 545.785638       | 1090.5655         |                  |
| 13     | 1465.7434        | 733.3753         |                   |                  | 12     | 1276.6433        | 638.825288       |                   |                  |
| 14     | 1552.7754        | 776.8913         |                   |                  | 13     | 1391.6702        | 696.338738       |                   | 696.34           |
| 15     | 1699.8439        | 850.4256         |                   |                  | 14     | 1504.7543        | 752.880788       |                   |                  |
|        |                  |                  |                   |                  | 15     | 1601.8071        | 801.407188       |                   |                  |

# Tandem Mass Spectrum for $\beta$ B1: VGSVK\*VSSGTWVGYPGYR (QE data)

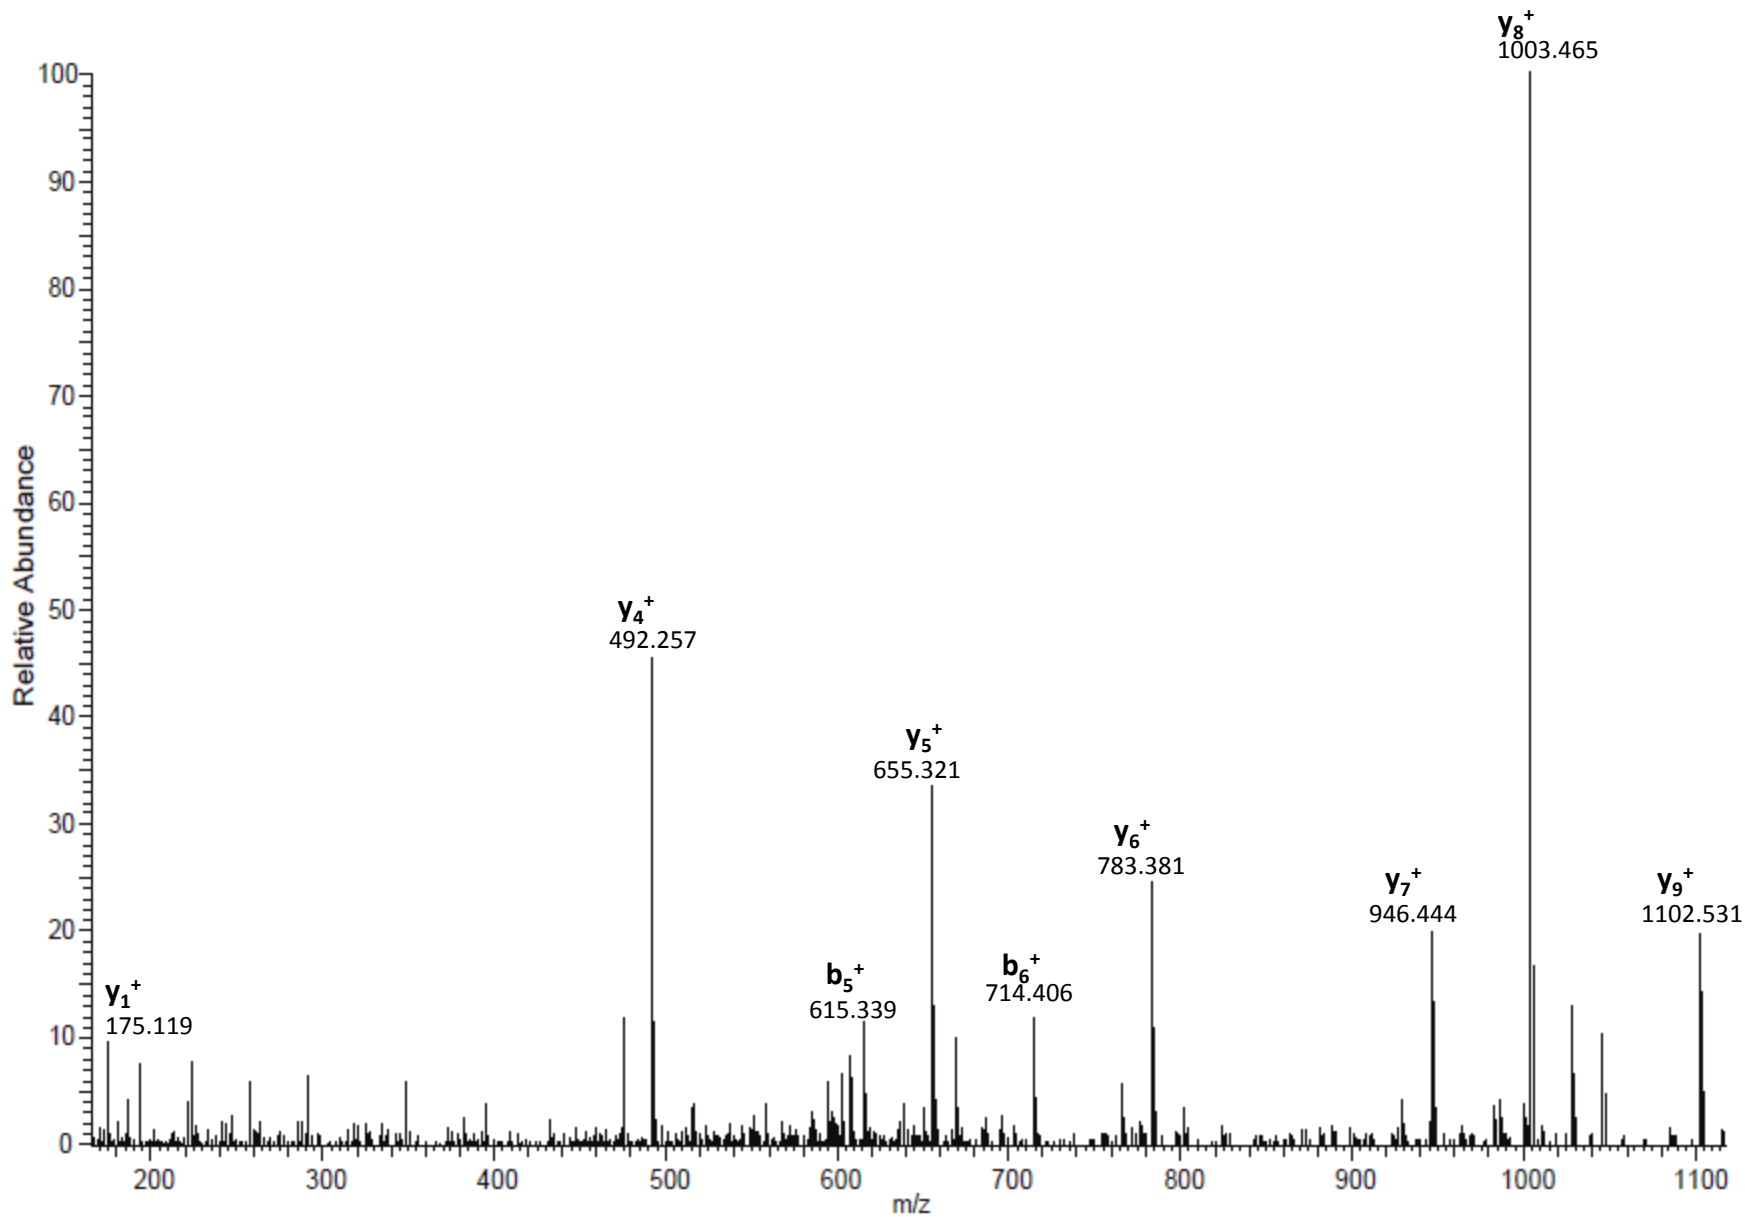

\* Indicates the site that is modified by CysGly

# Predicated and detected b- and y- ions for $\beta$ B1: VGSVK\*VSSGTWVG YQYPGYR (QE data)

| b ions |                  |                  |                   | y ions           |    |                  |                  |                   |                  |
|--------|------------------|------------------|-------------------|------------------|----|------------------|------------------|-------------------|------------------|
|        | Theoretical (+1) | Theoretical (+2) | Experimental (+1) | Experimental(+2) |    | Theoretical (+1) | Theoretical (+2) | Experimental (+1) | Experimental(+2) |
| 2      | 157.0972         | 79.0522          | 157.0974          |                  | 1  | 175.119          | 88.063138        | 175.1194          |                  |
| 3      | 244.1292         | 122.5682         | 244.1305          |                  | 2  | 338.1823         | 169.594788       |                   |                  |
| 4      | 343.1976         | 172.1024         |                   |                  | 3  | 395.2037         | 198.105488       |                   |                  |
| 5      | 615.3461         | 308.1767         | 615.3388          | 308.1721         | 4  | 492.2565         | 246.631888       | 492.2581          | 246.6323         |
| 6      | 714.4145         | 357.7109         | 714.4055          |                  | 5  | 655.3198         | 328.163538       | 655.3214          |                  |
| 7      | 801.4465         | 401.2269         | 801.4365          |                  | 6  | 783.3784         | 392.192838       | 783.3814          |                  |
| 8      | 888.4785         | 444.7429         | 888.4739          |                  | 7  | 946.4417         | 473.724488       | 946.4445          |                  |
| 9      | 945.5            | 473.2536         |                   |                  | 8  | 1003.4632        | 502.235238       | 1003.4654         |                  |
| 10     | 1046.5477        | 523.7775         | 1046.5403         | 523.77           | 9  | 1102.5316        | 551.769438       | 1102.5306         |                  |
| 11     | 1232.627         | 616.8171         | 1232.635          | 616.8126         | 10 | 1288.6109        | 644.809088       | 1288.613          |                  |
| 12     | 1331.6954        | 666.3513         |                   |                  | 11 | 1389.6586        | 695.332938       |                   |                  |
| 13     | 1388.7169        | 694.8621         |                   |                  | 12 | 1446.6801        | 723.843688       |                   |                  |
| 14     | 1551.7802        | 776.3937         |                   | 776.4099         | 13 | 1533.7121        | 767.359688       |                   |                  |
| 15     | 1679.8388        | 840.4230         |                   |                  | 14 | 1620.7441        | 810.875688       |                   |                  |
| 16     | 1842.9021        | 921.9547         |                   |                  | 15 | 1719.8125        | 860.409888       |                   |                  |
| 17     | 1939.9549        | 970.4811         |                   |                  | 16 | 1991.961         | 996.484138       |                   |                  |
| 18     | 1996.9763        | 998.9918         |                   |                  | 17 | 2091.0294        | 1046.018338      |                   |                  |
| 19     | 2160.0397        | 1080.5235        |                   |                  | 18 | 2178.0615        | 1089.534388      |                   |                  |
|        |                  |                  |                   |                  | 19 | 2235.0829        | 1118.045088      |                   |                  |

# Tandem Mass Spectrum for $\alpha$ B: HFSPEELK\*VK (QE data)

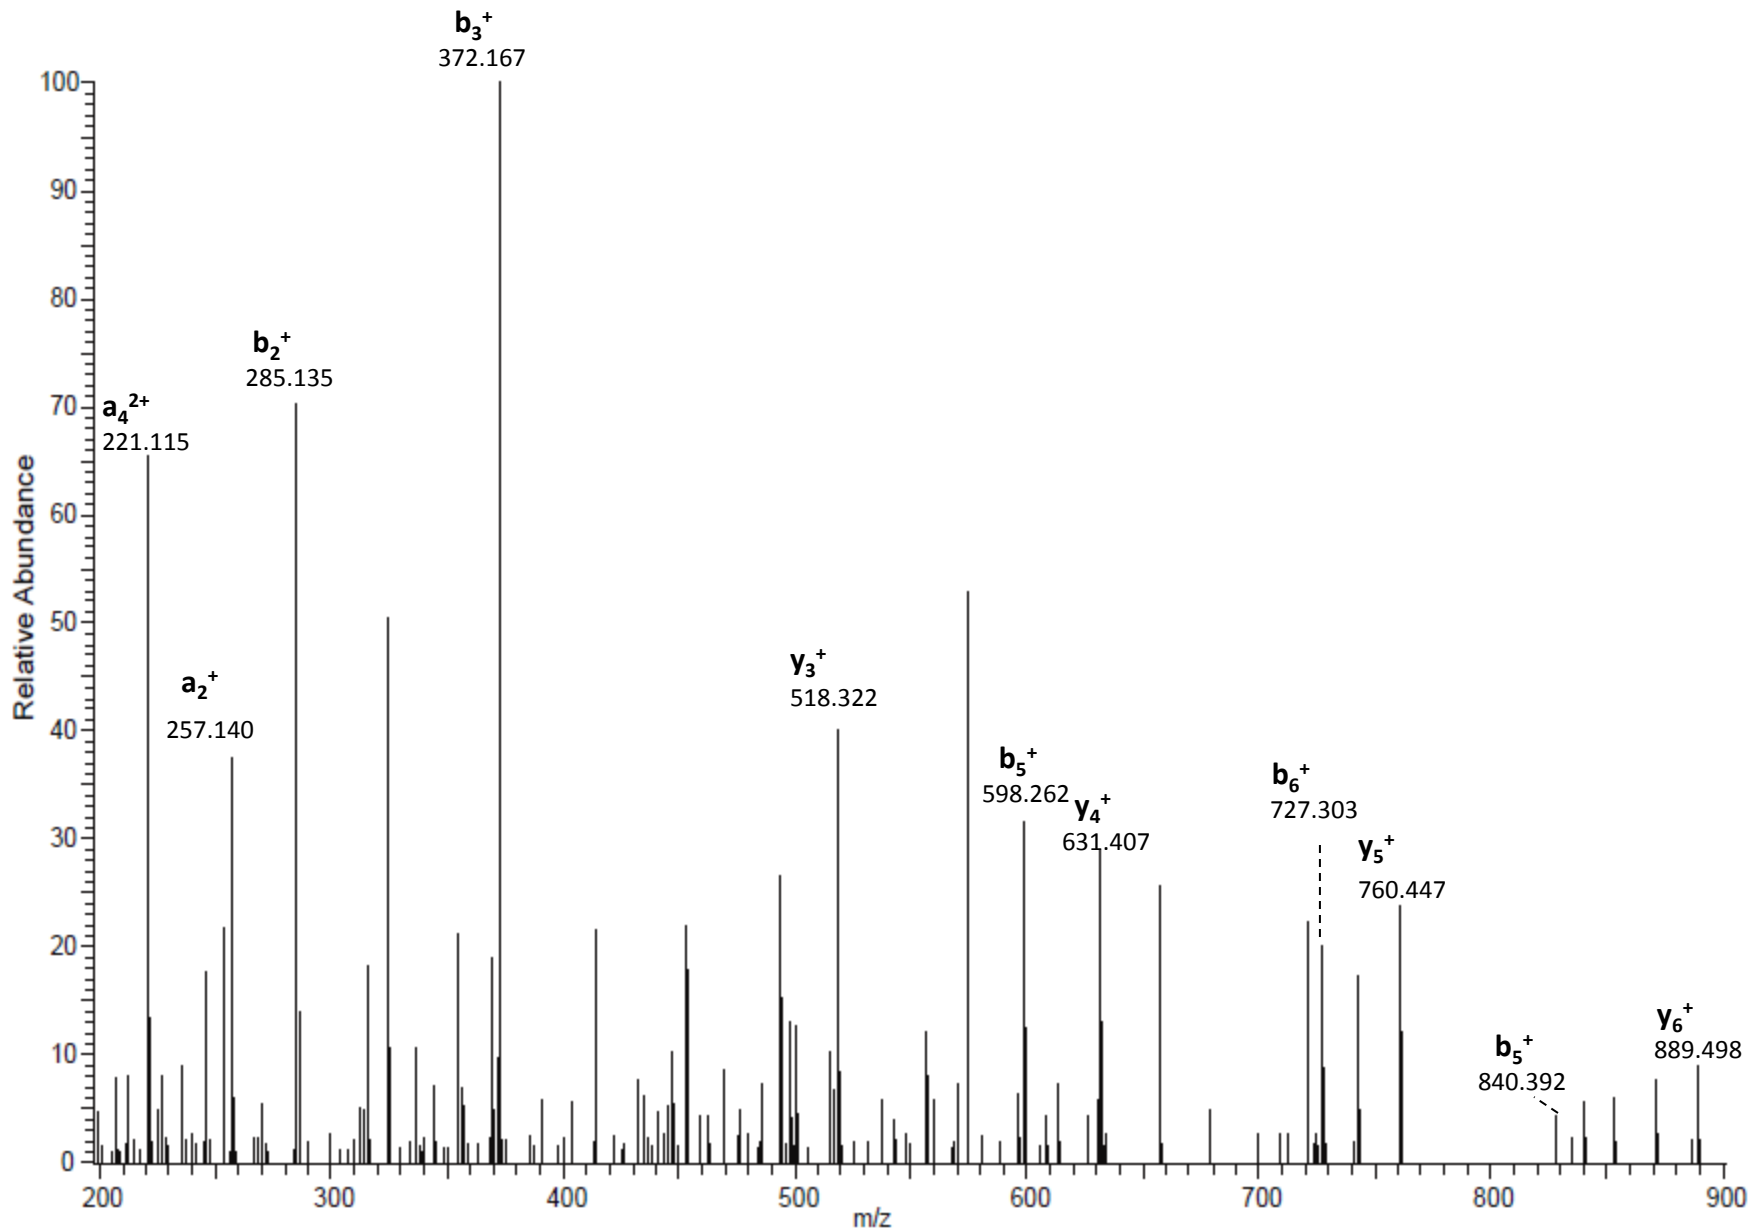

\* Indicates the site that is modified by CysGly

## Predicated and detected b- and y- ions for $\alpha$ B: HFSPEELK\*VK (QE data)

| b ions |                  |                  |                   |                  | y ions |                  |                  |                   |                  |
|--------|------------------|------------------|-------------------|------------------|--------|------------------|------------------|-------------------|------------------|
|        | Theoretical (+1) | Theoretical (+2) | Experimental (+1) | Experimental(+2) |        | Theoretical (+1) | Theoretical (+2) | Experimental (+1) | Experimental(+2) |
| 2      | 285.1346         | 143.0709         | 285.1353          |                  | 1      | 147.1128         | 74.060038        | 147.1133          |                  |
| 3      | 372.1666         | 186.5869         | 372.1675          |                  | 2      | 246.1812         | 123.594238       | 246.1815          |                  |
| 4      | 469.2194         | 235.1133         | 469.2256          | 235.1114         | 3      | 518.3297         | 259.668488       | 518.322           |                  |
| 5      | 598.262          | 299.6346         | 598.2619          | 299.6361         | 4      | 631.4137         | 316.210488       | 631.4065          | 316.2056         |
| 6      | 727.3046         | 364.1559         | 727.3033          | 364.1601         | 5      | 760.4563         | 380.731788       | 760.4467          | 380.7266         |
| 7      | 840.3886         | 420.6979         | 840.392           |                  | 6      | 889.4989         | 445.253088       | 889.4975          | 445.258          |
| 8      | 1112.5371        | 556.7722         |                   | 556.7664         | 7      | 986.5517         | 493.779488       | 986.544           | 493.775          |
| 9      | 1211.6055        | 606.3064         |                   | 606.3015         | 8      | 1073.5837        | 537.295488       |                   | 537.2955         |
| 10     |                  |                  |                   |                  | 9      | 1220.6521        | 610.829688       |                   |                  |

# Tandem Mass Spectrum for $\alpha$ B: VK\*VLGDVIEVHGK (QE data)

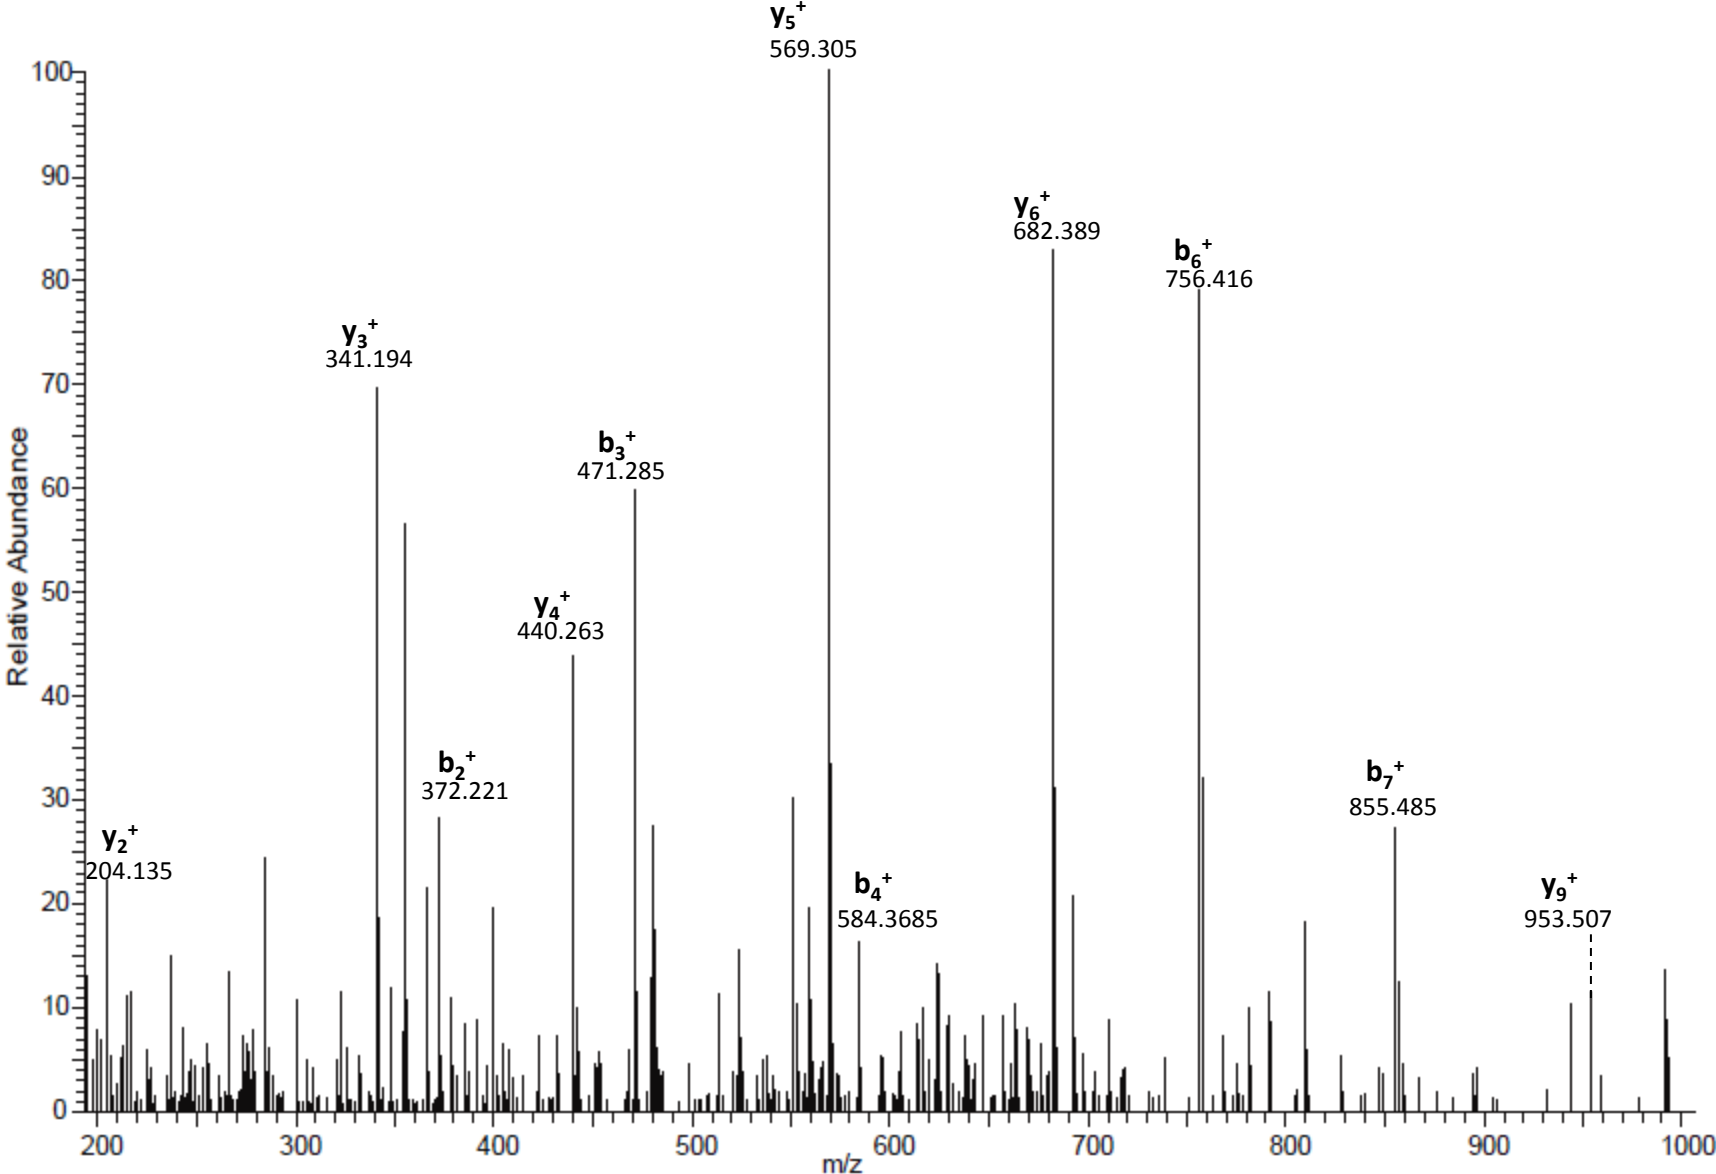

\* Indicates the site that is modified by CysGly

# Predicated and detected b- and y- ions for $\alpha$ B: VK\*VLGDVIEVHGK (QE data)

| b ions |                  |                  |                   | y ions           |    |                  |                  |                   |                  |
|--------|------------------|------------------|-------------------|------------------|----|------------------|------------------|-------------------|------------------|
|        | Theoretical (+1) | Theoretical (+2) | Experimental (+1) | Experimental(+2) |    | Theoretical (+1) | Theoretical (+2) | Experimental (+1) | Experimental(+2) |
| 2      | 372.2242         | 186.6157         | 372.221           |                  | 1  | 147.1128         | 74.060038        | 147.1133          |                  |
| 3      | 471.2926         | 236.1499         | 471.285           |                  | 2  | 204.1343         | 102.570788       | 204.1348          |                  |
| 4      | 584.3766         | 292.6919         | 584.3685          |                  | 3  | 341.1932         | 171.100238       | 341.1939          |                  |
| 5      | 641.3981         | 321.2027         | 641.3991          |                  | 4  | 440.2616         | 220.634438       | 440.2631          |                  |
| 6      | 756.425          | 378.7161         | 756.4155          | 378.7103         | 5  | 569.3042         | 285.155738       | 569.3054          |                  |
| 7      | 855.4935         | 428.2504         | 855.4849          |                  | 6  | 682.3883         | 341.697788       | 682.3894          |                  |
| 8      | 968.5775         | 484.7924         |                   |                  | 7  | 781.4567         | 391.231988       | 781.4567          |                  |
| 9      | 1097.6201        | 549.3137         |                   |                  | 8  | 896.4836         | 448.745438       | 896.4794          |                  |
| 10     | 1196.6885        | 598.8479         |                   |                  | 9  | 953.5051         | 477.256188       | 953.5071          |                  |
| 11     | 1333.7474        | 667.3773         |                   |                  | 10 | 1066.5891        | 533.798188       |                   |                  |
| 12     | 1390.7689        | 695.8881         |                   |                  | 11 | 1165.6575        | 583.332388       |                   |                  |
|        |                  |                  |                   |                  | 12 | 1437.806         | 719.406638       |                   |                  |



# Tandem Mass Spectrum for $\alpha$ B: EEKPAVTAAPK\*K (QE data)

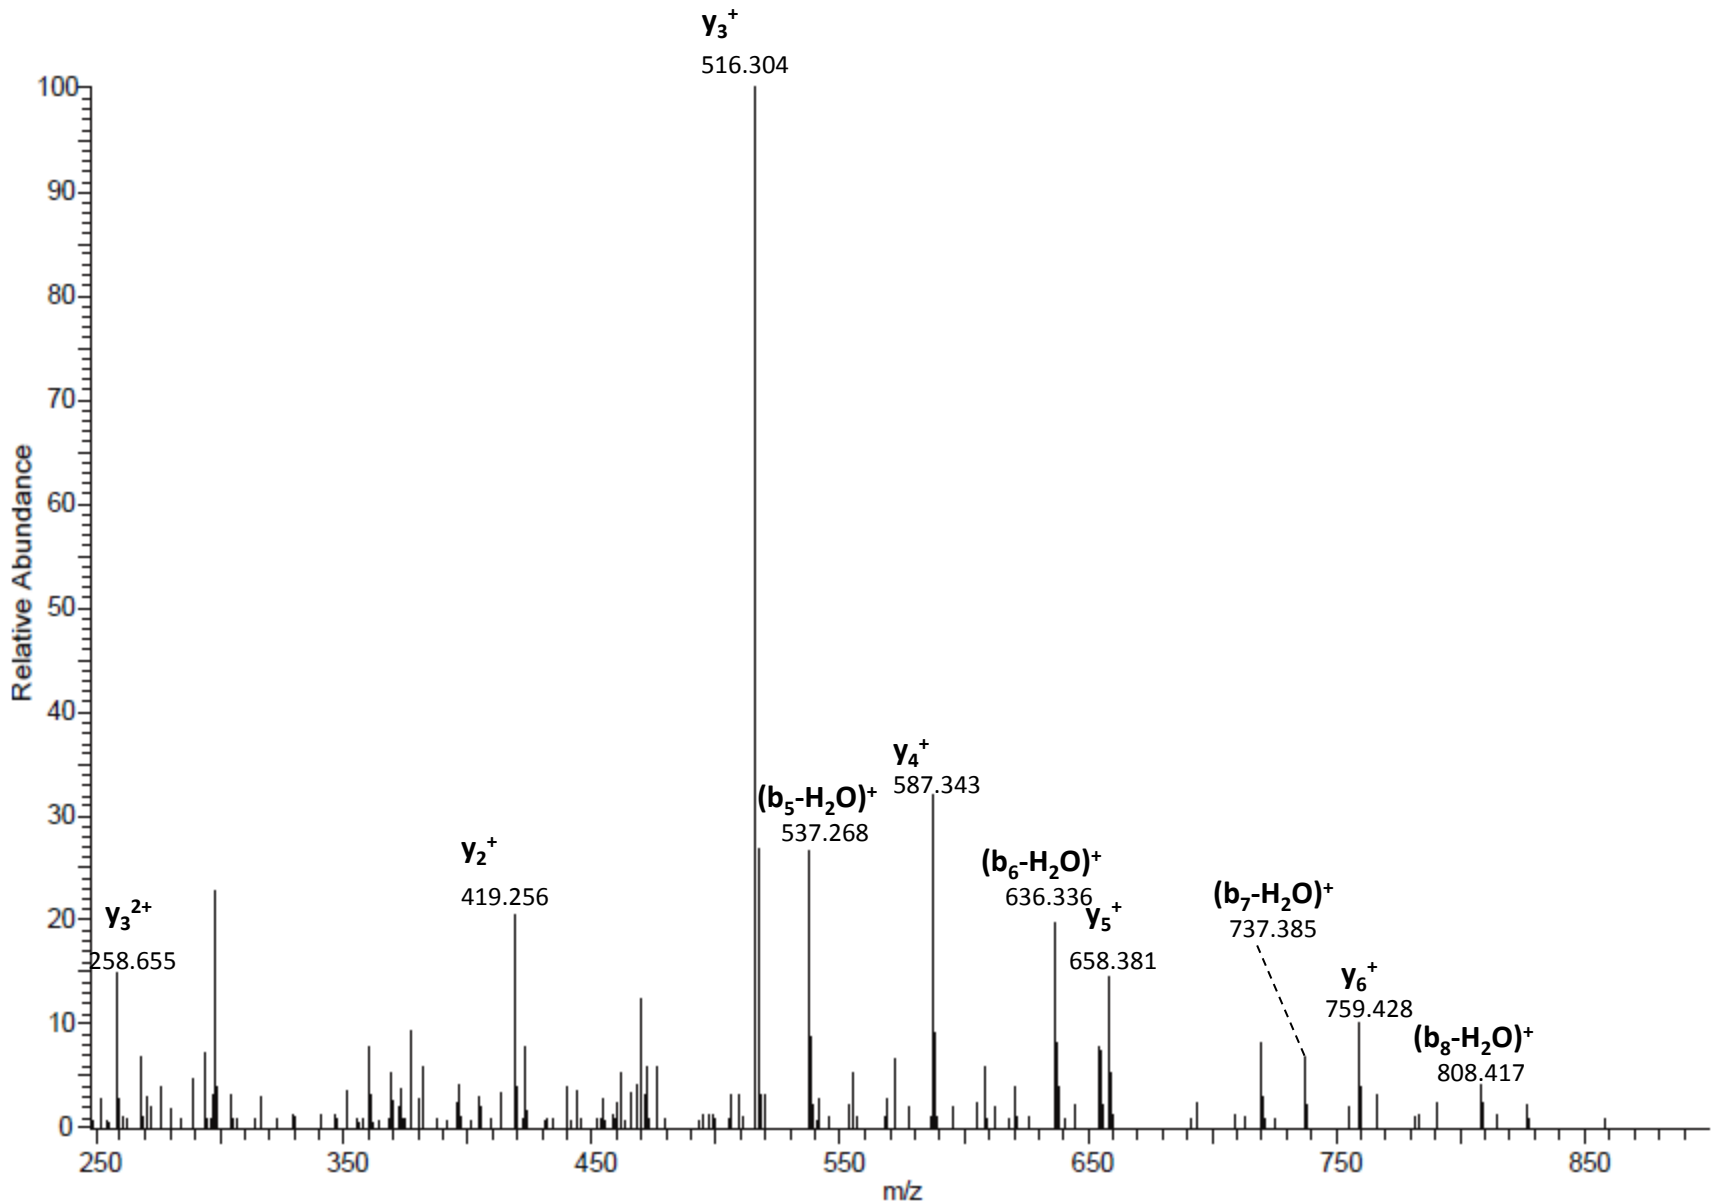

\* Indicates the site that is modified by CysGly

## Predicated and detected b- and y- ions for $\alpha$ B: EEKPAVTAAPK\*K (QE data)

| b ions |                  |                  |                   | y ions           |    |                  |                  |                   |                  |
|--------|------------------|------------------|-------------------|------------------|----|------------------|------------------|-------------------|------------------|
|        | Theoretical (+1) | Theoretical (+2) | Experimental (+1) | Experimental(+2) |    | Theoretical (+1) | Theoretical (+2) | Experimental (+1) | Experimental(+2) |
| 2      | 259.0925         | 130.0499         |                   |                  | 1  | 147.1128         | 74.060038        | 147.1132          |                  |
| 3      | 387.1874         | 194.0973         |                   |                  | 2  | 419.2613         | 210.134288       | 419.2557          |                  |
| 4      | 484.2402         | 242.6237         |                   |                  | 3  | 516.314          | 258.660638       | 516.304           | 258.6553         |
| 5      | 555.2773         | 278.1423         | 555.2789          |                  | 4  | 587.3511         | 294.179188       | 587.3433          | 294.1748         |
| 6      | 654.3457         | 327.6765         | 654.3439          |                  | 5  | 658.3883         | 329.697788       | 658.3811          | 329.693          |
| 7      | 755.3934         | 378.2003         | 755.4014          |                  | 6  | 759.4359         | 380.221588       | 759.4275          | 380.2175         |
| 8      | 826.4305         | 413.7189         | 826.4253          |                  | 7  | 858.5044         | 429.755838       | 858.4985          |                  |
| 9      | 897.4676         | 449.2374         |                   |                  | 8  | 929.5415         | 465.274388       |                   |                  |
| 10     | 994.5204         | 497.7638         |                   |                  | 9  | 1026.5942        | 513.800738       |                   |                  |
| 11     | 1266.6689        | 633.8381         |                   |                  | 10 | 1154.6892        | 577.848238       |                   | 577.8478         |
|        |                  |                  |                   |                  | 11 | 1283.7318        | 642.369538       |                   |                  |

# Tandem Mass Spectrum for $\alpha$ A: SDRDK\*FVIFLDVK (QE data)

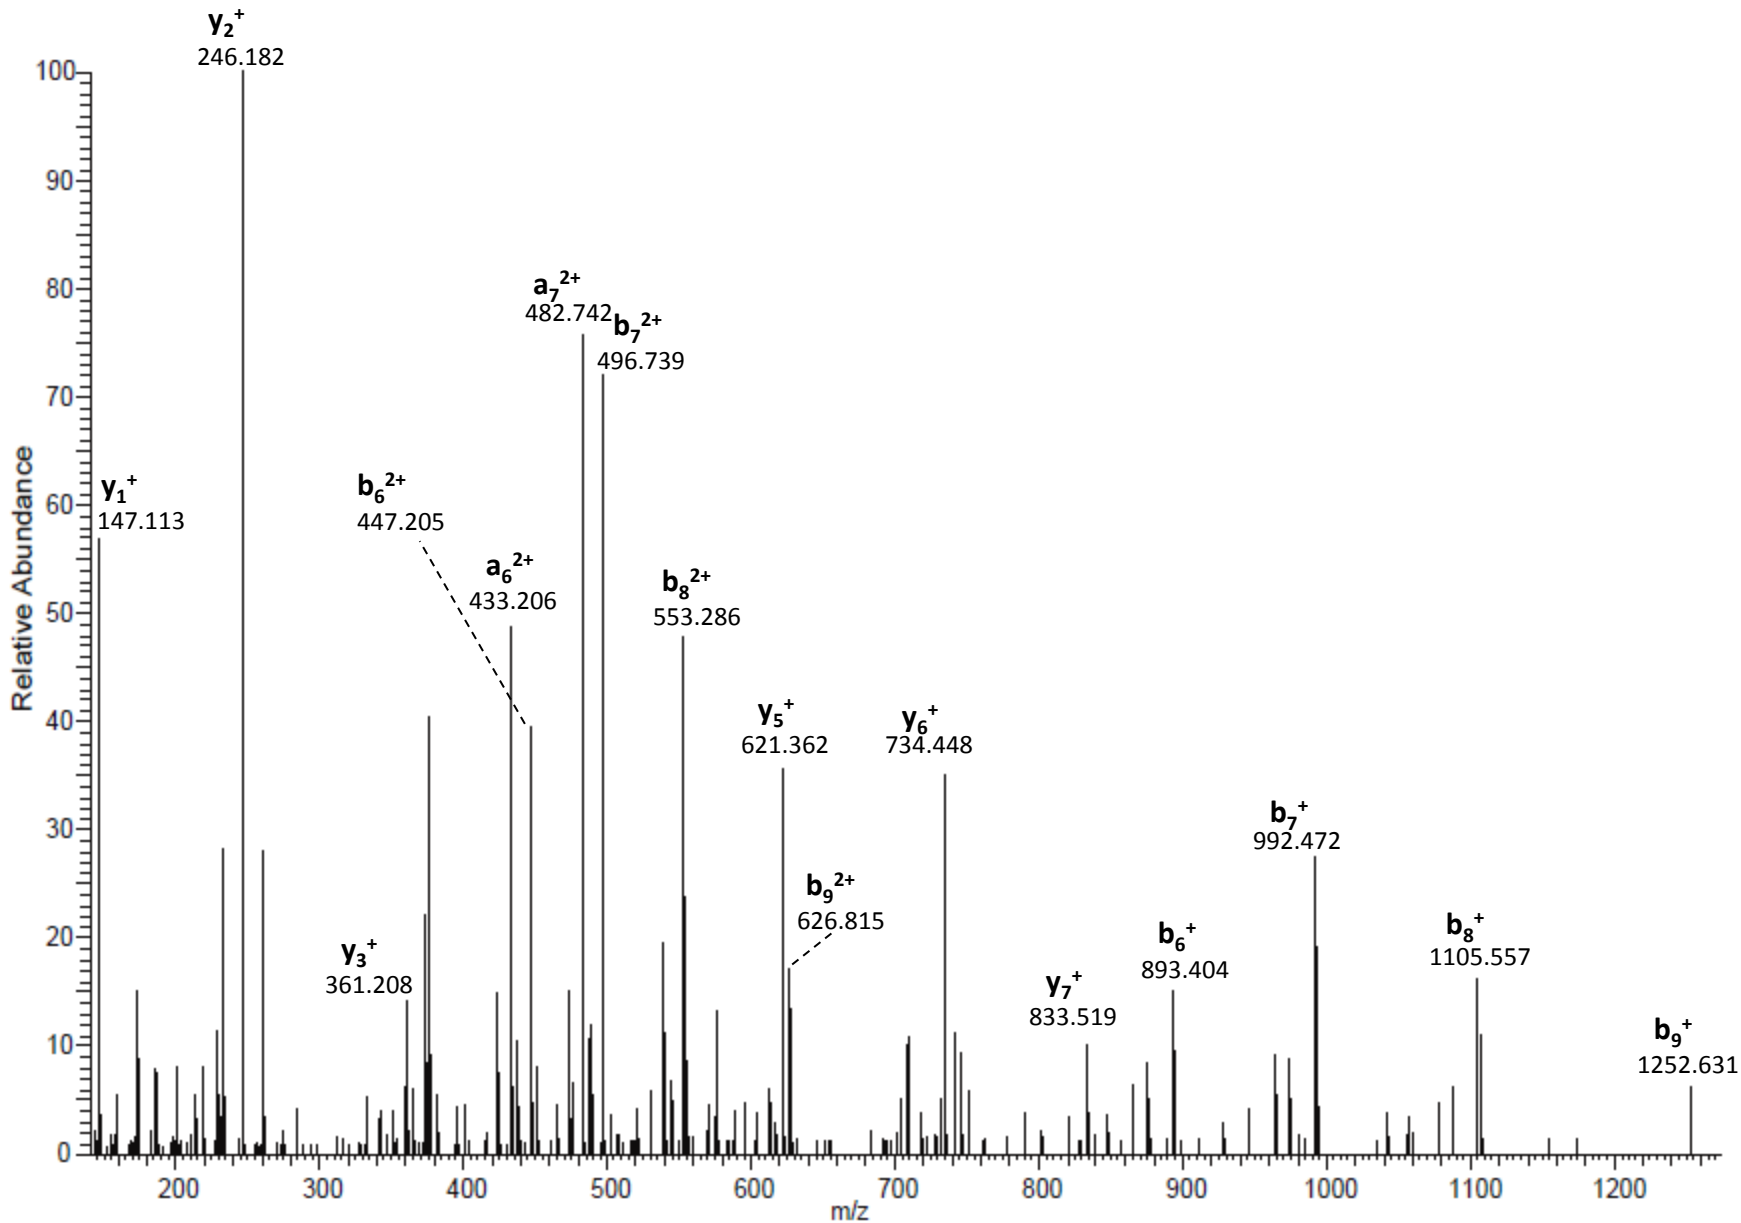

\* Indicates the site that is modified by CysGly

## Predicated and detected b- and y- ions for $\alpha$ A: SDRDK\*FVIFLDVK (QE data)

| b ions |                  |                  |                   |                  | y ions |                  |                  |                   |                  |
|--------|------------------|------------------|-------------------|------------------|--------|------------------|------------------|-------------------|------------------|
|        | Theoretical (+1) | Theoretical (+2) | Experimental (+1) | Experimental(+2) |        | Theoretical (+1) | Theoretical (+2) | Experimental (+1) | Experimental(+2) |
| 2      | 203.0662         | 102.0367         |                   |                  | 1      | 147.1128         | 74.060038        | 147.1133          |                  |
| 3      | 359.1674         | 180.0873         | 359.1682          |                  | 2      | 246.1812         | 123.594238       | 246.1818          |                  |
| 4      | 474.1943         | 237.6008         | 474.194           |                  | 3      | 361.2082         | 181.107738       | 361.2087          |                  |
| 5      | 746.3428         | 373.6750         | 746.3381          | 373.67           | 4      | 474.2922         | 237.649738       | 474.2931          |                  |
| 6      | 893.4112         | 447.2092         | 893.4036          | 447.2049         | 5      | 621.3606         | 311.183938       | 621.3624          |                  |
| 7      | 992.4796         | 496.7434         | 992.472           | 496.7393         | 6      | 734.4447         | 367.725988       | 734.4483          |                  |
| 8      | 1105.5637        | 553.2855         | 1105.557          | 553.2822         | 7      | 833.5131         | 417.260188       | 833.5189          |                  |
| 9      | 1252.6321        | 626.8197         | 1252.6306         | 626.8151         | 8      | 980.5815         | 490.794388       |                   |                  |
| 10     | 1365.7161        | 683.3617         |                   | 683.3623         | 9      | 1252.73          | 626.868638       | 1252.6306         |                  |
| 11     | 1480.7431        | 740.8752         |                   | 740.872          | 10     | 1367.7569        | 684.382088       |                   |                  |
| 12     | 1579.8115        | 790.4094         |                   | 790.4042         | 11     | 1523.858         | 762.432638       |                   |                  |
|        |                  |                  |                   |                  | 12     | 1638.885         | 819.946138       |                   |                  |

# Tandem Mass Spectrum for $\alpha$ A: FVIFLDVK\*HFSPEDLTVK (QE data)

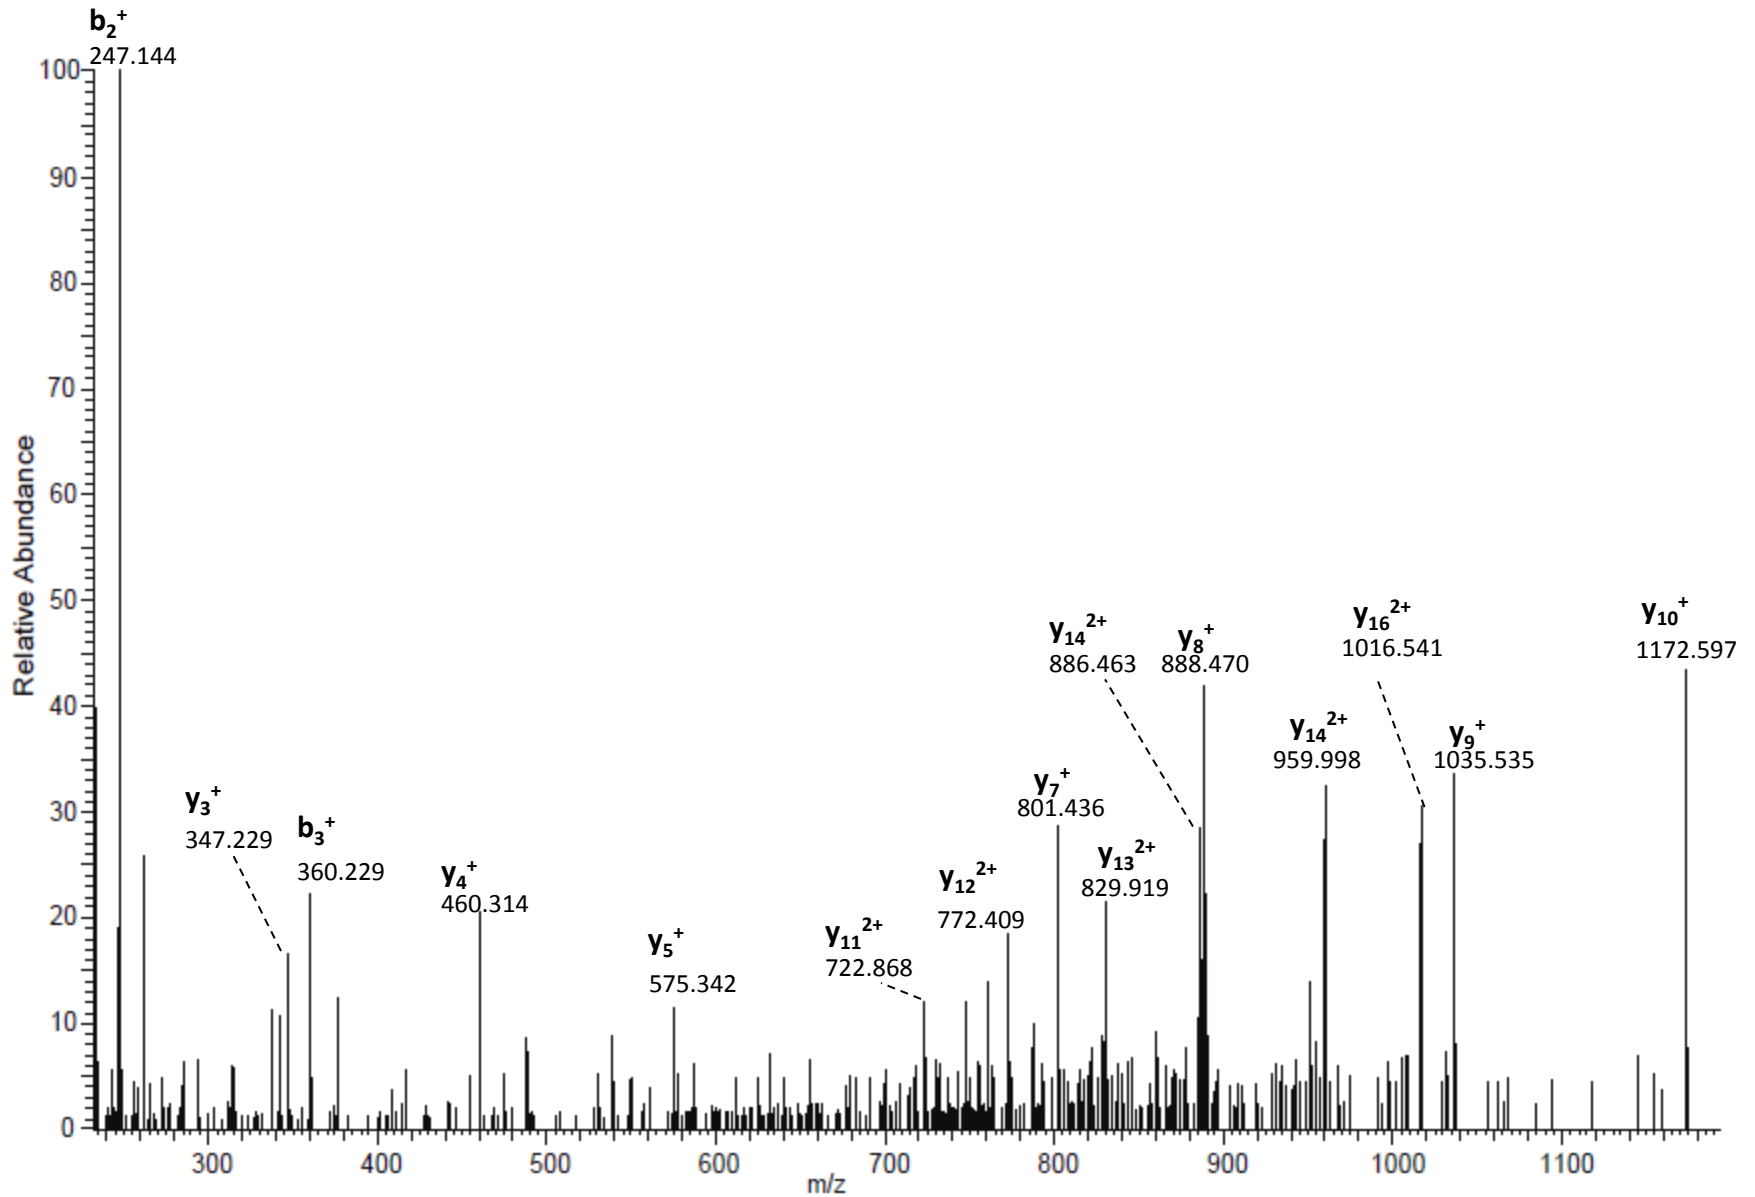

\* Indicates the site that is modified by CysGly

# Predicated and detected b- and y- ions for $\alpha$ A: FVIFLDVK\*HFSPEDLTVK (QE data)

| b ions |                  |                  |                   | y ions           |    |                  |                  |                   |                  |
|--------|------------------|------------------|-------------------|------------------|----|------------------|------------------|-------------------|------------------|
|        | Theoretical (+1) | Theoretical (+2) | Experimental (+1) | Experimental(+2) |    | Theoretical (+1) | Theoretical (+2) | Experimental (+1) | Experimental(+2) |
| 2      | 247.1441         | 124.0757         |                   |                  | 1  | 147.1128         | 74.060038        | 147.1133          |                  |
| 3      | 360.2282         | 180.6177         | 360.2296          |                  | 2  | 246.1812         | 123.594238       |                   |                  |
| 4      | 507.2966         | 254.1519         | 507.2971          |                  | 3  | 347.2289         | 174.118088       | 347.2291          |                  |
| 5      | 620.3806         | 310.6939         |                   |                  | 4  | 460.313          | 230.660138       | 460.3143          |                  |
| 6      | 735.4076         | 368.2074         |                   |                  | 5  | 575.3399         | 288.173588       | 575.3423          |                  |
| 7      | 834.476          | 417.7416         |                   |                  | 6  | 704.3825         | 352.694888       |                   |                  |
| 8      | 1106.6245        | 553.8159         |                   |                  | 7  | 801.4353         | 401.221288       | 801.4364          | 401.2228         |
| 9      | 1243.6834        | 622.3453         |                   |                  | 8  | 888.4673         | 444.737288       | 888.4704          |                  |
| 10     | 1390.7518        | 695.8795         |                   |                  | 9  | 1035.5357        | 518.271488       | 1035.5351         |                  |
| 11     | 1477.7838        | 739.3955         |                   |                  | 10 | 1172.5946        | 586.800938       | 1172.597          | 586.8029         |
| 12     | 1574.8366        | 787.9219         |                   |                  | 11 | 1444.7431        | 722.875188       |                   | 722.868          |
| 13     | 1703.8792        | 852.4432         |                   |                  | 12 | 1543.8115        | 772.409388       |                   | 772.4094         |
| 14     | 1818.9061        | 909.9567         |                   |                  | 13 | 1658.8384        | 829.922838       |                   | 829.9188         |
| 15     | 1931.9902        | 966.4987         |                   |                  | 14 | 1771.9225        | 886.464888       |                   | 886.4633         |
| 16     | 2033.0379        | 1017.0226        |                   |                  | 15 | 1918.9909        | 959.999088       |                   | 959.9975         |
| 17     | 2132.1063        | 1066.5568        |                   |                  | 16 | 2032.075         | 1016.541138      |                   | 1016.5414        |
|        |                  |                  |                   |                  | 17 | 2131.1434        | 1066.075338      |                   |                  |

# Tandem Mass Spectrum for $\alpha$ A: HFSPEDLTVK\*VQDDFVEIHGK (QE data)

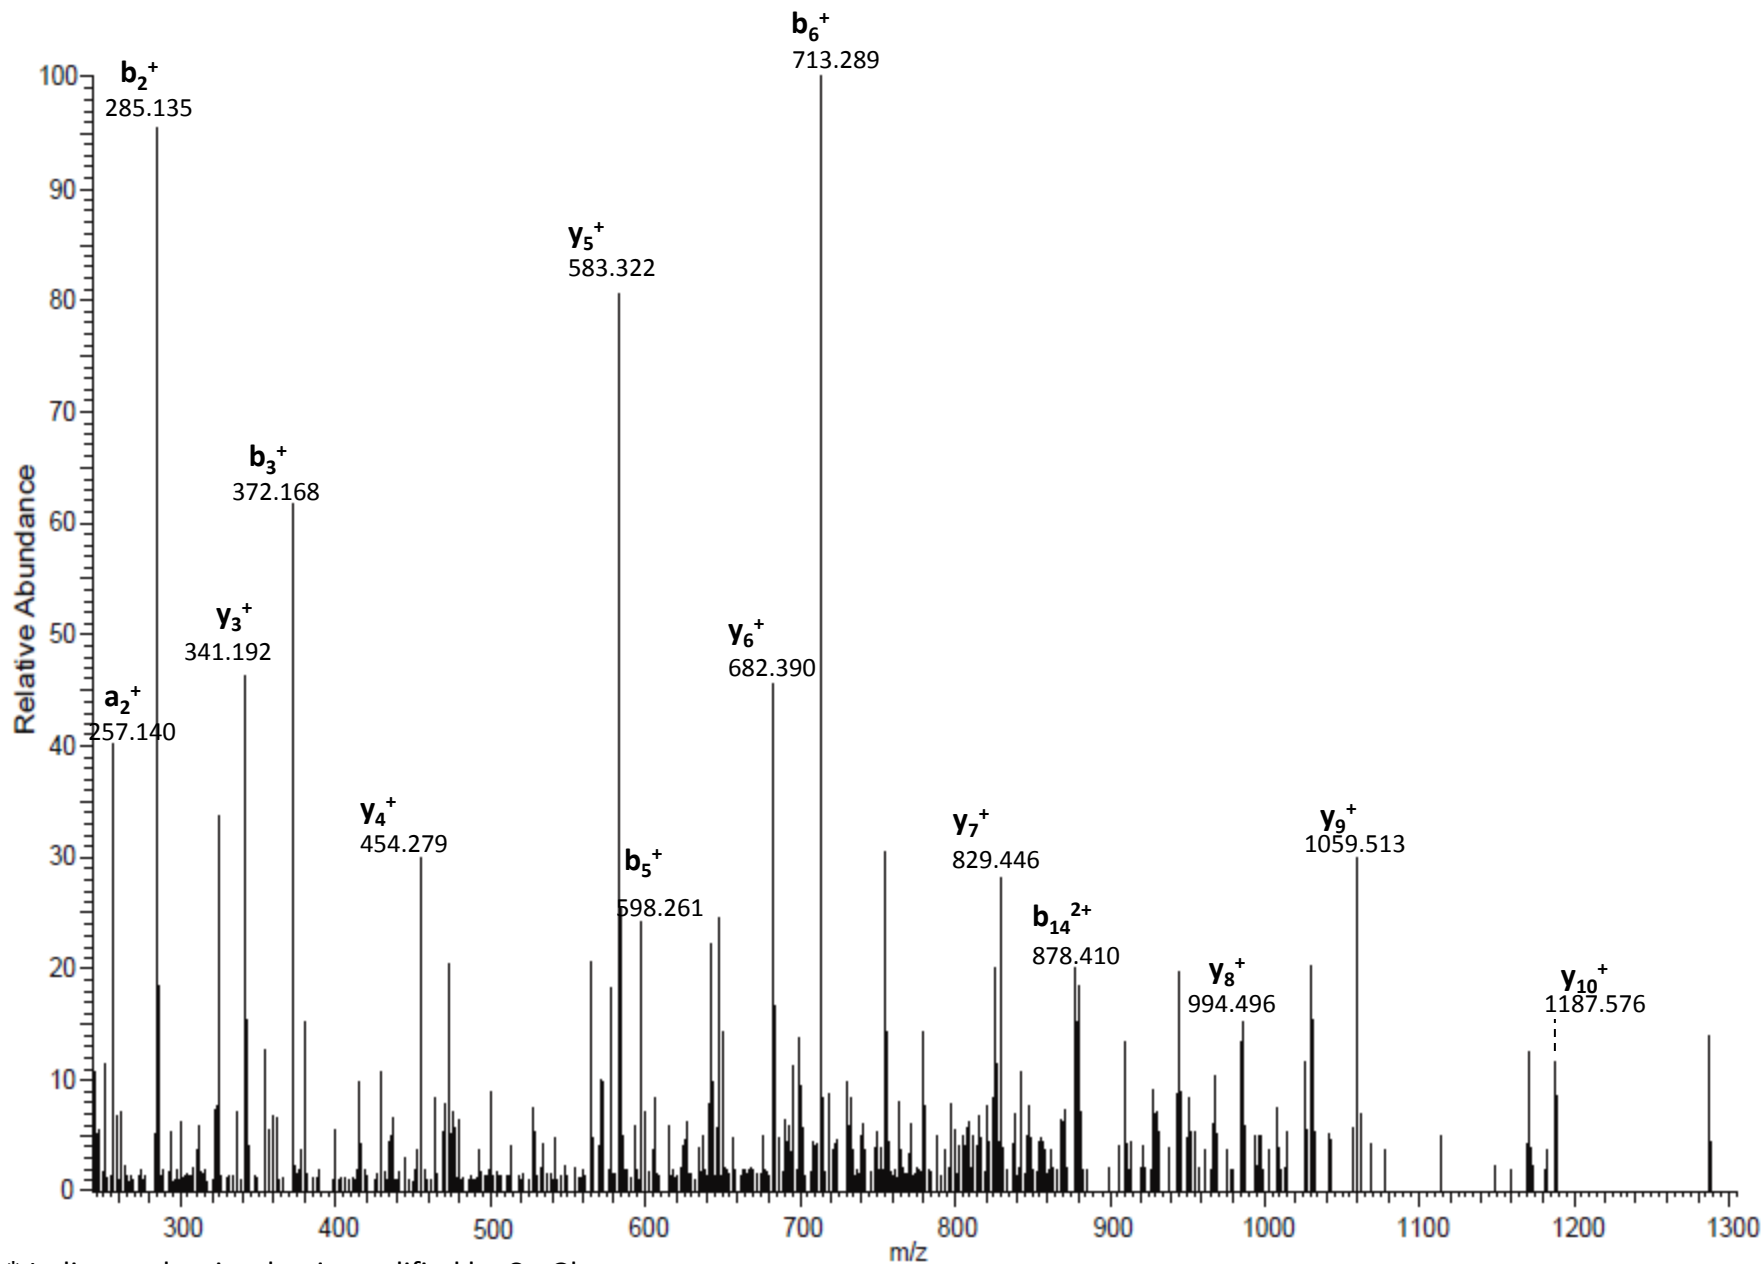

\* Indicates the site that is modified by CysGly

# Predicated and detected b- and y- ions for $\alpha$ A: HFSPEDLTVK\*VQDDFVEIHGK (QE data)

| b ions |                  |                  |                   | y ions           |    |                  |                  |                   |                  |
|--------|------------------|------------------|-------------------|------------------|----|------------------|------------------|-------------------|------------------|
|        | Theoretical (+1) | Theoretical (+2) | Experimental (+1) | Experimental(+2) |    | Theoretical (+1) | Theoretical (+2) | Experimental (+1) | Experimental(+2) |
| 2      | 285.1346         | 143.0709         | 285.1354          |                  | 1  | 147.1128         | 74.060038        | 147.1134          |                  |
| 3      | 372.1666         | 186.5869         | 372.1682          |                  | 2  | 204.1343         | 102.570788       | 204.135           |                  |
| 4      | 469.2194         | 235.1133         |                   |                  | 3  | 341.1932         | 171.100238       | 341.1924          |                  |
| 5      | 598.262          | 299.6346         | 598.2613          | 299.636          | 4  | 454.2772         | 227.642238       | 454.2794          |                  |
| 6      | 713.2889         | 357.1481         | 713.2895          | 357.1491         | 5  | 583.3198         | 292.163538       | 583.3217          |                  |
| 7      | 826.373          | 413.6901         | 826.3729          | 413.6919         | 6  | 682.3883         | 341.697788       | 682.3899          |                  |
| 8      | 927.4207         | 464.2140         | 927.429           | 464.2111         | 7  | 829.4567         | 415.231988       | 829.4461          | 415.2353         |
| 9      | 1026.4891        | 513.7482         | 1026.4999         |                  | 8  | 944.4836         | 472.745438       | 944.4966          |                  |
| 10     | 1298.6375        | 649.8224         |                   | 649.8165         | 9  | 1059.5106        | 530.258938       | 1059.5133         | 530.254          |
| 11     | 1397.706         | 699.3566         |                   | 699.3572         | 10 | 1187.5691        | 594.288188       | 1187.5757         |                  |
| 12     | 1525.7645        | 763.3859         |                   | 763.3801         | 11 | 1286.6375        | 643.822388       |                   |                  |
| 13     | 1640.7915        | 820.8994         |                   |                  | 12 | 1558.786         | 779.896638       |                   | 779.8908         |
| 14     | 1755.8184        | 878.4128         |                   | 878.4095         | 13 | 1657.8544        | 829.430838       |                   | 829.4451         |
| 15     | 1902.8868        | 951.9470         |                   | 951.9451         | 14 | 1758.9021        | 879.954688       |                   | 879.9469         |
| 16     | 2001.9553        | 1001.4813        |                   |                  | 15 | 1871.9862        | 936.496738       |                   |                  |
| 17     | 2130.9978        | 1066.0025        |                   |                  | 16 | 1987.0131        | 994.010188       |                   |                  |
| 18     | 2244.0819        | 1122.5446        |                   |                  | 17 | 2116.0557        | 1058.531488      |                   |                  |
| 19     | 2381.1408        | 1191.0740        |                   |                  | 18 | 2213.1085        | 1107.057888      |                   |                  |
| 20     | 2438.1623        | 1219.5848        |                   |                  | 19 | 2300.1405        | 1150.573888      |                   |                  |
|        |                  |                  |                   |                  | 20 | 2447.2089        | 1224.108088      |                   |                  |



# Tandem Mass Spectrum for $\alpha$ A: VQDDFVEIHGK\*HNER (QE data)

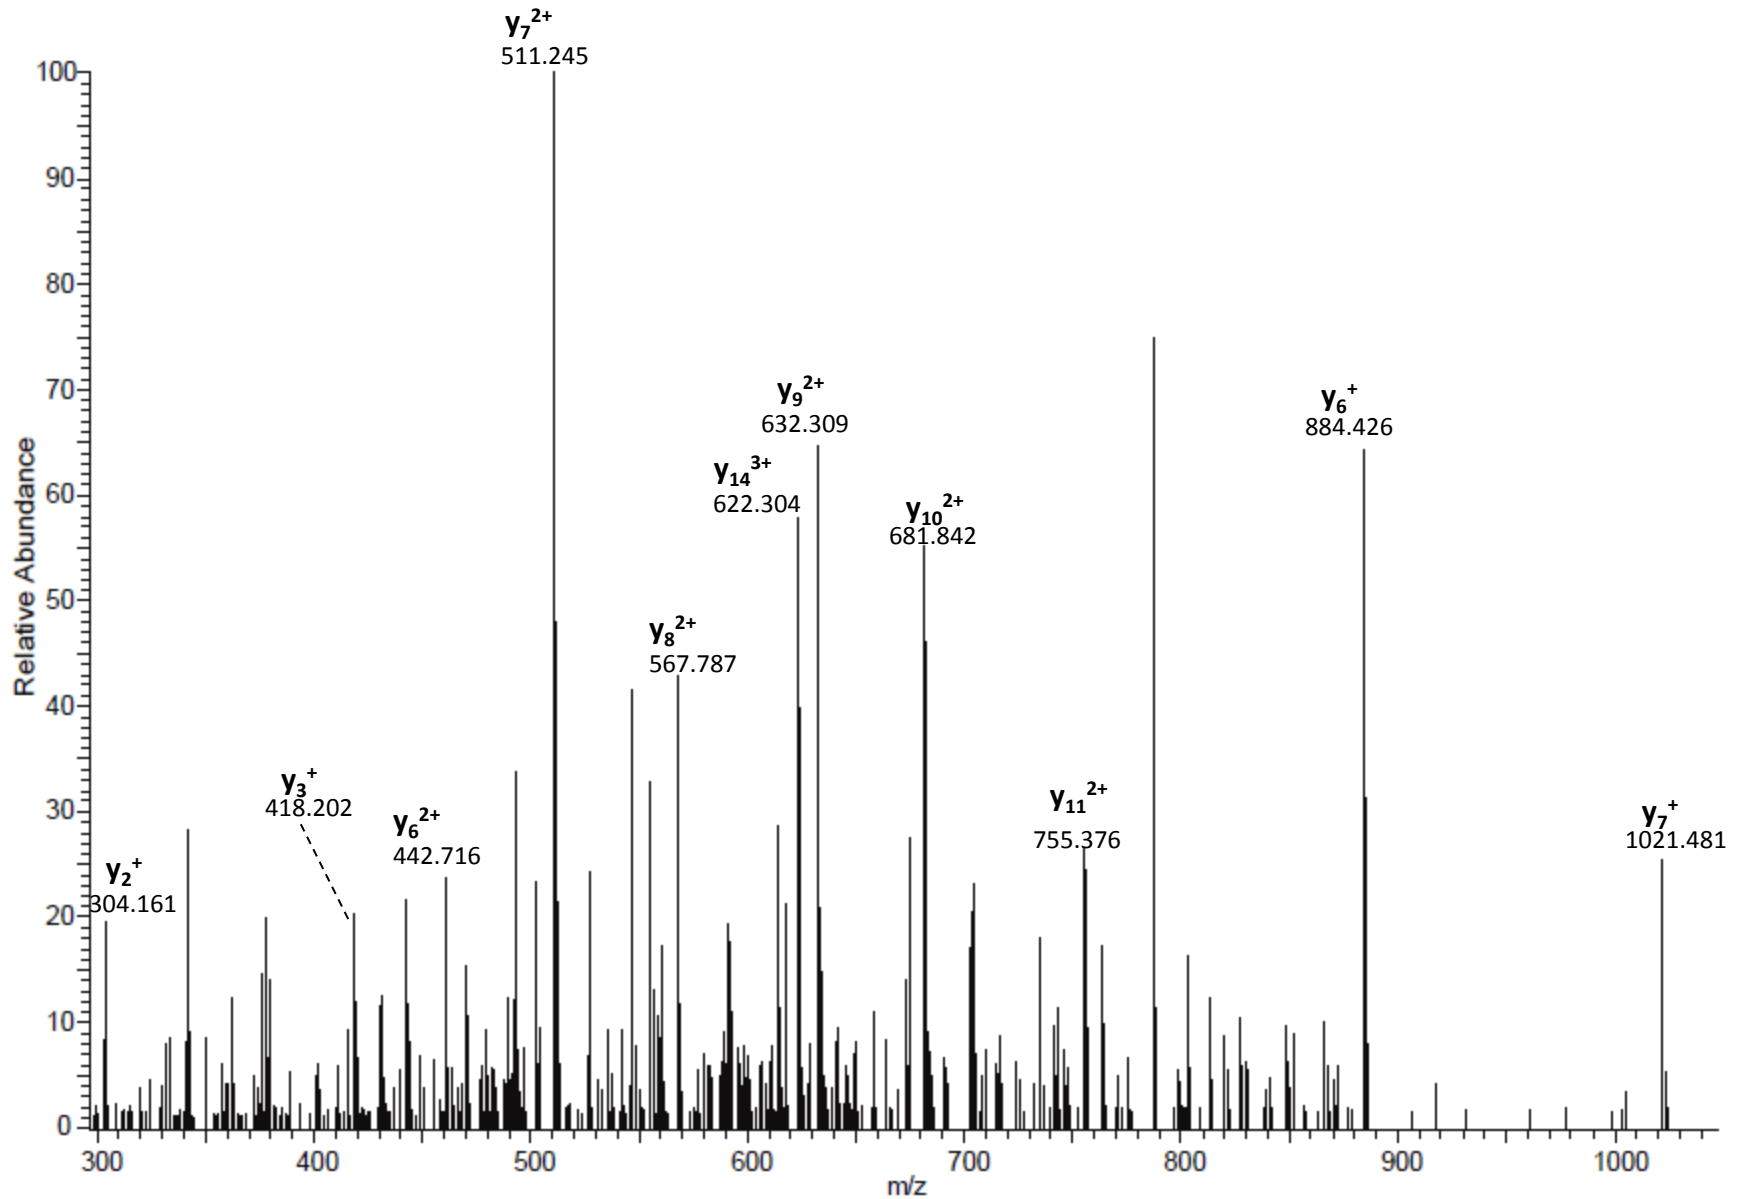

\* Indicates the site that is modified by CysGly

# Predicated and detected b- and y- ions for $\alpha$ A: VQDDFVEIHGK\*HNER (QE data)

| b ions |                  |                  |                   | y ions           |    |                  |                  |                   |                  |
|--------|------------------|------------------|-------------------|------------------|----|------------------|------------------|-------------------|------------------|
|        | Theoretical (+1) | Theoretical (+2) | Experimental (+1) | Experimental(+2) |    | Theoretical (+1) | Theoretical (+2) | Experimental (+1) | Experimental(+2) |
| 2      | 228.1343         | 114.5708         | 228.1347          |                  | 1  | 175.119          | 88.063138        | 175.1192          |                  |
| 3      | 343.1612         | 172.0842         | 343.1657          |                  | 2  | 304.1615         | 152.584388       | 304.1611          |                  |
| 4      | 458.1882         | 229.5977         | 458.1812          |                  | 3  | 418.2045         | 209.605888       | 418.2018          |                  |
| 5      | 605.2566         | 303.1319         |                   |                  | 4  | 555.2634         | 278.135338       | 555.2623          |                  |
| 6      | 704.325          | 352.6661         |                   |                  | 5  | 827.4118         | 414.209538       | 827.4014          |                  |
| 7      | 833.3676         | 417.1874         |                   |                  | 6  | 884.4333         | 442.720288       | 884.4255          | 442.7157         |
| 8      | 946.4516         | 473.7294         |                   |                  | 7  | 1021.4922        | 511.249738       | 1021.481          | 511.2445         |
| 9      | 1083.5106        | 542.2589         |                   |                  | 8  | 1134.5763        | 567.791788       | 1134.5675         | 567.7867         |
| 10     | 1140.532         | 570.7696         |                   |                  | 9  | 1263.6189        | 632.313088       | 1263.6154         | 632.3091         |
| 11     | 1412.6805        | 706.8439         |                   |                  | 10 | 1362.6873        | 681.847288       |                   | 681.8416         |
| 12     | 1549.7394        | 775.3733         |                   |                  | 11 | 1509.7557        | 755.381488       |                   | 755.3756         |
| 13     | 1663.7823        | 832.3948         |                   |                  | 12 | 1624.7827        | 812.894988       |                   | 812.8878         |
| 14     | 1792.8249        | 896.9161         |                   |                  | 13 | 1739.8096        | 870.408438       |                   | 870.4103         |
| 15     |                  |                  |                   |                  | 14 | 1867.8682        | 934.437738       |                   |                  |

# Tandem Mass Spectrum for $\beta$ B2: IILYENPNFTGK\*K (Orbitrap Velos)

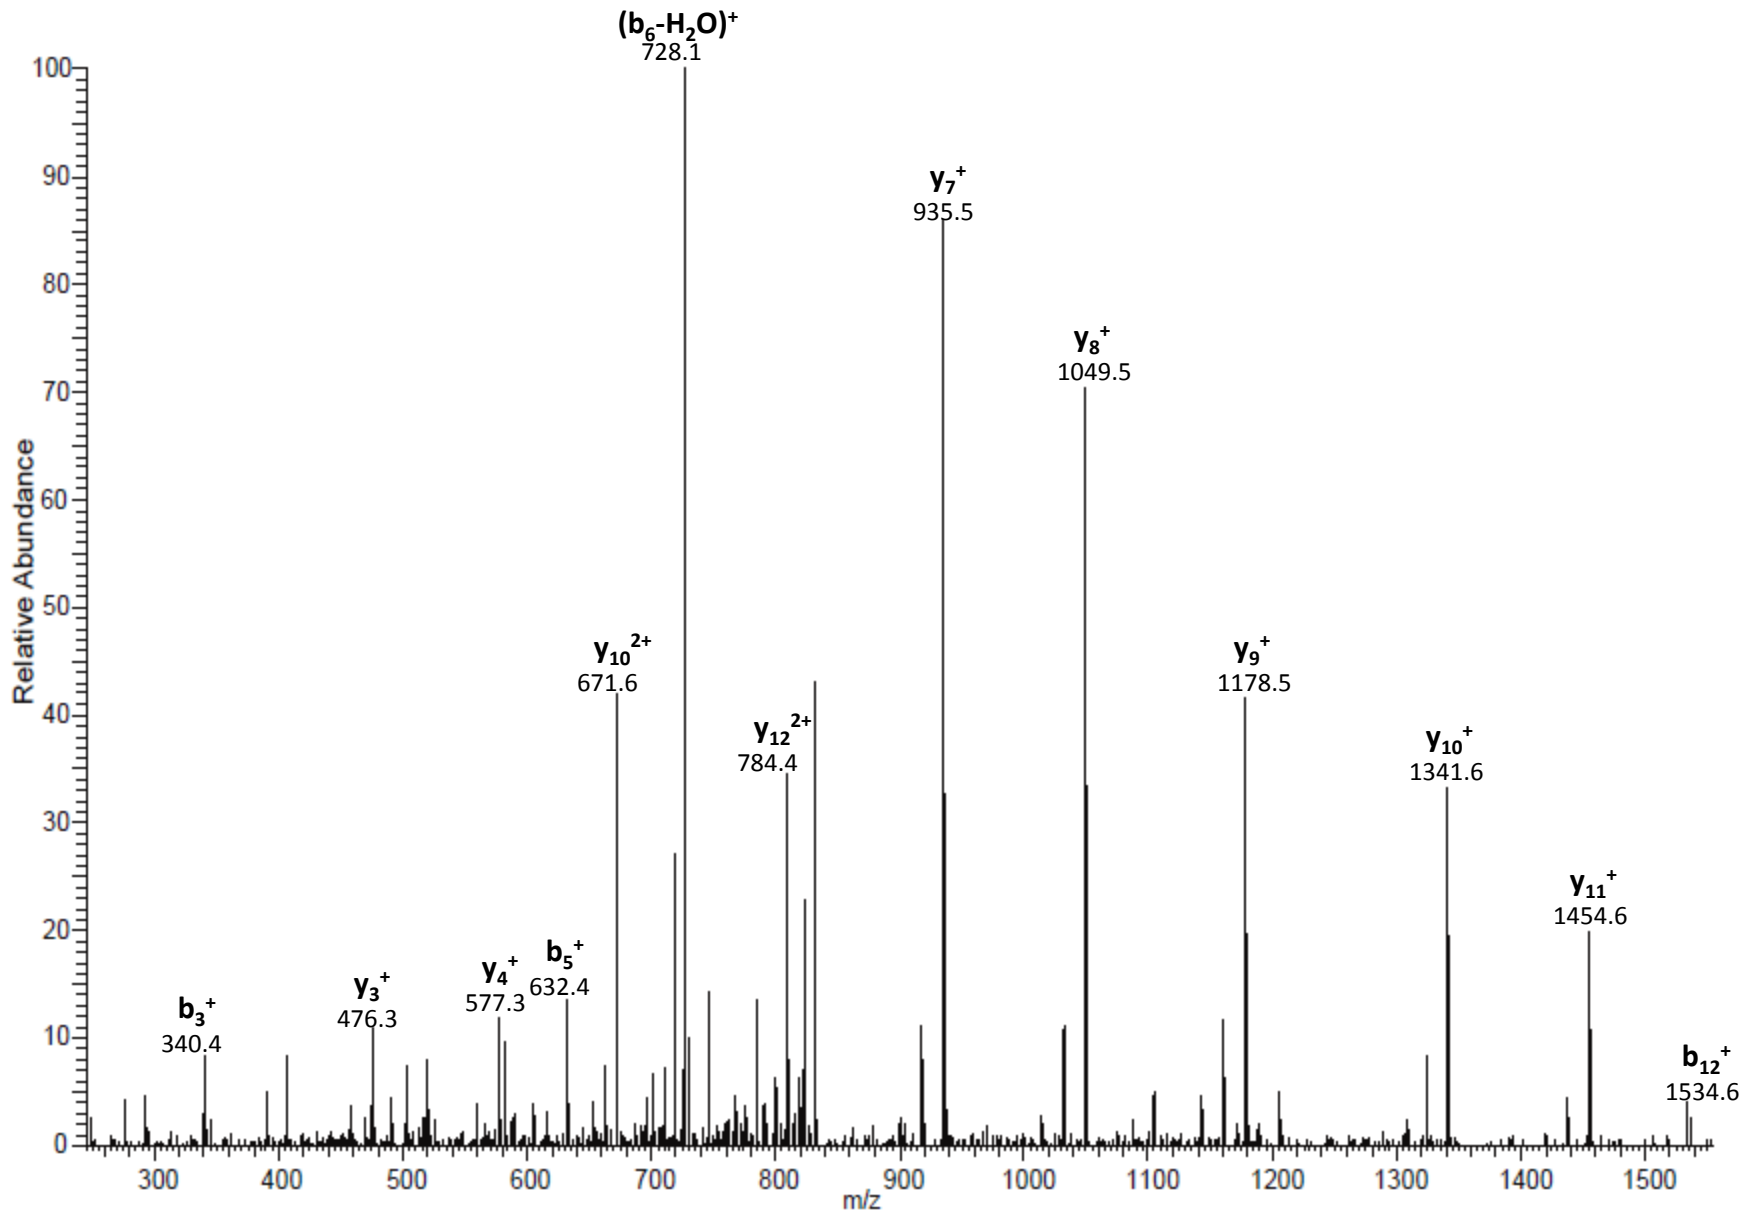

\* Indicates the site that is modified by CysGly

# Predicated and detected b- and y- ions for $\beta$ B2: IILYENPNFTGK\*K (Orbitrap Velos)

| b ions |                  |                  |                   |                  | y ions |                  |                  |                   |                  |
|--------|------------------|------------------|-------------------|------------------|--------|------------------|------------------|-------------------|------------------|
|        | Theoretical (+1) | Theoretical (+2) | Experimental (+1) | Experimental(+2) |        | Theoretical (+1) | Theoretical (+2) | Experimental (+1) | Experimental(+2) |
| 2      | 227.1754         | 114.0913         |                   |                  | 1      | 147.1128         | 74.060038        |                   |                  |
| 3      | 340.2595         | 170.6334         | 340.4             |                  | 2      | 419.2613         | 210.134288       | 419.3             |                  |
| 4      | 503.3228         | 252.1650         | 503.3             |                  | 3      | 476.2827         | 238.644988       | 476.3             |                  |
| 5      | 632.3654         | 316.6863         | 632.4             |                  | 4      | 577.3304         | 289.168838       | 577.3             |                  |
| 6      | 746.4083         | 373.7078         | 746.4             |                  | 5      | 724.3988         | 362.703038       | 724.5             |                  |
| 7      | 843.4611         | 422.2342         |                   |                  | 6      | 838.4418         | 419.724538       |                   |                  |
| 8      | 957.504          | 479.2556         |                   |                  | 7      | 935.4945         | 468.250888       | 935.5             |                  |
| 9      | 1104.5724        | 552.7898         |                   |                  | 8      | 1049.5374        | 525.272338       | 1049.5            |                  |
| 10     | 1205.6201        | 603.3137         | 1205.5            |                  | 9      | 1178.58          | 589.793638       | 1178.5            |                  |
| 11     | 1262.6416        | 631.8244         |                   |                  | 10     | 1341.6434        | 671.325338       | 1341.6            | 671.5            |
| 12     | 1534.79          | 767.8986         | 1534.6            |                  | 11     | 1454.7274        | 727.867338       | 1454.6            |                  |
|        |                  |                  |                   |                  |        | 1567.8115        | 784.409388       |                   | 784.4            |

# Tandem Mass Spectrum for $\beta$ B1: GEMFILEK\*GEYPR (Orbitrap Velos)

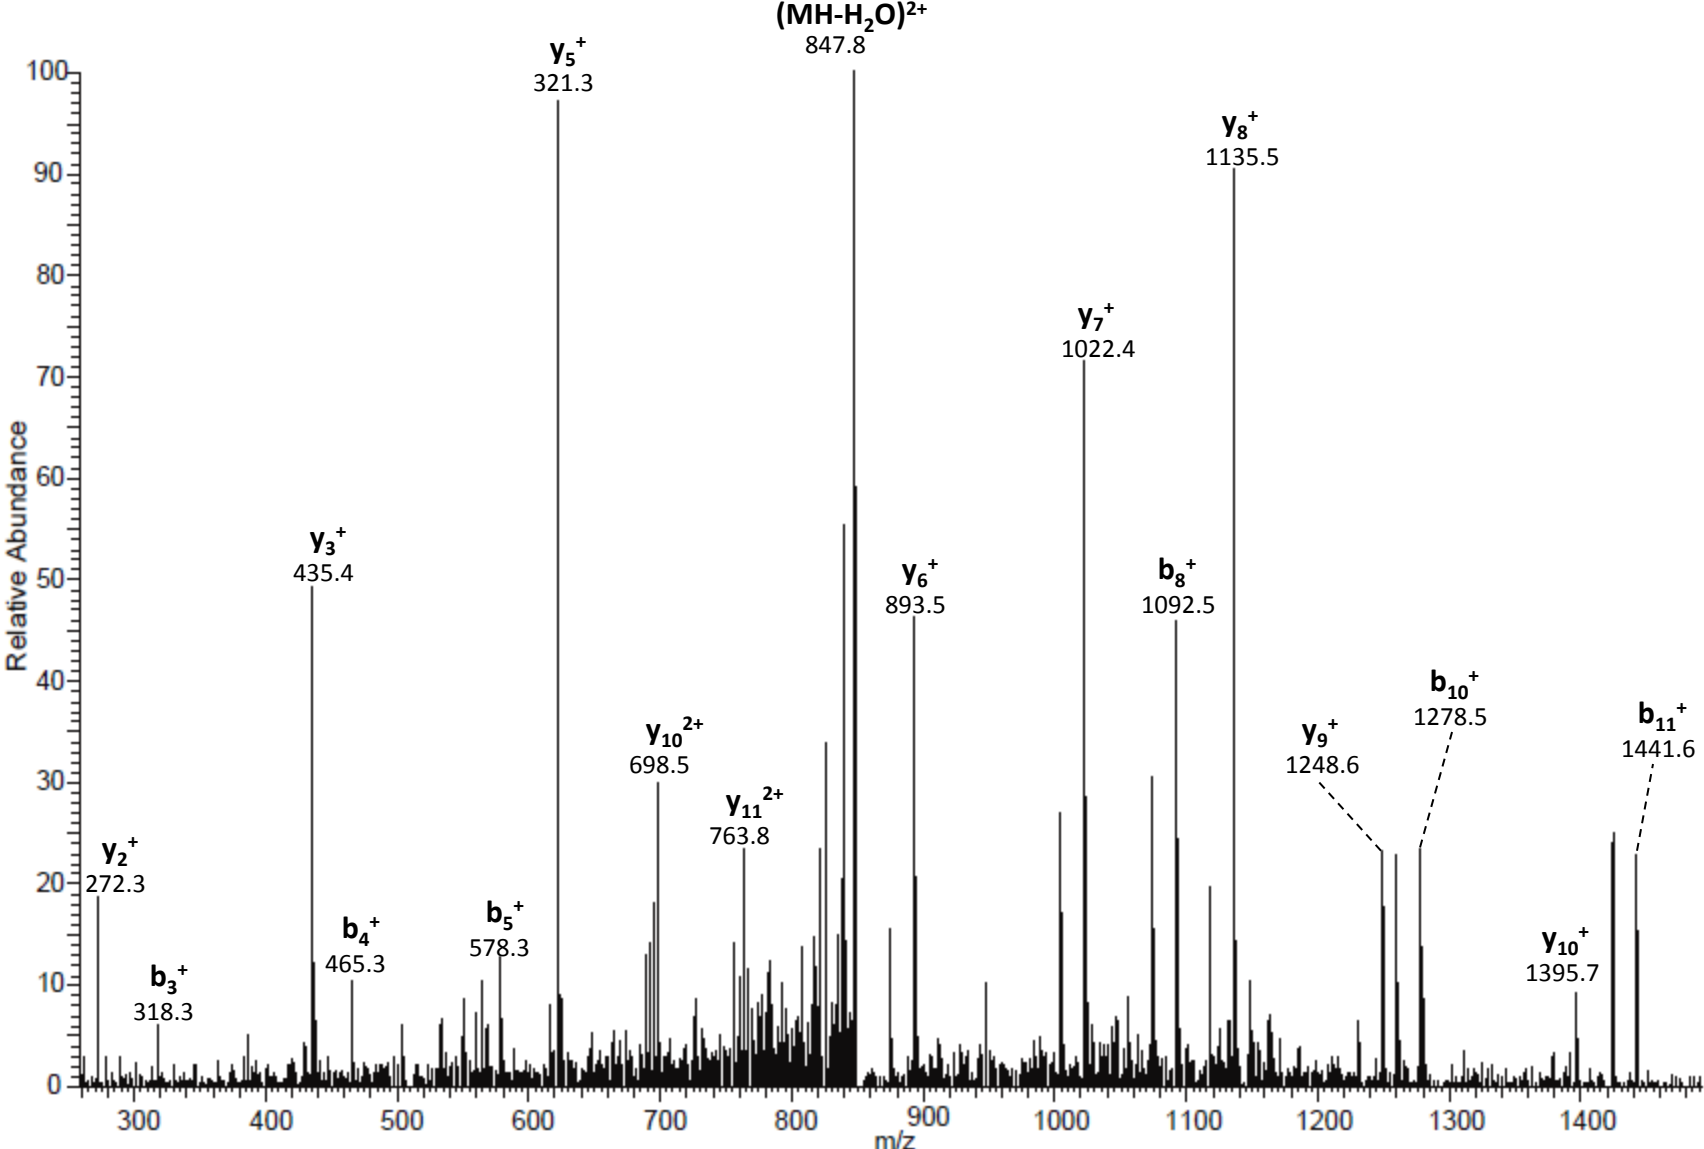

\* Indicates the site that is modified by CysGly

# Predicated and detected b- and $\gamma$ - ions for $\beta$ B1: GEMFILEK\*GEYPR (Orbitrap Velos)

| b ions |                  |                  |                   | y ions           |    |                  |                  |                   |                  |
|--------|------------------|------------------|-------------------|------------------|----|------------------|------------------|-------------------|------------------|
|        | Theoretical (+1) | Theoretical (+2) | Experimental (+1) | Experimental(+2) |    | Theoretical (+1) | Theoretical (+2) | Experimental (+1) | Experimental(+2) |
| 2      | 187.0713         | 94.0393          |                   |                  | 1  | 175.119          | 88.063138        |                   |                  |
| 3      | 318.1118         | 159.5595         | 318.3             |                  | 2  | 272.1717         | 136.589488       | 272.2             |                  |
| 4      | 465.1802         | 233.0937         | 465.3             |                  | 3  | 435.235          | 218.121138       | 435.3             |                  |
| 5      | 578.2643         | 289.6358         | 578.3             |                  | 4  | 564.2776         | 282.642438       | 564.3             |                  |
| 6      | 691.3484         | 346.1778         | 691.3             |                  | 5  | 621.2991         | 311.153188       | 621.3             |                  |
| 7      | 820.391          | 410.6991         | 820.4             |                  | 6  | 893.4476         | 447.227438       | 893.5             |                  |
| 8      | 1092.5394        | 546.7733         | 1092.5            |                  | 7  | 1022.4902        | 511.748738       | 1022.4            |                  |
| 9      | 1149.5609        | 575.2841         | 1149.3            |                  | 8  | 1135.5742        | 568.290738       | 1135.5            |                  |
| 10     | 1278.6035        | 639.8054         | 1278.5            |                  | 9  | 1248.6583        | 624.832788       | 1248.6            |                  |
| 11     | 1441.6668        | 721.3370         | 1441.6            |                  | 10 | 1395.7267        | 698.366988       | 1395.7            | 698.5            |
| 12     | 1538.7196        | 769.8634         |                   |                  | 11 | 1526.7672        | 763.887238       |                   | 763.7            |
|        |                  |                  |                   |                  | 12 | 1655.8098        | 828.408538       |                   |                  |

# Tandem Mass Spectrum for $\beta$ A3: ITIYDQENFQGK\*R (Orbitrap Velos)

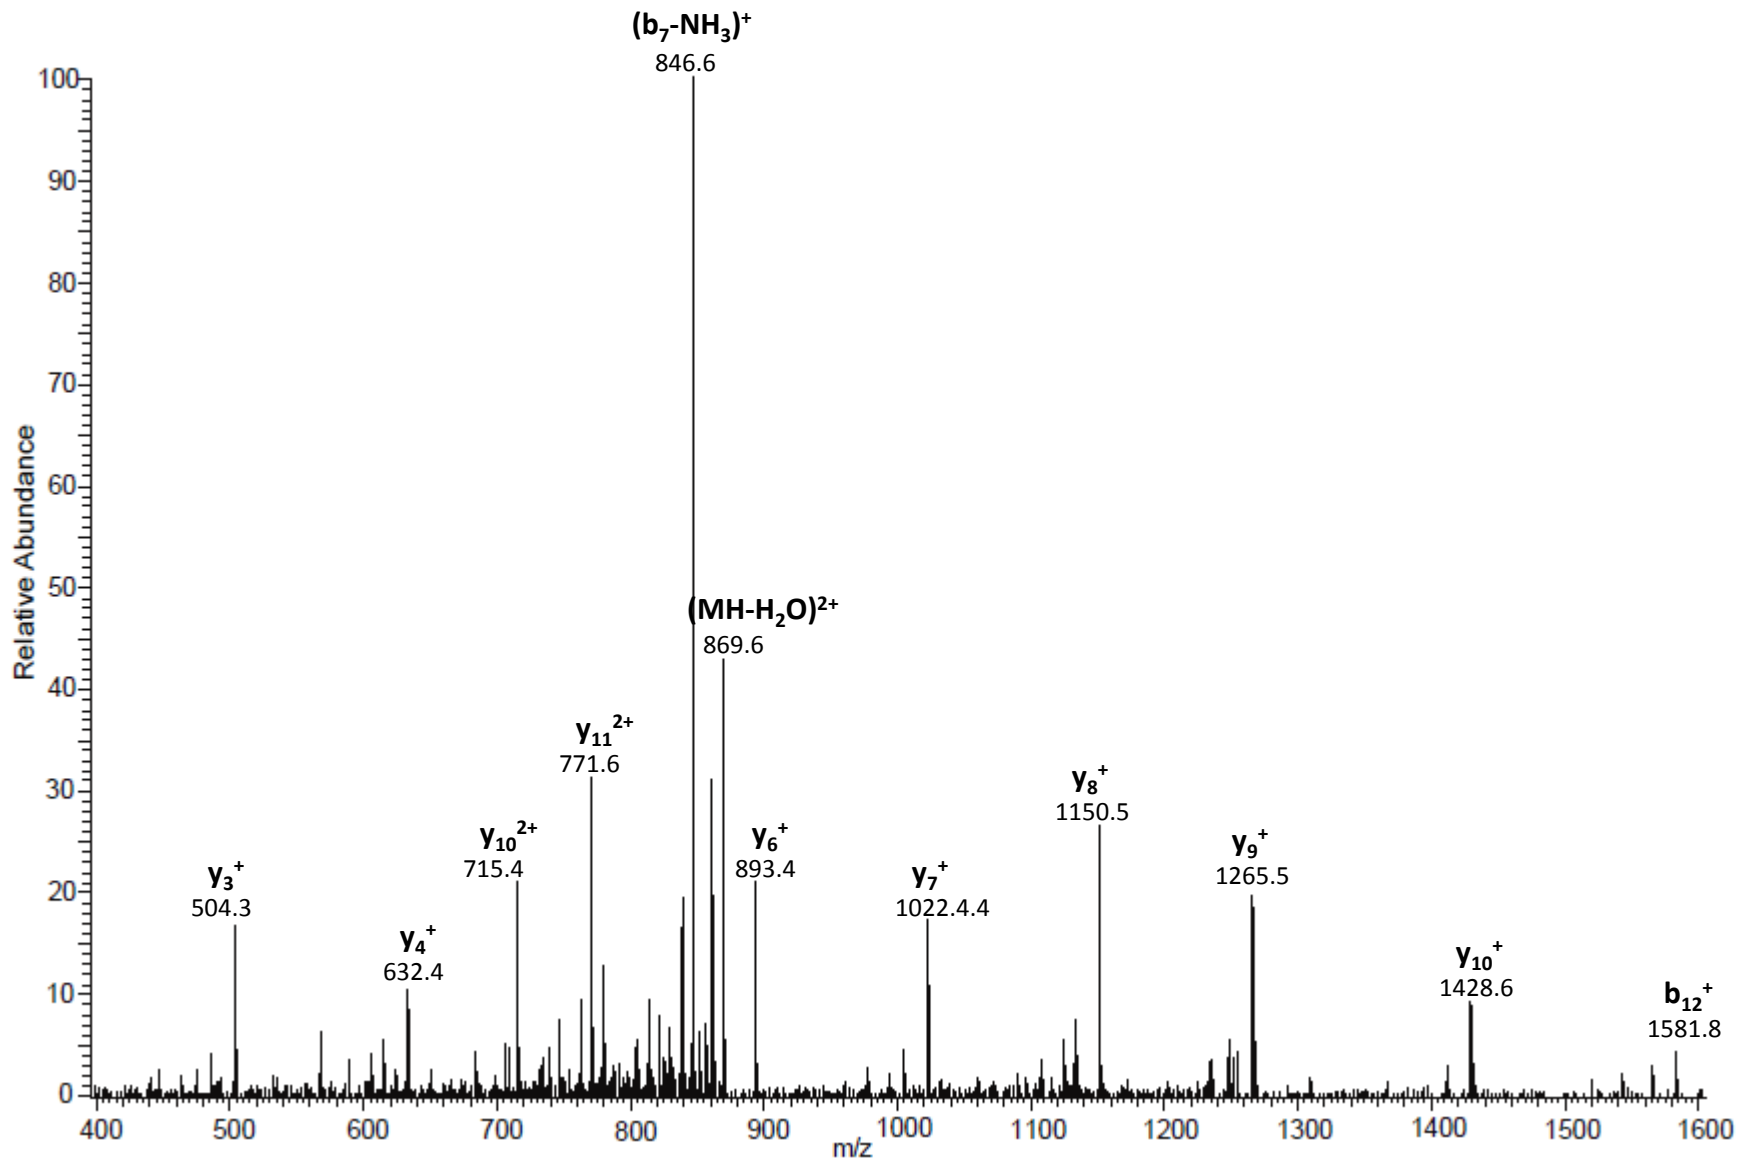

\* Indicates the site that is modified by CysGly

# Predicated and detected b- and y- ions for $\beta$ A3: ITIYDQENFQGK\*R (Orbitrap Velos)

| b ions |                  |                  |                   | y ions           |    |                  |                  |                   |                  |
|--------|------------------|------------------|-------------------|------------------|----|------------------|------------------|-------------------|------------------|
|        | Theoretical (+1) | Theoretical (+2) | Experimental (+1) | Experimental(+2) |    | Theoretical (+1) | Theoretical (+2) | Experimental (+1) | Experimental(+2) |
| 2      | 215.139          | 108.0731         |                   |                  | 1  | 175.119          | 88.063138        |                   |                  |
| 3      | 328.2231         | 164.6152         | 328.3             |                  | 2  | 447.2674         | 224.137338       | 447.5             |                  |
| 4      | 491.2864         | 246.1468         | 491.2             |                  | 3  | 504.2889         | 252.648088       | 504.3             |                  |
| 5      | 606.3134         | 303.6603         | 606.4             |                  | 4  | 632.3475         | 316.677388       | 632.4             |                  |
| 6      | 734.3719         | 367.6896         | 734.4             |                  | 5  | 779.4159         | 390.211588       | 779.4             |                  |
| 7      | 863.4145         | 432.2109         |                   |                  | 6  | 893.4588         | 447.233038       | 893.4             |                  |
| 8      | 977.4575         | 489.2324         | 977.5             |                  | 7  | 1022.5014        | 511.754338       | 1022.4            |                  |
| 9      | 1124.5259        | 562.7666         | 1124.5            |                  | 8  | 1150.56          | 575.783638       | 1150.5            |                  |
| 10     | 1252.5844        | 626.7958         | 1252.6            |                  | 9  | 1265.5869        | 633.297088       | 1265.5            |                  |
| 11     | 1309.6059        | 655.3066         | 1309.4            |                  | 10 | 1428.6502        | 714.828738       | 1428.6            | 715.4            |
| 12     | 1581.7544        | 791.3808         |                   |                  | 11 | 1541.7343        | 771.370788       | 1581.8            | 771.5            |
|        |                  |                  |                   |                  | 12 | 1642.782         | 821.894638       |                   |                  |



# Tandem Mass Spectrum for $\beta$ A3: MTIFEK\*ENFIGR (Orbitrap Velos)

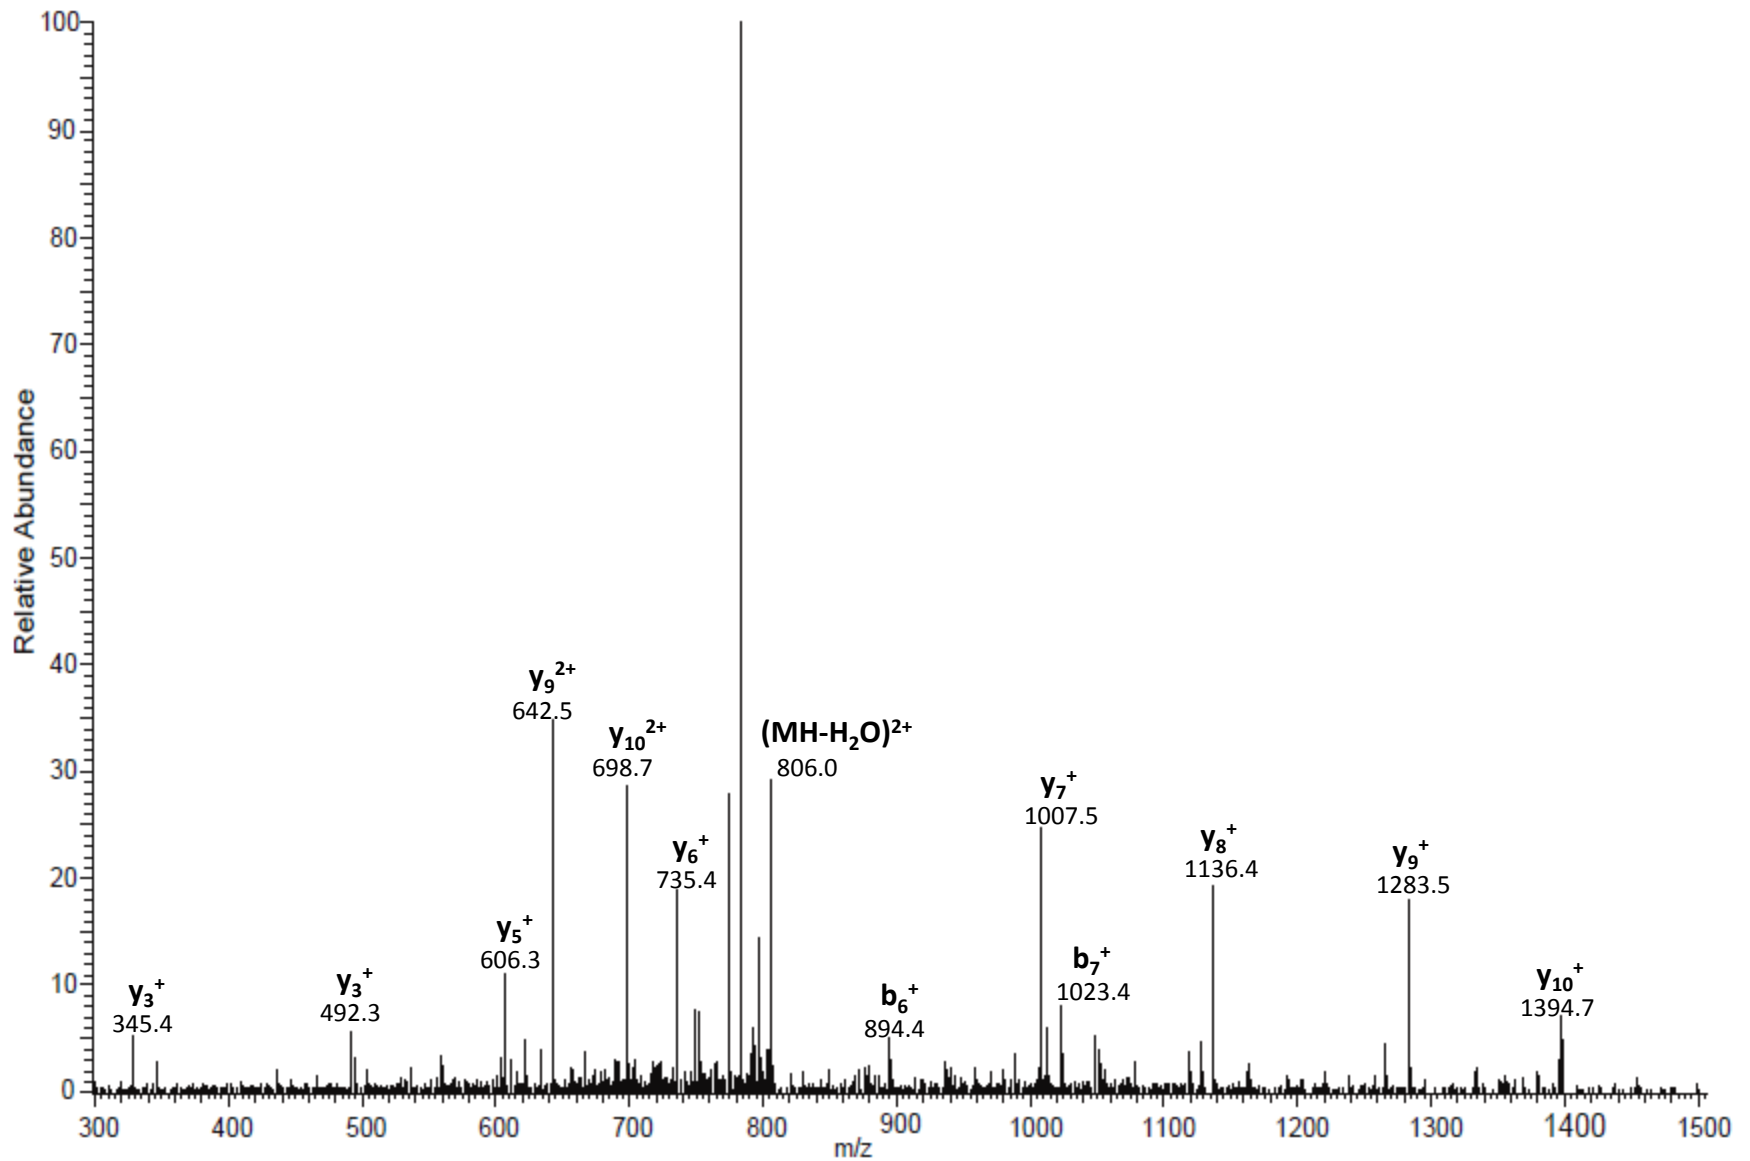

\* Indicates the site that is modified by CysGly

## Predicated and detected b- and $\gamma$ - ions for $\beta$ A3: MTIFEK\*ENFIGR (Orbitrap Velos)

| b ions |                  |                  |                   | y ions           |    |                  |                  |                   |                  |
|--------|------------------|------------------|-------------------|------------------|----|------------------|------------------|-------------------|------------------|
|        | Theoretical (+1) | Theoretical (+2) | Experimental (+1) | Experimental(+2) |    | Theoretical (+1) | Theoretical (+2) | Experimental (+1) | Experimental(+2) |
| 2      | 233.0954         | 117.0513         |                   |                  | 1  | 175.119          | 88.063138        |                   |                  |
| 3      | 346.1795         | 173.5934         |                   |                  | 2  | 232.1404         | 116.573838       | 232.2             |                  |
| 4      | 493.2479         | 247.1276         |                   |                  | 3  | 345.2245         | 173.115888       | 345.3             |                  |
| 5      | 622.2905         | 311.6489         |                   |                  | 4  | 492.2929         | 246.650088       | 492.3             |                  |
| 6      | 894.439          | 447.7231         |                   | 894.4            | 5  | 606.3358         | 303.671538       | 606.3             |                  |
| 7      | 1023.4816        | 512.2444         |                   | 1023.4           | 6  | 735.3784         | 368.192838       | 735.4             |                  |
| 8      | 1137.5245        | 569.2659         |                   |                  | 7  | 1007.5269        | 504.267088       | 1007.5            |                  |
| 9      | 1284.5929        | 642.8001         |                   |                  | 8  | 1136.5695        | 568.788388       | 1136.4            |                  |
| 10     | 1397.677         | 699.3421         |                   |                  | 9  | 1283.6379        | 642.322588       | 1283.5            | 642.5            |
| 11     | 1454.6984        | 727.8528         |                   | 1454.7           | 10 | 1396.7219        | 698.864588       | 1397.7            | 698.7            |
| 12     |                  |                  |                   |                  | 11 | 1497.7696        | 749.388438       |                   |                  |

# Tandem Mass Spectrum for $\beta$ A4: LTIFEQENFLGK\*K (Orbitrap Velos)

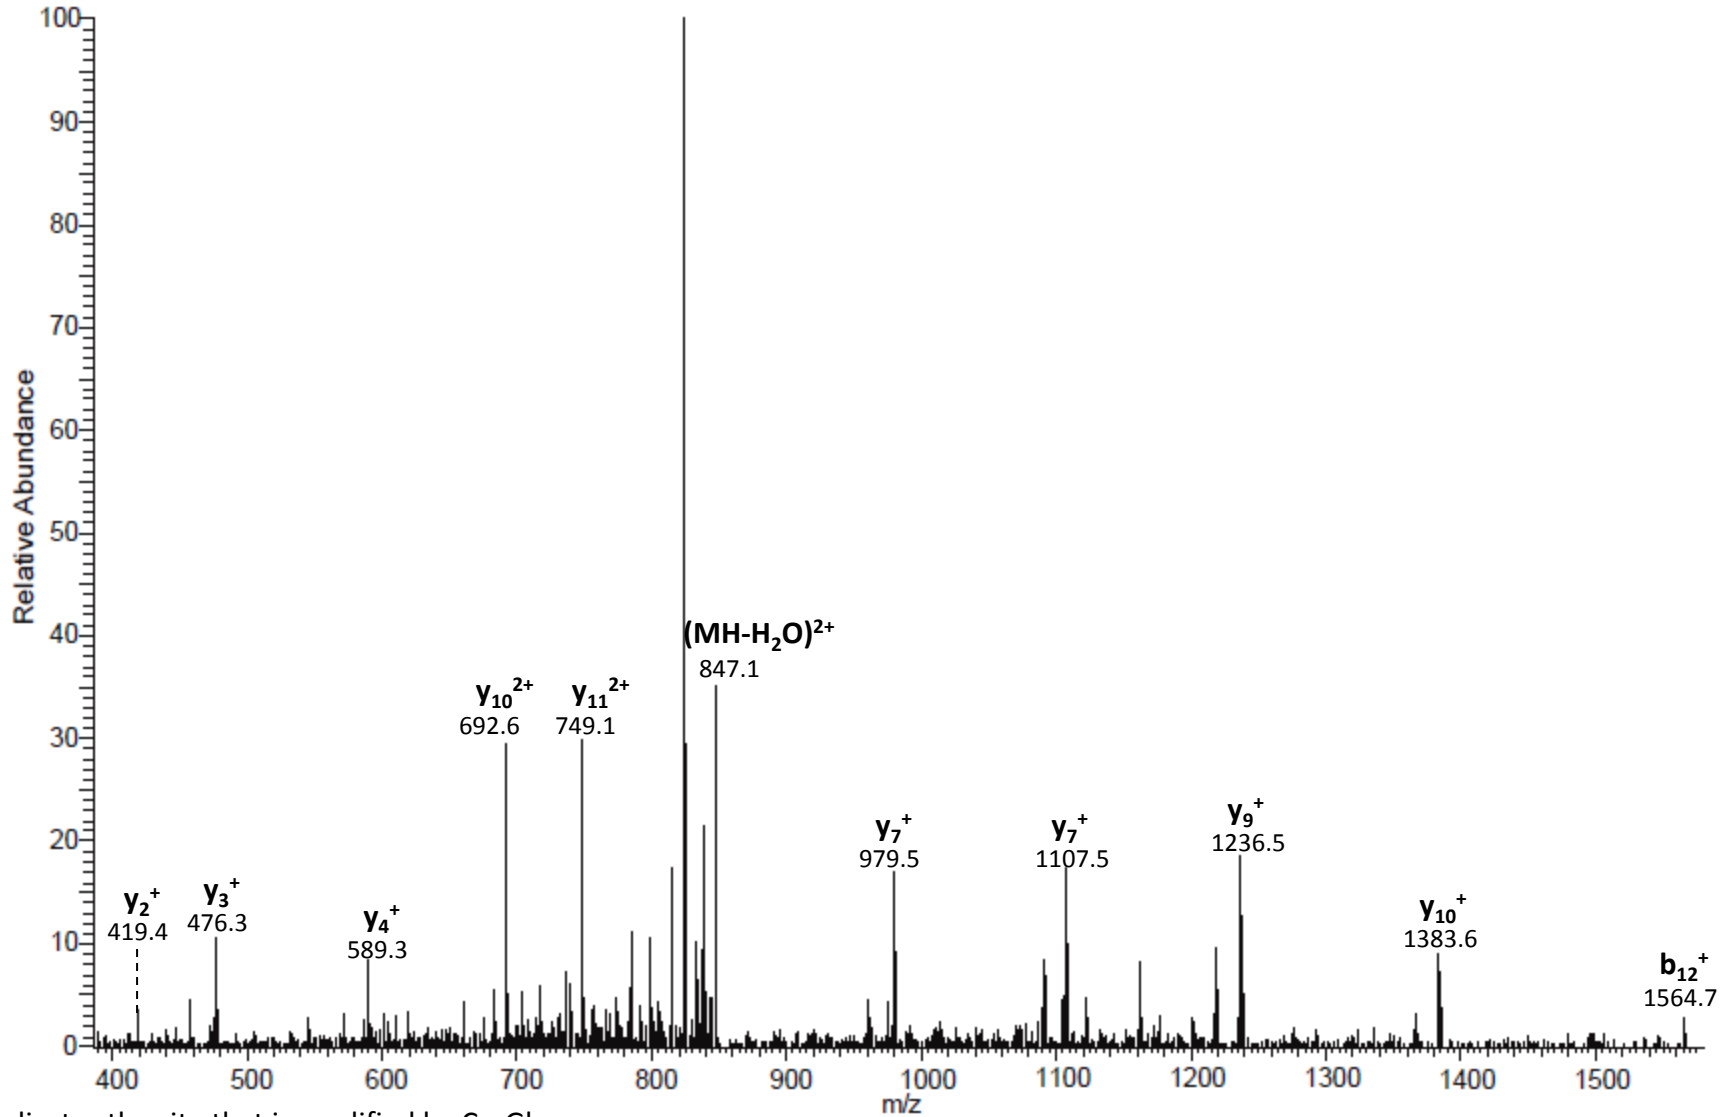

\* Indicates the site that is modified by CysGly

# Predicated and detected b- and y- ions for $\beta$ A4: LTIFEQENFLGK\*K (Orbitrap Velos)

| b ions |                  |                  |                   | y ions           |    |                  |                  |                   |                  |
|--------|------------------|------------------|-------------------|------------------|----|------------------|------------------|-------------------|------------------|
|        | Theoretical (+1) | Theoretical (+2) | Experimental (+1) | Experimental(+2) |    | Theoretical (+1) | Theoretical (+2) | Experimental (+1) | Experimental(+2) |
| 2      | 215.139          | 108.0731         |                   |                  | 1  | 147.1128         | 74.060038        |                   |                  |
| 3      | 328.2231         | 164.6152         | 328.3             |                  | 2  | 419.2613         | 210.134288       | 419.4             |                  |
| 4      | 475.2915         | 238.1494         | 475.5             |                  | 3  | 476.2827         | 238.644988       | 476.3             |                  |
| 5      | 604.3341         | 302.6707         | 604.4             |                  | 4  | 589.3668         | 295.187038       | 589.3             |                  |
| 6      | 732.3927         | 366.7000         |                   |                  | 5  | 736.4352         | 368.721238       | 736.4             |                  |
| 7      | 861.4353         | 431.2213         |                   |                  | 6  | 850.4781         | 425.742688       | 979.5             |                  |
| 8      | 975.4782         | 488.2427         |                   |                  | 7  | 979.5207         | 490.263988       | 1107.5            |                  |
| 9      | 1122.5466        | 561.7769         |                   |                  | 8  | 1107.5793        | 554.293288       | 1236.5            |                  |
| 10     | 1235.6307        | 618.3190         |                   |                  | 9  | 1236.6219        | 618.814588       | 1383.6            |                  |
| 11     | 1292.6521        | 646.8297         |                   |                  | 10 | 1383.6903        | 692.348788       |                   | 692.6            |
| 12     | 1564.8006        | 782.9039         | 1564.7            |                  | 11 | 1496.7744        | 748.890838       |                   | 749.1            |
|        |                  |                  |                   |                  |    | 1597.8221        | 799.414688       |                   |                  |

**Supplemental Table 1:** Demographics of lens donors, age, cause of death, cataract status and application of tissue.

| Donor age | Sex     | Cause of death        | Normal/diseased | Application       |
|-----------|---------|-----------------------|-----------------|-------------------|
| 22        | Female  | pneumonia             | Normal          | 1D-LC-MS/MS on QE |
| 53        | Male    | end-stage COPD        | Normal          | 1D-LC-MS/MS on QE |
| 50        | Male    | myocardial Infarction | Cataract        | 1D-LC-MS/MS on QE |
| 37        | Unknown | Unknown               | Normal          | MudPIT            |
| 58        | Unknown | Unknown               | Normal          | MudPIT            |

**Supplemental Table 2:** Lys residues of lens proteins that are modified by (DHA)Gly in the different fractions obtained from different aged lenses.

| Crystallins | Site | Lenses             |     |     |                    |     |     |                      |     |     |                             |                             |   |
|-------------|------|--------------------|-----|-----|--------------------|-----|-----|----------------------|-----|-----|-----------------------------|-----------------------------|---|
|             |      | 22 year-old Normal |     |     | 53 year-old Normal |     |     | 50 year-old Cataract |     |     | 37 year-old Normal (MudPIT) | 58 year-old Normal (MudPIT) |   |
|             |      | WSF                | USF | UIF | WSF                | USF | UIF | WSF                  | USF | UIF | UIF                         | UIF                         |   |
| $\gamma$ S  | K7   |                    |     |     | X                  |     |     | X                    |     |     |                             |                             | X |
|             | K14  |                    |     |     |                    |     |     | X                    |     |     |                             | X                           | X |
|             | K95  |                    |     |     |                    | X   |     |                      | X   | X   |                             | X                           |   |
|             | K145 |                    |     |     | X                  |     |     | X                    |     |     |                             | X                           | X |
|             | K159 |                    |     |     | X                  |     |     | X                    |     |     |                             |                             | X |
| $\beta$ B1  | K118 |                    |     |     |                    |     |     |                      |     |     |                             |                             | X |
|             | K187 |                    |     |     | X                  | X   |     | X                    | X   |     |                             | X                           | X |
| $\beta$ B2  | K120 |                    |     |     |                    |     |     |                      |     |     | X                           | X                           |   |
| $\beta$ A4  | K118 |                    |     |     |                    |     |     |                      |     |     | X                           | X                           |   |
| $\beta$ A3  | K44  |                    |     |     |                    |     |     |                      |     |     |                             |                             | X |
|             | K131 |                    |     |     |                    |     |     |                      |     |     |                             |                             | X |
| $\alpha$ B  | K90  |                    |     |     |                    | X   |     |                      |     | X   |                             |                             | X |
|             | K92  |                    |     |     |                    | X   |     |                      |     |     |                             |                             | X |
|             | K174 |                    |     |     |                    |     |     | X                    |     |     | X                           |                             | X |
| $\alpha$ A  | K70  |                    |     |     |                    | X   | X   |                      | X   | X   |                             |                             |   |
|             | K78  |                    |     |     |                    | X   |     |                      | X   | X   |                             |                             |   |
|             | K88  |                    |     |     |                    | X   |     |                      | X   |     |                             |                             |   |
|             | K99  |                    | X   |     |                    |     |     |                      |     |     |                             |                             |   |

X indicates modification was detected.

Proteins Identified in different aged lens samples

| Accession # | Gene Name     | Description                                               | Total Spectral Count (SC) | 22 year-old |          |          | 53 year-old |          |          | 50 year-old |          |          |
|-------------|---------------|-----------------------------------------------------------|---------------------------|-------------|----------|----------|-------------|----------|----------|-------------|----------|----------|
|             |               |                                                           |                           | WSF (SC)    | USF (SC) | UIF (SC) | WSF (SC)    | USF (SC) | UIF (SC) | WSF (SC)    | USF (SC) | UIF (SC) |
| Q13813      | SPTAN1        | Isoform 2 of Spectrin alpha chain, non-erythrocytic 1     | 1221                      | 191         | 316      | 171      | 84          | 100      | 90       | 101         | 99       | 69       |
| Q01082      | SPTBN1        | Spectrin beta chain, non-erythrocytic 1                   | 1010                      | 124         | 244      | 225      | 46          | 70       | 98       | 45          | 101      | 57       |
| O15020      | SPTBN2        | Spectrin beta chain, non-erythrocytic 2                   | 80                        | 4           | 17       | 16       | 5           | 9        | 11       | 1           | 11       | 6        |
| P11277      | SPTB          | Spectrin beta chain, erythrocytic                         | 48                        | 2           | 15       | 15       | 0           | 2        | 4        | 0           | 6        | 4        |
| Q15149      | PLEC          | Plectin                                                   | 381                       | 24          | 157      | 57       | 12          | 44       | 36       | 8           | 33       | 10       |
| Q12934      | BFSP1         | Filensin                                                  | 4366                      | 93          | 1611     | 248      | 51          | 939      | 448      | 53          | 711      | 212      |
| P07315      | CRYGC         | Gamma-crystallin C                                        | 3572                      | 314         | 229      | 69       | 902         | 411      | 367      | 775         | 357      | 148      |
| P07316      | CRYGB         | Gamma-crystallin B                                        | 1286                      | 139         | 85       | 23       | 250         | 158      | 106      | 295         | 179      | 51       |
| P11844      | CRYGA         | Gamma-crystallin A                                        | 55                        | 7           | 7        | 2        | 2           | 10       | 8        | 7           | 12       | 0        |
| Q13515      | BFSP2         | Phakinin                                                  | 3808                      | 127         | 1544     | 178      | 49          | 783      | 333      | 65          | 597      | 132      |
| P04264      | KRT1          | Keratin, type II cytoskeletal 1                           | 688                       | 22          | 31       | 166      | 62          | 67       | 112      | 32          | 34       | 162      |
| P35908      | KRT2          | Keratin, type II cytoskeletal 2 epidermal                 | 181                       | 4           | 4        | 36       | 20          | 15       | 39       | 11          | 8        | 44       |
| P13647      | KRT5          | Keratin, type II cytoskeletal 5                           | 78                        | 3           | 3        | 29       | 7           | 5        | 9        | 3           | 6        | 13       |
| P02538      | KRT6A         | Keratin, type II cytoskeletal 6A                          | 77                        | 3           | 3        | 27       | 9           | 5        | 9        | 3           | 5        | 13       |
| Q6KB66      | KRT80         | Keratin, type II cytoskeletal 80                          | 25                        | 0           | 1        | 3        | 5           | 5        | 5        | 1           | 1        | 4        |
| P35527      | KRT9          | Keratin, type I cytoskeletal 9                            | 312                       | 12          | 16       | 94       | 17          | 22       | 46       | 14          | 19       | 72       |
| P13645      | KRT10         | Keratin, type I cytoskeletal 10                           | 281                       | 3           | 6        | 66       | 24          | 26       | 65       | 9           | 15       | 67       |
| P02533      | KRT14         | Keratin, type I cytoskeletal 14                           | 42                        | 0           | 0        | 24       | 3           | 0        | 3        | 0           | 2        | 10       |
| P08779      | KRT16         | Keratin, type I cytoskeletal 16                           | 36                        | 0           | 0        | 16       | 7           | 2        | 4        | 0           | 1        | 6        |
| Q2M215      | KRT24         | Keratin, type I cytoskeletal 24                           | 10                        | 0           | 0        | 6        | 0           | 1        | 3        | 0           | 0        | 0        |
| Q92764      | KRT35         | Keratin, type I cuticular Ha5                             | 5                         | 0           | 0        | 1        | 0           | 0        | 1        | 0           | 0        | 3        |
| P22914      | CRYGS         | Beta-crystallin S                                         | 6728                      | 653         | 379      | 100      | 1637        | 677      | 702      | 1737        | 595      | 248      |
| Q9UFA7      | DKFZp434A0627 | Crystallin, gamma S, isoform CRA_a                        | 4441                      | 439         | 247      | 79       | 1067        | 443      | 478      | 1066        | 441      | 181      |
| P60709      | ACTB          | Actin, cytoplasmic 1                                      | 986                       | 159         | 307      | 50       | 32          | 114      | 67       | 48          | 178      | 31       |
| Q53G76      |               | Beta actin variant (Fragment)                             | 845                       | 121         | 257      | 50       | 32          | 105      | 67       | 46          | 136      | 31       |
| Q53GK6      |               | Beta actin variant (Fragment)                             | 844                       | 122         | 256      | 50       | 32          | 105      | 67       | 45          | 136      | 31       |
| P68032      | ACTC1         | Actin, alpha cardiac muscle 1                             | 433                       | 77          | 113      | 35       | 15          | 48       | 37       | 25          | 69       | 14       |
| Q658J3      | POTEE         | POTE ankyrin domain family member E                       | 276                       | 37          | 103      | 21       | 13          | 28       | 22       | 13          | 29       | 10       |
| Q562R1      | ACTBL2        | Beta-actin-like protein 2                                 | 246                       | 48          | 58       | 16       | 5           | 27       | 20       | 11          | 52       | 9        |
| Q562Z4      | ACT           | Actin-like protein (Fragment)                             | 154                       | 27          | 53       | 10       | 5           | 14       | 8        | 5           | 25       | 7        |
| Q562U2      | ACT           | Actin-like protein (Fragment)                             | 114                       | 16          | 36       | 14       | 5           | 9        | 10       | 5           | 12       | 7        |
| P53674      | CRYBB1        | Beta-crystallin B1                                        | 14144                     | 1220        | 803      | 304      | 3231        | 1815     | 1433     | 2993        | 1896     | 449      |
| A0A097      | CRYBA1        | Beta crystallin A3 chain transcript CN (Fragment)         | 9065                      | 1239        | 825      | 252      | 1456        | 1011     | 636      | 1922        | 1388     | 336      |
| A0A0H3      | CRYBA1        | Crystallin beta A3/A1 (Fragment)                          | 2086                      | 403         | 122      | 37       | 195         | 129      | 105      | 655         | 350      | 90       |
| P04075      | ALDOA         | Fructose-bisphosphate aldolase A                          | 653                       | 120         | 131      | 33       | 89          | 81       | 42       | 73          | 58       | 26       |
| B7Z3K9      |               | Fructose-bisphosphate aldolase                            | 323                       | 75          | 61       | 20       | 36          | 38       | 21       | 27          | 35       | 10       |
| B7Z1Z9      |               | Fructose-bisphosphate aldolase                            | 254                       | 53          | 46       | 14       | 27          | 33       | 21       | 20          | 30       | 10       |
| P00352      | ALDH1A1       | Retinal dehydrogenase 1                                   | 2259                      | 389         | 337      | 157      | 243         | 302      | 241      | 195         | 279      | 116      |
| Q53FB6      |               | Mitochondrial aldehyde dehydrogenase 2 variant (Fragment) | 67                        | 10          | 7        | 8        | 5           | 10       | 13       | 2           | 8        | 4        |
| P11171      | EPB41         | Protein 4.1                                               | 175                       | 0           | 18       | 74       | 0           | 1        | 40       | 0           | 1        | 41       |
| O43491      | EPB41L2       | Band 4.1-like protein 2                                   | 170                       | 0           | 13       | 68       | 0           | 3        | 43       | 0           | 4        | 39       |
| Q9H4G0      | EPB41L1       | Band 4.1-like protein 1                                   | 30                        | 0           | 3        | 14       | 0           | 0        | 4        | 0           | 0        | 9        |
| Q9Y2J2      | EPB41L3       | Band 4.1-like protein 3                                   | 22                        | 0           | 2        | 9        | 0           | 0        | 4        | 0           | 0        | 7        |
| P02489      | CRYAA         | Alpha-crystallin A chain                                  | 11571                     | 1365        | 2953     | 338      | 652         | 2042     | 1118     | 639         | 1995     | 469      |
| A0A0H3      | CRYBB2        | Beta-crystallin B2 (Fragment)                             | 4283                      | 831         | 607      | 282      | 636         | 431      | 339      | 531         | 407      | 219      |
| A0A0H3      | CRYBB2        | Beta-crystallin B2                                        | 3852                      | 723         | 508      | 257      | 546         | 392      | 301      | 515         | 397      | 213      |
| P08670      | VIM           | Vimentin                                                  | 308                       | 14          | 165      | 43       | 3           | 46       | 8        | 1           | 24       | 4        |
| P04406      | GAPDH         | Glyceraldehyde-3-phosphate dehydrogenase                  | 1330                      | 284         | 246      | 64       | 135         | 160      | 94       | 120         | 169      | 58       |
| P63104      | YWHAZ         | 14-3-3 protein zeta/delta                                 | 133                       | 27          | 16       | 10       | 13          | 13       | 25       | 10          | 15       | 4        |
| P62258      | YWHAE         | 14-3-3 protein epsilon                                    | 97                        | 27          | 25       | 4        | 10          | 6        | 3        | 6           | 13       | 3        |

|        |           |                                                            |       |      |      |     |      |      |      |     |      |     |
|--------|-----------|------------------------------------------------------------|-------|------|------|-----|------|------|------|-----|------|-----|
| P61981 | YWHAG     | 14-3-3 protein gamma                                       | 74    | 22   | 22   | 1   | 7    | 5    | 2    | 4   | 11   | 0   |
| P31946 | YWHAB     | 14-3-3 protein beta/alpha                                  | 37    | 14   | 9    | 1   | 2    | 0    | 1    | 3   | 7    | 0   |
| Q04917 | YWHAH     | 14-3-3 protein eta                                         | 31    | 9    | 10   | 1   | 2    | 0    | 1    | 2   | 6    | 0   |
| P07320 | CRYGD     | Gamma-crystallin D                                         | 3249  | 165  | 236  | 34  | 530  | 599  | 423  | 597 | 507  | 158 |
| P14618 | PKM       | Pyruvate kinase PKM                                        | 388   | 75   | 102  | 33  | 39   | 54   | 29   | 19  | 29   | 8   |
| P14618 | PKM       | Isoform M1 of Pyruvate kinase PKM                          | 362   | 71   | 98   | 34  | 38   | 46   | 27   | 16  | 25   | 7   |
| P06733 | ENO1      | Alpha-enolase                                              | 331   | 81   | 44   | 21  | 67   | 20   | 36   | 38  | 9    | 15  |
| P09104 | ENO2      | Gamma-enolase                                              | 97    | 25   | 6    | 2   | 20   | 8    | 13   | 14  | 4    | 5   |
| P48637 | GSS       | Glutathione synthetase                                     | 639   | 96   | 89   | 31  | 62   | 103  | 81   | 59  | 85   | 33  |
| Q99497 | PARK7     | Protein deglycase DJ-1                                     | 737   | 147  | 24   | 4   | 221  | 72   | 53   | 158 | 46   | 12  |
| P02511 | CRYAB     | Alpha-crystallin B chain                                   | 16304 | 2170 | 4054 | 404 | 1336 | 2603 | 1648 | 951 | 2399 | 739 |
| P80723 | BASP1     | Brain acid soluble protein 1                               | 1847  | 164  | 173  | 641 | 59   | 42   | 306  | 99  | 27   | 336 |
| V9HW89 | HEL-S-95n | Epididymis secretory sperm binding protein Li 95n          | 801   | 166  | 155  | 52  | 50   | 95   | 74   | 57  | 114  | 38  |
| Q00796 | SORD      | Sorbitol dehydrogenase                                     | 740   | 150  | 142  | 52  | 50   | 95   | 77   | 52  | 92   | 30  |
| P00558 | PGK1      | Phosphoglycerate kinase 1                                  | 619   | 98   | 44   | 36  | 79   | 87   | 99   | 58  | 55   | 63  |
| P26038 | MSN       | Moesin                                                     | 100   | 3    | 15   | 44  | 0    | 3    | 14   | 2   | 5    | 14  |
| P35241 | RDX       | Radixin                                                    | 100   | 1    | 8    | 37  | 0    | 3    | 24   | 2   | 2    | 23  |
| P53673 | CRYBA4    | Beta-crystallin A4                                         | 5656  | 851  | 744  | 123 | 953  | 776  | 409  | 895 | 763  | 142 |
| P48163 | ME1       | NADP-dependent malic enzyme                                | 246   | 59   | 43   | 6   | 39   | 28   | 19   | 25  | 18   | 9   |
| B4DX99 |           | Malic enzyme                                               | 169   | 41   | 28   | 3   | 30   | 19   | 15   | 20  | 6    | 7   |
| P07900 | HSP90AA1  | Heat shock protein HSP 90-alpha                            | 217   | 47   | 83   | 23  | 16   | 15   | 6    | 13  | 10   | 4   |
| P08238 | HSP90AB1  | Heat shock protein HSP 90-beta                             | 103   | 20   | 47   | 11  | 3    | 4    | 2    | 8   | 6    | 2   |
| Q6UWM7 | LCTL      | Lactase-like protein                                       | 365   | 0    | 30   | 164 | 0    | 3    | 83   | 0   | 3    | 82  |
| I6L894 | ANK2      | Ankyrin-2                                                  | 95    | 5    | 30   | 33  | 0    | 2    | 11   | 1   | 7    | 6   |
| Q12955 | ANK3      | Ankyrin-3                                                  | 18    | 1    | 4    | 9   | 0    | 0    | 1    | 0   | 2    | 1   |
| P21333 | FLNA      | Filamin-A                                                  | 112   | 13   | 33   | 22  | 5    | 9    | 10   | 6   | 10   | 4   |
| P29401 | TKT       | Transketolase                                              | 404   | 27   | 6    | 2   | 112  | 43   | 51   | 90  | 46   | 27  |
| P98160 | HSPG2     | Basement membrane-specific heparan sulfate proteoglycan    | 68    | 0    | 1    | 33  | 0    | 0    | 27   | 0   | 0    | 7   |
| O00410 | IPO5      | Importin-5                                                 | 225   | 14   | 60   | 28  | 6    | 30   | 39   | 5   | 35   | 8   |
| B7Z670 |           | cDNA FLJ61703, highly similar to Neuronal cell adhesion mo | 153   | 0    | 31   | 57  | 0    | 2    | 33   | 0   | 6    | 24  |
| Q9BXM0 | PRX       | Periaxin                                                   | 113   | 0    | 7    | 79  | 0    | 1    | 17   | 0   | 0    | 9   |
| P35237 | SERPINB6  | Serpin B6                                                  | 414   | 67   | 28   | 5   | 105  | 39   | 22   | 94  | 41   | 13  |
| P30041 | PRDX6     | Peroxiredoxin-6                                            | 267   | 73   | 53   | 45  | 9    | 7    | 36   | 20  | 5    | 19  |
| P30301 | MIP       | Lens fiber major intrinsic protein                         | 353   | 2    | 151  | 4   | 0    | 31   | 89   | 0   | 38   | 38  |
| P11216 | PYGB      | Glycogen phosphorylase, brain form                         | 144   | 15   | 51   | 13  | 6    | 25   | 12   | 2   | 16   | 4   |
| O75955 | FLOT1     | Flotillin-1                                                | 120   | 0    | 1    | 56  | 0    | 0    | 32   | 0   | 0    | 31  |
| Q14254 | FLOT2     | Flotillin-2                                                | 112   | 0    | 1    | 59  | 0    | 0    | 32   | 0   | 0    | 20  |
| P09936 | UCHL1     | Ubiquitin carboxyl-terminal hydrolase isozyme L1           | 379   | 123  | 34   | 24  | 46   | 35   | 45   | 42  | 15   | 15  |
| P00338 | LDHA      | L-lactate dehydrogenase A chain                            | 246   | 45   | 45   | 13  | 22   | 31   | 29   | 21  | 29   | 11  |
| P07195 | LDHB      | L-lactate dehydrogenase B chain                            | 43    | 8    | 9    | 6   | 2    | 4    | 4    | 3   | 4    | 3   |
| P05023 | ATP1A1    | Sodium/potassium-transporting ATPase subunit alpha-1       | 97    | 0    | 0    | 60  | 0    | 0    | 24   | 0   | 0    | 13  |
| P35555 | FBN1      | Fibrillin-1                                                | 58    | 0    | 0    | 49  | 0    | 0    | 0    | 0   | 0    | 9   |
| Q14974 | KPNB1     | Importin subunit beta-1                                    | 217   | 25   | 69   | 17  | 12   | 24   | 30   | 13  | 21   | 6   |
| B9EH95 | ARVCF     | Armadillo repeat gene deletes in velocardiofacial syndrome | 141   | 1    | 24   | 39  | 0    | 5    | 38   | 0   | 9    | 25  |
| P18669 | PGAM1     | Phosphoglycerate mutase 1                                  | 285   | 46   | 13   | 7   | 80   | 34   | 34   | 47  | 12   | 12  |
| P16152 | CBR1      | Carbonyl reductase [NADPH] 1                               | 627   | 98   | 74   | 40  | 40   | 82   | 100  | 46  | 77   | 70  |
| P31150 | GDI1      | Rab GDP dissociation inhibitor alpha                       | 283   | 37   | 56   | 3   | 17   | 46   | 49   | 14  | 46   | 15  |
| P50395 | GDI2      | Rab GDP dissociation inhibitor beta                        | 266   | 33   | 37   | 2   | 15   | 44   | 54   | 15  | 48   | 18  |
| Q01469 | FABP5     | Fatty acid-binding protein, epidermal                      | 231   | 35   | 26   | 17  | 30   | 37   | 23   | 22  | 34   | 7   |
| Q71U36 | TUBA1A    | Tubulin alpha-1A chain                                     | 348   | 45   | 89   | 16  | 14   | 55   | 44   | 10  | 51   | 24  |
| P68363 | TUBA1B    | Tubulin alpha-1B chain                                     | 306   | 44   | 75   | 14  | 11   | 47   | 40   | 9   | 46   | 20  |
| P35222 | CTNNB1    | Catenin beta-1                                             | 115   | 0    | 31   | 37  | 1    | 4    | 19   | 2   | 9    | 12  |
| A0A024 | CRYBB3    | Crystallin, beta B3, isoform CRA_a                         | 538   | 110  | 68   | 37  | 72   | 58   | 52   | 45  | 71   | 25  |
| P48165 | GJA8      | Gap junction alpha-8 protein                               | 364   | 0    | 6    | 182 | 0    | 0    | 71   | 0   | 0    | 105 |



|        |          |                                                             |     |    |    |    |    |    |    |    |    |    |
|--------|----------|-------------------------------------------------------------|-----|----|----|----|----|----|----|----|----|----|
| P63000 | RAC1     | Ras-related C3 botulinum toxin substrate 1                  | 277 | 0  | 16 | 99 | 2  | 12 | 63 | 1  | 3  | 81 |
| P60953 | CDC42    | Cell division control protein 42 homolog                    | 84  | 0  | 3  | 19 | 1  | 4  | 21 | 0  | 1  | 35 |
| Q8TCT0 | CERK     | Ceramide kinase                                             | 116 | 0  | 6  | 54 | 0  | 0  | 29 | 0  | 1  | 26 |
| P26232 | CTNNA2   | Isoform 2 of Catenin alpha-2                                | 39  | 0  | 7  | 20 | 0  | 0  | 11 | 0  | 0  | 1  |
| P04792 | HSPB1    | Heat shock protein beta-1                                   | 327 | 53 | 61 | 21 | 43 | 45 | 25 | 35 | 37 | 7  |
| Q93088 | BHMT     | Betaine--homocysteine S-methyltransferase 1                 | 188 | 15 | 9  | 5  | 15 | 32 | 51 | 17 | 36 | 8  |
| P60174 | TP11     | Triosephosphate isomerase                                   | 87  | 30 | 7  | 9  | 18 | 3  | 4  | 12 | 0  | 4  |
| P07738 | BPGM     | Bisphosphoglycerate mutase                                  | 289 | 50 | 24 | 14 | 57 | 20 | 15 | 66 | 27 | 16 |
| Q5TDP6 | LGSN     | Lengsin                                                     | 207 | 10 | 51 | 33 | 8  | 18 | 22 | 5  | 39 | 21 |
| P09488 | GSTM1    | Glutathione S-transferase Mu 1                              | 35  | 7  | 8  | 5  | 0  | 0  | 0  | 3  | 4  | 8  |
| P28161 | GSTM2    | Glutathione S-transferase Mu 2                              | 33  | 9  | 7  | 1  | 4  | 1  | 1  | 3  | 2  | 5  |
| P21266 | GSTM3    | Glutathione S-transferase Mu 3                              | 12  | 2  | 4  | 0  | 0  | 0  | 0  | 1  | 5  | 0  |
| P17858 | PFKL     | ATP-dependent 6-phosphofructokinase, liver type             | 118 | 17 | 25 | 7  | 3  | 16 | 10 | 5  | 29 | 6  |
| P61026 | RAB10    | Ras-related protein Rab-10                                  | 40  | 1  | 3  | 16 | 1  | 2  | 7  | 0  | 3  | 7  |
| Q9H0U4 | RAB1B    | Ras-related protein Rab-1B                                  | 40  | 1  | 1  | 19 | 0  | 0  | 9  | 0  | 1  | 9  |
| P62820 | RAB1A    | Ras-related protein Rab-1A                                  | 39  | 1  | 1  | 20 | 0  | 0  | 10 | 0  | 1  | 6  |
| Q15286 | RAB35    | Ras-related protein Rab-35                                  | 18  | 1  | 1  | 8  | 0  | 0  | 5  | 0  | 1  | 2  |
| Q6BCY4 | CYB5R2   | NADH-cytochrome b5 reductase 2                              | 97  | 36 | 2  | 0  | 23 | 5  | 7  | 16 | 6  | 2  |
| P49368 | CCT3     | T-complex protein 1 subunit gamma                           | 56  | 8  | 22 | 1  | 1  | 10 | 3  | 1  | 9  | 1  |
| P08572 | COL4A2   | Collagen alpha-2(IV) chain                                  | 51  | 0  | 0  | 26 | 0  | 0  | 16 | 0  | 0  | 9  |
| P22061 | PCMT1    | Protein-L-isoaspartate(D-aspartate)-O-methyltransferase     | 137 | 24 | 17 | 6  | 23 | 11 | 12 | 24 | 12 | 8  |
| Q13449 | LSAMP    | Limbic system-associated membrane protein                   | 132 | 0  | 20 | 46 | 0  | 1  | 32 | 0  | 2  | 31 |
| P61586 | RHOA     | Transforming protein RhoA                                   | 115 | 1  | 5  | 37 | 0  | 2  | 33 | 1  | 1  | 35 |
| Q9NT12 | ATP8A2   | Phospholipid-transporting ATPase 1B                         | 58  | 0  | 0  | 35 | 0  | 0  | 10 | 0  | 0  | 13 |
| P07437 | TUBB     | Tubulin beta chain                                          | 47  | 4  | 24 | 6  | 0  | 2  | 5  | 1  | 3  | 2  |
| Q8N3J6 | CADM2    | Cell adhesion molecule 2                                    | 122 | 0  | 9  | 55 | 0  | 0  | 29 | 0  | 1  | 28 |
| P30086 | PEBP1    | Phosphatidyethanolamine-binding protein 1                   | 119 | 44 | 7  | 4  | 21 | 6  | 13 | 17 | 5  | 2  |
| P13639 | EEF2     | Elongation factor 2                                         | 91  | 2  | 26 | 6  | 1  | 11 | 20 | 2  | 19 | 4  |
| P19022 | CDH2     | Cadherin-2                                                  | 83  | 4  | 7  | 46 | 0  | 0  | 17 | 0  | 0  | 9  |
| P36969 | GPX4     | Phospholipid hydroperoxide glutathione peroxidase, mitoch   | 67  | 0  | 0  | 21 | 0  | 0  | 20 | 1  | 0  | 25 |
| P32754 | HPD      | 4-hydroxyphenylpyruvate dioxygenase                         | 59  | 21 | 0  | 0  | 6  | 0  | 0  | 17 | 10 | 5  |
| P78371 | CCT2     | T-complex protein 1 subunit beta                            | 46  | 2  | 25 | 0  | 1  | 7  | 1  | 1  | 7  | 2  |
| O75781 | PALM     | Paralemmin-1                                                | 35  | 0  | 3  | 19 | 0  | 0  | 7  | 0  | 0  | 6  |
| O94856 | NFASC    | Isoform 12 of Neurofascin                                   | 35  | 0  | 1  | 20 | 0  | 0  | 10 | 0  | 0  | 4  |
| P53672 | CRYBA2   | Beta-crystallin A2                                          | 152 | 31 | 51 | 6  | 11 | 16 | 6  | 9  | 21 | 1  |
| Q9ULX7 | CA14     | Carbonic anhydrase 14                                       | 119 | 0  | 12 | 48 | 0  | 3  | 31 | 0  | 1  | 24 |
| P60842 | EIF4A1   | Eukaryotic initiation factor 4A-I                           | 79  | 5  | 22 | 4  | 1  | 9  | 10 | 0  | 24 | 4  |
| Q14240 | EIF4A2   | Eukaryotic initiation factor 4A-II                          | 79  | 7  | 24 | 4  | 1  | 8  | 12 | 0  | 19 | 4  |
| P32119 | PRDX2    | Peroxiredoxin-2                                             | 74  | 23 | 11 | 2  | 9  | 5  | 9  | 7  | 3  | 5  |
| Q06830 | PRDX1    | Peroxiredoxin-1                                             | 17  | 6  | 4  | 1  | 2  | 1  | 1  | 1  | 0  | 1  |
| P51149 | RAB7A    | Ras-related protein Rab-7a                                  | 75  | 0  | 0  | 41 | 0  | 0  | 18 | 0  | 0  | 16 |
| P00390 | GSR      | Glutathione reductase, mitochondrial                        | 74  | 15 | 4  | 3  | 7  | 8  | 7  | 15 | 11 | 4  |
| P62937 | PPIA     | Peptidyl-prolyl cis-trans isomerase A                       | 62  | 16 | 1  | 4  | 13 | 3  | 6  | 16 | 2  | 1  |
| P50453 | SERPINB9 | Serpin B9                                                   | 47  | 14 | 3  | 0  | 14 | 4  | 4  | 7  | 1  | 0  |
| P30740 | SERPINB1 | Leukocyte elastase inhibitor                                | 17  | 1  | 0  | 0  | 8  | 1  | 1  | 5  | 1  | 0  |
| Q53FA7 | TP53I3   | Quinone oxidoreductase PIG3                                 | 74  | 27 | 10 | 16 | 7  | 1  | 6  | 3  | 3  | 1  |
| Q14764 | MVP      | Major vault protein                                         | 64  | 6  | 20 | 0  | 2  | 12 | 7  | 6  | 10 | 1  |
| P20340 | RAB6A    | Ras-related protein Rab-6A                                  | 64  | 0  | 1  | 38 | 0  | 0  | 17 | 0  | 0  | 8  |
| P00387 | CYB5R3   | NADH-cytochrome b5 reductase 3                              | 46  | 0  | 2  | 25 | 0  | 0  | 11 | 0  | 0  | 8  |
| P55786 | NPEPPS   | Puromycin-sensitive aminopeptidase                          | 44  | 7  | 9  | 8  | 1  | 10 | 3  | 1  | 3  | 2  |
| Q14204 | DYNC1H1  | Cytoplasmic dynein 1 heavy chain 1                          | 40  | 0  | 11 | 0  | 0  | 9  | 11 | 0  | 5  | 4  |
| P63092 | GNAS     | Guanine nucleotide-binding protein G(s) subunit alpha isofo | 29  | 0  | 2  | 12 | 0  | 0  | 10 | 0  | 0  | 5  |
| P08754 | GNAI3    | Guanine nucleotide-binding protein G(k) subunit alpha       | 25  | 0  | 2  | 15 | 0  | 0  | 6  | 0  | 0  | 2  |
| P02792 | FTL      | Ferritin light chain                                        | 117 | 8  | 2  | 0  | 28 | 7  | 1  | 48 | 14 | 9  |

|        |         |                                                               |     |    |    |    |    |    |    |    |    |    |
|--------|---------|---------------------------------------------------------------|-----|----|----|----|----|----|----|----|----|----|
| P06744 | GPI     | Glucose-6-phosphate isomerase                                 | 100 | 16 | 12 | 6  | 7  | 15 | 18 | 7  | 16 | 3  |
| Q9Y6H8 | GJA3    | Gap junction alpha-3 protein                                  | 86  | 0  | 0  | 31 | 0  | 0  | 27 | 0  | 2  | 26 |
| P48643 | CCT5    | T-complex protein 1 subunit epsilon                           | 55  | 0  | 16 | 0  | 0  | 11 | 13 | 0  | 13 | 2  |
| P50991 | CCT4    | T-complex protein 1 subunit delta                             | 26  | 1  | 8  | 0  | 0  | 4  | 2  | 1  | 8  | 2  |
| P22392 | NME2    | Isoform 3 of Nucleoside diphosphate kinase B                  | 51  | 25 | 0  | 1  | 6  | 0  | 0  | 14 | 3  | 2  |
| P13591 | NCAM1   | Neural cell adhesion molecule 1                               | 41  | 0  | 1  | 28 | 0  | 0  | 8  | 0  | 0  | 4  |
| P38606 | ATP6V1A | V-type proton ATPase catalytic subunit A                      | 40  | 8  | 21 | 0  | 3  | 4  | 1  | 0  | 3  | 0  |
| Q9BY67 | CADM1   | Cell adhesion molecule 1                                      | 29  | 0  | 0  | 7  | 0  | 0  | 10 | 0  | 0  | 12 |
| Q00610 | CLTC    | Clathrin heavy chain 1                                        | 18  | 1  | 10 | 3  | 0  | 1  | 2  | 0  | 1  | 0  |
| P00441 | SOD1    | Superoxide dismutase [Cu-Zn]                                  | 140 | 58 | 9  | 5  | 26 | 0  | 0  | 39 | 1  | 2  |
| P09382 | LGALS1  | Galectin-1                                                    | 115 | 18 | 21 | 17 | 9  | 14 | 16 | 5  | 6  | 9  |
| P00918 | CA2     | Carbonic anhydrase 2                                          | 106 | 19 | 21 | 2  | 8  | 17 | 14 | 5  | 9  | 11 |
| P15121 | AKR1B1  | Aldose reductase                                              | 103 | 23 | 18 | 5  | 6  | 8  | 14 | 7  | 16 | 6  |
| P11166 | SLC2A1  | Solute carrier family 2, facilitated glucose transporter memt | 78  | 0  | 0  | 37 | 0  | 0  | 14 | 0  | 0  | 27 |
| P52209 | PGD     | 6-phosphogluconate dehydrogenase, decarboxylating             | 68  | 11 | 9  | 5  | 7  | 9  | 12 | 5  | 6  | 4  |
| B4DL86 |         | 6-phosphogluconate dehydrogenase, decarboxylating             | 62  | 7  | 8  | 5  | 6  | 9  | 11 | 6  | 6  | 4  |
| P61204 | ARF3    | ADP-ribosylation factor 3                                     | 63  | 5  | 10 | 12 | 6  | 3  | 14 | 6  | 3  | 4  |
| P16930 | FAH     | Fumarylacetoacetase                                           | 61  | 7  | 1  | 0  | 21 | 6  | 3  | 19 | 1  | 3  |
| P23141 | CES1    | Liver carboxylesterase 1                                      | 53  | 8  | 1  | 2  | 12 | 3  | 8  | 11 | 2  | 6  |
| Q9HCJ1 | ANKH    | Progressive ankylosis protein homolog                         | 52  | 0  | 0  | 3  | 0  | 0  | 33 | 0  | 0  | 16 |
| Q8N126 | CADM3   | Cell adhesion molecule 3                                      | 51  | 0  | 6  | 27 | 0  | 1  | 10 | 0  | 1  | 6  |
| Q86VP6 | CAND1   | Cullin-associated NEDD8-dissociated protein 1                 | 50  | 3  | 7  | 1  | 1  | 9  | 16 | 2  | 5  | 6  |
| P11233 | RALA    | Ras-related protein Ral-A                                     | 48  | 0  | 0  | 25 | 0  | 0  | 14 | 0  | 0  | 9  |
| Q5T9C9 | PIP5KL1 | Phosphatidylinositol 4-phosphate 5-kinase-like protein 1      | 42  | 0  | 2  | 22 | 0  | 0  | 13 | 0  | 0  | 5  |
| Q9BX67 | JAM3    | Junctional adhesion molecule C                                | 22  | 0  | 0  | 14 | 0  | 0  | 8  | 0  | 0  | 0  |
| Q03135 | CAV1    | Caveolin-1                                                    | 89  | 0  | 5  | 36 | 0  | 1  | 34 | 0  | 0  | 13 |
| Q14019 | COTL1   | Coactosin-like protein                                        | 74  | 14 | 11 | 0  | 4  | 15 | 16 | 3  | 8  | 3  |
| P02462 | COL4A1  | Collagen alpha-1(IV) chain                                    | 62  | 0  | 0  | 24 | 0  | 1  | 24 | 0  | 0  | 13 |
| A2RU48 | SMCO3   | Single-pass membrane and coiled-coil domain-containing pr     | 44  | 0  | 6  | 13 | 0  | 0  | 12 | 0  | 2  | 11 |
| P30566 | ADSL    | Adenylosuccinate lyase                                        | 34  | 7  | 2  | 3  | 2  | 3  | 7  | 3  | 3  | 4  |
| P13489 | RNH1    | Ribonuclease inhibitor                                        | 30  | 2  | 14 | 0  | 3  | 3  | 4  | 0  | 4  | 0  |
| P17987 | TCP1    | T-complex protein 1 subunit alpha                             | 28  | 1  | 12 | 0  | 1  | 6  | 4  | 1  | 3  | 0  |
| P07355 | ANXA2   | Annexin A2                                                    | 24  | 4  | 5  | 8  | 3  | 0  | 3  | 1  | 0  | 0  |
| Q8IXS6 | PALM2   | Paralemmin-2                                                  | 18  | 0  | 0  | 13 | 0  | 0  | 4  | 0  | 0  | 1  |
| P23526 | AHCY    | Adenosylhomocysteinase                                        | 98  | 25 | 9  | 6  | 14 | 4  | 7  | 15 | 6  | 12 |
| P11413 | G6PD    | Glucose-6-phosphate 1-dehydrogenase                           | 73  | 7  | 25 | 0  | 4  | 13 | 9  | 3  | 10 | 2  |
| P40227 | CCT6A   | T-complex protein 1 subunit zeta                              | 69  | 4  | 23 | 1  | 2  | 17 | 10 | 1  | 9  | 2  |
| P58546 | MTPN    | Myotrophin                                                    | 62  | 14 | 10 | 1  | 10 | 6  | 8  | 7  | 6  | 0  |
| P40925 | MDH1    | Malate dehydrogenase, cytoplasmic                             | 51  | 24 | 2  | 6  | 8  | 1  | 1  | 6  | 0  | 3  |
| P68104 | EEF1A1  | Elongation factor 1-alpha 1                                   | 47  | 3  | 15 | 7  | 0  | 8  | 6  | 0  | 8  | 0  |
| P32320 | CDA     | Cytidine deaminase                                            | 47  | 9  | 4  | 1  | 20 | 6  | 4  | 2  | 0  | 1  |
| P22748 | CA4     | Carbonic anhydrase 4                                          | 38  | 0  | 4  | 18 | 0  | 0  | 8  | 0  | 0  | 8  |
| P13798 | APEH    | Acylamino-acid-releasing enzyme                               | 30  | 5  | 0  | 2  | 11 | 0  | 1  | 8  | 0  | 3  |
| P61019 | RAB2A   | Ras-related protein Rab-2A                                    | 28  | 0  | 0  | 18 | 0  | 0  | 4  | 0  | 0  | 6  |
| Q9NUQ9 | FAM49B  | Protein FAM49B                                                | 21  | 2  | 1  | 10 | 0  | 0  | 1  | 0  | 0  | 7  |
| Q96KP4 | CNDP2   | Cytosolic non-specific dipeptidase                            | 21  | 9  | 6  | 0  | 3  | 0  | 0  | 2  | 0  | 1  |
| P10768 | ESD     | S-formylglutathione hydrolase                                 | 20  | 8  | 0  | 0  | 5  | 0  | 1  | 4  | 1  | 1  |
| Q9GZM7 | TINAGL1 | Tubulointerstitial nephritis antigen-like                     | 15  | 0  | 1  | 12 | 0  | 0  | 2  | 0  | 0  | 0  |
| P34913 | EPHX2   | Bifunctional epoxide hydrolase 2                              | 73  | 8  | 6  | 5  | 8  | 6  | 33 | 3  | 1  | 3  |
| P54920 | NAPA    | Alpha-soluble NSF attachment protein                          | 57  | 4  | 21 | 7  | 1  | 6  | 5  | 3  | 5  | 5  |
| Q15907 | RAB11B  | Ras-related protein Rab-11B                                   | 56  | 2  | 2  | 22 | 1  | 1  | 13 | 0  | 5  | 10 |
| P60891 | PRPS1   | Ribose-phosphate pyrophosphokinase 1                          | 44  | 4  | 15 | 0  | 1  | 8  | 4  | 3  | 8  | 1  |
| P01034 | CST3    | Cystatin-C                                                    | 41  | 0  | 1  | 2  | 0  | 1  | 23 | 0  | 0  | 14 |
| Q15124 | PGM5    | Phosphoglucomutase-like protein 5                             | 33  | 3  | 5  | 2  | 2  | 4  | 7  | 0  | 8  | 2  |

|        |           |                                                             |     |    |    |    |    |    |    |    |   |    |
|--------|-----------|-------------------------------------------------------------|-----|----|----|----|----|----|----|----|---|----|
| P61020 | RAB5B     | Ras-related protein Rab-5B                                  | 29  | 0  | 1  | 16 | 1  | 0  | 7  | 0  | 0 | 4  |
| P08758 | ANXA5     | Annexin A5                                                  | 28  | 5  | 11 | 3  | 0  | 2  | 2  | 1  | 1 | 3  |
| Q6NZ12 | PTRF      | Polymerase I and transcript release factor                  | 28  | 0  | 10 | 8  | 0  | 3  | 1  | 0  | 5 | 1  |
| O15498 | YKT6      | Synaptobrevin homolog YKT6                                  | 22  | 0  | 2  | 14 | 0  | 0  | 2  | 0  | 0 | 4  |
| P62834 | RAP1A     | Ras-related protein Rap-1A                                  | 19  | 0  | 1  | 3  | 0  | 1  | 9  | 0  | 0 | 5  |
| O60664 | PLIN3     | Perilipin-3                                                 | 9   | 1  | 7  | 1  | 0  | 0  | 0  | 0  | 0 | 0  |
| P55344 | LIM2      | Lens fiber membrane intrinsic protein                       | 125 | 0  | 16 | 51 | 0  | 3  | 21 | 0  | 1 | 33 |
| P55344 | LIM2      | Isoform 2 of Lens fiber membrane intrinsic protein          | 123 | 0  | 16 | 47 | 0  | 3  | 21 | 0  | 1 | 35 |
| P55064 | AQP5      | Aquaporin-5                                                 | 75  | 0  | 0  | 41 | 0  | 0  | 23 | 0  | 0 | 11 |
| Q99426 | TBCB      | Tubulin-folding cofactor B                                  | 34  | 6  | 15 | 2  | 1  | 3  | 2  | 1  | 3 | 1  |
| O94760 | DDAH1     | N(G),N(G)-dimethylarginine dimethylaminohydrolase 1         | 34  | 2  | 2  | 10 | 0  | 0  | 12 | 1  | 0 | 7  |
| Q9UL25 | RAB21     | Ras-related protein Rab-21                                  | 30  | 0  | 2  | 17 | 0  | 0  | 6  | 0  | 0 | 5  |
| P10909 | CLU       | Clusterin                                                   | 28  | 0  | 2  | 9  | 0  | 1  | 10 | 0  | 0 | 6  |
| P05026 | ATP1B1    | Sodium/potassium-transporting ATPase subunit beta-1         | 27  | 0  | 0  | 15 | 0  | 0  | 6  | 0  | 0 | 6  |
| Q01518 | CAP1      | Adenylyl cyclase-associated protein 1                       | 25  | 0  | 7  | 0  | 2  | 8  | 4  | 0  | 4 | 0  |
| P01116 | KRAS      | Isoform 2B of GTPase KRas                                   | 19  | 0  | 0  | 14 | 0  | 0  | 1  | 0  | 0 | 4  |
| P01112 | HRAS      | GTPase HRas                                                 | 12  | 0  | 0  | 10 | 0  | 0  | 0  | 0  | 0 | 2  |
| P62805 | HIST1H4A  | Histone H4                                                  | 21  | 0  | 0  | 16 | 0  | 0  | 5  | 0  | 0 | 0  |
| Q08257 | CRYZ      | Quinone oxidoreductase                                      | 20  | 3  | 5  | 2  | 4  | 1  | 0  | 2  | 3 | 0  |
| P11142 | HSPA8     | Heat shock cognate 71 kDa protein                           | 13  | 3  | 5  | 1  | 1  | 1  | 0  | 2  | 0 | 0  |
| O15230 | LAMA5     | Laminin subunit alpha-5                                     | 7   | 0  | 0  | 3  | 0  | 0  | 3  | 0  | 0 | 1  |
| O60437 | PPL       | Periplakin                                                  | 6   | 0  | 5  | 0  | 0  | 1  | 0  | 0  | 0 | 0  |
| P04271 | S100B     | Protein S100-B                                              | 131 | 43 | 11 | 12 | 20 | 6  | 7  | 20 | 6 | 6  |
| POC870 | JMJ7      | JmjC domain-containing protein 7                            | 50  | 7  | 12 | 0  | 3  | 12 | 5  | 3  | 7 | 1  |
| P61163 | ACTR1A    | Alpha-centractin                                            | 43  | 6  | 17 | 0  | 2  | 5  | 2  | 2  | 9 | 0  |
| P62826 | RAN       | GTP-binding nuclear protein Ran                             | 40  | 8  | 8  | 10 | 3  | 2  | 3  | 2  | 1 | 3  |
| P23528 | CFL1      | Cofilin-1                                                   | 36  | 4  | 18 | 1  | 0  | 3  | 3  | 1  | 6 | 0  |
| P61626 | LYZ       | Lysozyme C                                                  | 26  | 0  | 3  | 7  | 0  | 1  | 9  | 0  | 1 | 5  |
| P61160 | ACTR2     | Actin-related protein 2                                     | 21  | 3  | 12 | 0  | 1  | 2  | 0  | 0  | 3 | 0  |
| Q9Y2S2 | CRYL1     | Lambda-crystallin homolog                                   | 18  | 3  | 9  | 1  | 0  | 0  | 0  | 1  | 2 | 2  |
| O76054 | SEC14L2   | SEC14-like protein 2                                        | 18  | 0  | 11 | 0  | 1  | 2  | 2  | 0  | 1 | 1  |
| O60814 | HIST1H2BK | Histone H2B type 1-K                                        | 15  | 0  | 0  | 9  | 0  | 0  | 5  | 0  | 0 | 1  |
| P37837 | TALDO1    | Transaldolase                                               | 12  | 4  | 0  | 0  | 3  | 1  | 2  | 1  | 1 | 0  |
| P22234 | PAICS     | Multifunctional protein ADE2                                | 12  | 0  | 3  | 0  | 1  | 2  | 3  | 1  | 1 | 1  |
| O75083 | WDR1      | WD repeat-containing protein 1                              | 11  | 3  | 6  | 0  | 0  | 1  | 0  | 0  | 1 | 0  |
| O76024 | WFS1      | Wolframin                                                   | 11  | 0  | 0  | 4  | 0  | 0  | 6  | 0  | 0 | 1  |
| P78310 | CXADR     | Coxsackievirus and adenovirus receptor                      | 10  | 0  | 0  | 8  | 0  | 0  | 2  | 0  | 0 | 0  |
| P04083 | ANXA1     | Annexin A1                                                  | 9   | 1  | 4  | 2  | 1  | 0  | 0  | 1  | 0 | 0  |
| Q9BT78 | COPS4     | COP9 signalosome complex subunit 4                          | 7   | 1  | 6  | 0  | 0  | 0  | 0  | 0  | 0 | 0  |
| P62873 | GNB1      | Guanine nucleotide-binding protein G(I)/G(S)/G(T) subunit t | 7   | 0  | 5  | 1  | 0  | 0  | 0  | 0  | 1 | 0  |
| Q8NHU6 | TDRD7     | Tudor domain-containing protein 7                           | 6   | 0  | 3  | 1  | 0  | 0  | 0  | 0  | 2 | 0  |
| POCG47 | UBB       | Polyubiquitin-B                                             | 51  | 14 | 2  | 1  | 8  | 3  | 5  | 10 | 1 | 7  |
| P14174 | MIF       | Macrophage migration inhibitory factor                      | 43  | 10 | 7  | 4  | 8  | 3  | 3  | 6  | 2 | 0  |
| P60981 | DSTN      | Dextrin                                                     | 37  | 1  | 13 | 0  | 2  | 7  | 7  | 1  | 6 | 0  |
| B3SHH9 | TMEM114   | Transmembrane protein 114                                   | 32  | 0  | 1  | 22 | 0  | 0  | 6  | 0  | 0 | 3  |
| P49327 | FASN      | Fatty acid synthase                                         | 28  | 2  | 6  | 0  | 4  | 5  | 4  | 2  | 4 | 1  |
| P12814 | ACTN1     | Alpha-actinin-1                                             | 27  | 1  | 4  | 3  | 3  | 1  | 5  | 4  | 3 | 3  |
| P09417 | QDPR      | Dihydropteridine reductase                                  | 24  | 8  | 2  | 0  | 1  | 2  | 2  | 3  | 5 | 1  |
| P04908 | HIST1H2AB | Histone H2A type 1-B/E                                      | 21  | 0  | 0  | 9  | 0  | 0  | 6  | 3  | 2 | 1  |
| P12955 | PEPD      | Xaa-Pro dipeptidase                                         | 17  | 5  | 0  | 0  | 4  | 0  | 0  | 7  | 0 | 1  |
| P04216 | THY1      | Thy-1 membrane glycoprotein                                 | 14  | 0  | 0  | 5  | 0  | 0  | 2  | 0  | 2 | 5  |
| Q15257 | PPP2R4    | Serine/threonine-protein phosphatase 2A activator           | 12  | 2  | 1  | 3  | 0  | 1  | 2  | 0  | 1 | 2  |
| O75131 | CPNE3     | Copine-3                                                    | 11  | 0  | 4  | 1  | 1  | 0  | 4  | 1  | 0 | 0  |
| P14324 | FDPS      | Farnesyl pyrophosphate synthase                             | 10  | 1  | 5  | 1  | 0  | 0  | 2  | 0  | 1 | 0  |

|        |         |                                                               |    |   |    |    |   |    |    |   |    |   |
|--------|---------|---------------------------------------------------------------|----|---|----|----|---|----|----|---|----|---|
| Q9NV96 | TMEM30A | Cell cycle control protein 50A                                | 10 | 0 | 0  | 8  | 0 | 0  | 2  | 0 | 0  | 0 |
| Q8IW45 | NAXD    | ATP-dependent (S)-NAD(P)H-hydrate dehydratase                 | 9  | 2 | 1  | 0  | 2 | 1  | 1  | 2 | 0  | 0 |
| P02786 | TFRC    | Transferrin receptor protein 1                                | 9  | 0 | 0  | 9  | 0 | 0  | 0  | 0 | 0  | 0 |
| P01857 | IGHG1   | Ig gamma-1 chain C region                                     | 7  | 0 | 1  | 2  | 0 | 0  | 1  | 0 | 0  | 3 |
| P36871 | PGM1    | Phosphoglucomutase-1                                          | 7  | 1 | 3  | 0  | 1 | 0  | 1  | 0 | 1  | 0 |
| Q92542 | NCSTN   | Nicastrin                                                     | 7  | 0 | 0  | 0  | 0 | 0  | 4  | 0 | 0  | 3 |
| Q02790 | FKBP4   | Peptidyl-prolyl cis-trans isomerase FKBP4                     | 7  | 0 | 3  | 0  | 0 | 3  | 0  | 0 | 1  | 0 |
| Q92597 | NDRG1   | Protein NDRG1                                                 | 7  | 2 | 5  | 0  | 0 | 0  | 0  | 0 | 0  | 0 |
| P12268 | IMPDH2  | Inosine-5'-monophosphate dehydrogenase 2                      | 6  | 2 | 0  | 0  | 2 | 1  | 0  | 1 | 0  | 0 |
| P06753 | TPM3    | Isoform 6 of Tropomyosin alpha-3 chain                        | 5  | 1 | 0  | 0  | 2 | 0  | 0  | 2 | 0  | 0 |
| Q99536 | VAT1    | Synaptic vesicle membrane protein VAT-1 homolog               | 5  | 0 | 1  | 1  | 0 | 0  | 1  | 0 | 0  | 2 |
| P55268 | LAMB2   | Laminin subunit beta-2                                        | 5  | 0 | 0  | 2  | 0 | 0  | 3  | 0 | 0  | 0 |
| Q14203 | DCTN1   | Dynactin subunit 1                                            | 4  | 0 | 4  | 0  | 0 | 0  | 0  | 0 | 0  | 0 |
| Q9POJ0 | NDUFA13 | NADH dehydrogenase [ubiquinone] 1 alpha subcomplex sub        | 66 | 6 | 11 | 0  | 3 | 15 | 13 | 2 | 11 | 5 |
| P61457 | PCBD1   | Pterin-4-alpha-carbinolamine dehydratase                      | 38 | 6 | 2  | 1  | 8 | 5  | 2  | 9 | 5  | 0 |
| Q99832 | CCT7    | T-complex protein 1 subunit eta                               | 18 | 0 | 10 | 0  | 1 | 2  | 0  | 0 | 5  | 0 |
| Q86Y23 | HRNR    | Hornerin                                                      | 15 | 0 | 0  | 4  | 1 | 1  | 2  | 1 | 1  | 5 |
| P36405 | ARL3    | ADP-ribosylation factor-like protein 3                        | 14 | 4 | 4  | 6  | 0 | 0  | 0  | 0 | 0  | 0 |
| Q9BWD1 | ACAT2   | Acetyl-CoA acetyltransferase, cytosolic                       | 14 | 6 | 0  | 0  | 2 | 0  | 0  | 6 | 0  | 0 |
| P13987 | CD59    | CD59 glycoprotein                                             | 13 | 0 | 0  | 10 | 0 | 0  | 3  | 0 | 0  | 0 |
| P21695 | GPD1    | Glycerol-3-phosphate dehydrogenase [NAD(+)], cytoplasmic      | 11 | 2 | 4  | 0  | 0 | 1  | 1  | 1 | 2  | 0 |
| Q9UI40 | SLC24A2 | Isoform 2 of Sodium/potassium/calcium exchanger 2             | 11 | 0 | 0  | 7  | 0 | 0  | 4  | 0 | 0  | 0 |
| Q16775 | HAGH    | Hydroxyacylglutathione hydrolase, mitochondrial               | 10 | 7 | 0  | 0  | 1 | 0  | 0  | 1 | 1  | 0 |
| P48029 | SLC6A8  | Sodium- and chloride-dependent creatine transporter 1         | 10 | 0 | 0  | 6  | 0 | 0  | 2  | 0 | 0  | 2 |
| P61106 | RAB14   | Ras-related protein Rab-14                                    | 9  | 0 | 0  | 8  | 0 | 0  | 0  | 0 | 0  | 1 |
| O95336 | PGLS    | 6-phosphogluconolactonase                                     | 9  | 1 | 0  | 1  | 0 | 0  | 2  | 0 | 0  | 5 |
| P29218 | IMPA1   | Inositol monophosphatase 1                                    | 8  | 4 | 4  | 0  | 0 | 0  | 0  | 0 | 0  | 0 |
| P10599 | TXN     | Thioredoxin                                                   | 8  | 3 | 0  | 0  | 1 | 0  | 0  | 4 | 0  | 0 |
| O75695 | RP2     | Protein XRP2                                                  | 8  | 0 | 0  | 7  | 0 | 0  | 1  | 0 | 0  | 0 |
| Q9BWS9 | CHID1   | Chitinase domain-containing protein 1                         | 8  | 0 | 0  | 1  | 0 | 0  | 3  | 0 | 0  | 4 |
| P30153 | PPP2R1A | Serine/threonine-protein phosphatase 2A 65 kDa regulatory     | 7  | 3 | 2  | 2  | 0 | 0  | 0  | 0 | 0  | 0 |
| Q16555 | DPYSL2  | Dihydropyrimidinase-related protein 2                         | 7  | 1 | 5  | 0  | 0 | 0  | 0  | 0 | 1  | 0 |
| O75874 | IDH1    | Isocitrate dehydrogenase [NADP] cytoplasmic                   | 7  | 1 | 3  | 0  | 0 | 0  | 1  | 0 | 2  | 0 |
| Q96NU7 | AMDHD1  | Probable imidazolonepropionase                                | 6  | 1 | 4  | 0  | 0 | 0  | 0  | 0 | 1  | 0 |
| P02794 | FTH1    | Ferritin heavy chain                                          | 6  | 1 | 0  | 0  | 0 | 0  | 0  | 5 | 0  | 0 |
| Q96IU4 | ABHD14B | Protein ABHD14B                                               | 6  | 4 | 0  | 0  | 2 | 0  | 0  | 0 | 0  | 0 |
| Q99733 | NAP1L4  | Nucleosome assembly protein 1-like 4                          | 6  | 3 | 0  | 2  | 0 | 0  | 0  | 1 | 0  | 0 |
| P31939 | ATIC    | Bifunctional purine biosynthesis protein PURH                 | 5  | 0 | 5  | 0  | 0 | 0  | 0  | 0 | 0  | 0 |
| P55011 | SLC12A2 | Solute carrier family 12 member 2                             | 5  | 0 | 0  | 4  | 0 | 0  | 0  | 0 | 0  | 1 |
| O75663 | TIPRL   | TIP41-like protein                                            | 5  | 1 | 3  | 0  | 0 | 0  | 0  | 0 | 1  | 0 |
| P21399 | ACO1    | Cytoplasmic aconitate hydratase                               | 5  | 1 | 2  | 0  | 0 | 1  | 0  | 0 | 1  | 0 |
| P43007 | SLC1A4  | Neutral amino acid transporter A                              | 4  | 0 | 0  | 3  | 0 | 0  | 1  | 0 | 0  | 0 |
| P05198 | EIF2S1  | Eukaryotic translation initiation factor 2 subunit 1          | 4  | 0 | 3  | 0  | 0 | 0  | 0  | 0 | 1  | 0 |
| P78324 | SIRPA   | Tyrosine-protein phosphatase non-receptor type substrate :    | 3  | 0 | 0  | 3  | 0 | 0  | 0  | 0 | 0  | 0 |
| P49189 | ALDH9A1 | 4-trimethylaminobutyraldehyde dehydrogenase                   | 3  | 2 | 1  | 0  | 0 | 0  | 0  | 0 | 0  | 0 |
| P27824 | CANX    | Calnexin                                                      | 3  | 0 | 0  | 3  | 0 | 0  | 0  | 0 | 0  | 0 |
| Q92530 | PSMF1   | Proteasome inhibitor PI31 subunit                             | 3  | 0 | 3  | 0  | 0 | 0  | 0  | 0 | 0  | 0 |
| Q8TD20 | SLC2A12 | Solute carrier family 2, facilitated glucose transporter memt | 3  | 0 | 0  | 2  | 0 | 0  | 1  | 0 | 0  | 0 |
| Q04760 | GLO1    | Lactoylglutathione lyase                                      | 3  | 3 | 0  | 0  | 0 | 0  | 0  | 0 | 0  | 0 |
| P31948 | STIP1   | Stress-induced-phosphoprotein 1                               | 3  | 3 | 0  | 0  | 0 | 0  | 0  | 0 | 0  | 0 |
| Q14653 | IRF3    | Isoform 4 of Interferon regulatory factor 3                   | 24 | 2 | 13 | 0  | 0 | 1  | 0  | 1 | 6  | 1 |
| Q9HD40 | SEPSECS | O-phosphoseryl-tRNA(Sec) selenium transferase                 | 24 | 6 | 3  | 0  | 0 | 2  | 3  | 5 | 4  | 1 |
| Q9Y5L5 | LENEP   | Lens epithelial cell protein LEP503                           | 17 | 0 | 0  | 6  | 0 | 0  | 5  | 0 | 0  | 6 |
| O60888 | CUTA    | Protein CutA                                                  | 16 | 4 | 1  | 0  | 5 | 1  | 2  | 1 | 1  | 1 |

|        |          |                                                           |    |   |   |   |   |   |   |   |   |   |
|--------|----------|-----------------------------------------------------------|----|---|---|---|---|---|---|---|---|---|
| Q96C23 | GALM     | Aldose 1-epimerase                                        | 15 | 2 | 7 | 0 | 0 | 3 | 1 | 0 | 2 | 0 |
| Q08357 | SLC20A2  | Sodium-dependent phosphate transporter 2                  | 15 | 0 | 0 | 2 | 0 | 0 | 7 | 0 | 0 | 6 |
| Q13200 | PSMD2    | 26S proteasome non-ATPase regulatory subunit 2            | 15 | 2 | 5 | 0 | 0 | 4 | 0 | 0 | 4 | 0 |
| Q2TAA2 | IAH1     | Isoamyl acetate-hydrolyzing esterase 1 homolog            | 14 | 5 | 0 | 0 | 6 | 0 | 0 | 3 | 0 | 0 |
| J3KNQ3 | PSMD13   | 26S proteasome non-ATPase regulatory subunit 13           | 14 | 1 | 3 | 0 | 0 | 3 | 4 | 0 | 3 | 0 |
| Q9HC10 | OTOF     | Otoferlin                                                 | 14 | 1 | 0 | 6 | 0 | 1 | 2 | 2 | 2 | 0 |
| P61088 | UBE2N    | Ubiquitin-conjugating enzyme E2 N                         | 13 | 4 | 4 | 1 | 1 | 0 | 0 | 2 | 0 | 1 |
| O00268 | TAF4     | Transcription initiation factor TFIID subunit 4           | 12 | 4 | 2 | 1 | 2 | 0 | 0 | 2 | 1 | 0 |
| Q9Y2V2 | CARHSP1  | Calcium-regulated heat-stable protein 1                   | 11 | 5 | 1 | 0 | 2 | 0 | 0 | 3 | 0 | 0 |
| P28074 | PSMB5    | Proteasome subunit beta type-5                            | 11 | 2 | 2 | 0 | 1 | 1 | 1 | 0 | 4 | 0 |
| Q6GMV2 | SMYD5    | SET and MYND domain-containing protein 5                  | 10 | 0 | 2 | 1 | 1 | 0 | 3 | 1 | 2 | 0 |
| P00450 | CP       | Ceruloplasmin                                             | 9  | 0 | 2 | 0 | 0 | 0 | 4 | 0 | 0 | 3 |
| P15260 | IFNGR1   | Interferon gamma receptor 1                               | 9  | 0 | 0 | 6 | 0 | 0 | 1 | 0 | 0 | 2 |
| Q9NZH0 | GPRC5B   | G-protein coupled receptor family C group 5 member B      | 7  | 0 | 0 | 4 | 0 | 0 | 3 | 0 | 0 | 0 |
| Q04446 | GBE1     | 1,4-alpha-glucan-branching enzyme                         | 7  | 0 | 4 | 0 | 0 | 1 | 1 | 0 | 1 | 0 |
| P11766 | ADH5     | Alcohol dehydrogenase class-3                             | 7  | 2 | 4 | 0 | 0 | 0 | 0 | 0 | 1 | 0 |
| P26447 | S100A4   | Protein S100-A4                                           | 7  | 2 | 0 | 1 | 1 | 0 | 0 | 2 | 1 | 0 |
| P21926 | CD9      | CD9 antigen                                               | 6  | 0 | 0 | 5 | 0 | 0 | 1 | 0 | 0 | 0 |
| Q9UJ70 | NAGK     | N-acetyl-D-glucosamine kinase                             | 6  | 3 | 0 | 0 | 0 | 0 | 0 | 0 | 2 | 1 |
| Q8IZ83 | ALDH16A1 | Aldehyde dehydrogenase family 16 member A1                | 6  | 0 | 0 | 0 | 0 | 0 | 4 | 0 | 1 | 1 |
| Q08722 | CD47     | Leukocyte surface antigen CD47                            | 6  | 0 | 0 | 6 | 0 | 0 | 0 | 0 | 0 | 0 |
| O43242 | PSMD3    | 26S proteasome non-ATPase regulatory subunit 3            | 6  | 0 | 2 | 0 | 0 | 0 | 2 | 0 | 1 | 1 |
| P27361 | MAPK3    | Mitogen-activated protein kinase 3                        | 6  | 0 | 3 | 0 | 0 | 1 | 1 | 0 | 1 | 0 |
| Q12873 | CHD3     | Isoform 3 of Chromodomain-helicase-DNA-binding protein :  | 6  | 4 | 0 | 2 | 0 | 0 | 0 | 0 | 0 | 0 |
| Q99685 | MGLL     | Monoglyceride lipase                                      | 5  | 0 | 2 | 0 | 0 | 0 | 1 | 0 | 0 | 2 |
| A0A075 | PDE4DIP  | Myomegalin                                                | 5  | 0 | 0 | 0 | 4 | 1 | 0 | 0 | 0 | 0 |
| Q01955 | COL4A3   | Collagen alpha-3(IV) chain                                | 5  | 0 | 0 | 1 | 0 | 0 | 2 | 0 | 0 | 2 |
| Q13057 | COASY    | Bifunctional coenzyme A synthase                          | 5  | 0 | 1 | 0 | 0 | 0 | 0 | 1 | 2 | 1 |
| A6NKB5 | PCNX2    | Pecanex-like protein 2                                    | 4  | 0 | 0 | 0 | 0 | 3 | 1 | 0 | 0 | 0 |
| P37802 | TAGLN2   | Transgelin-2                                              | 4  | 1 | 0 | 1 | 1 | 0 | 0 | 1 | 0 | 0 |
| Q07283 | TCHH     | Trichohyalin                                              | 4  | 0 | 0 | 3 | 0 | 0 | 1 | 0 | 0 | 0 |
| P21359 | NF1      | Neurofibromin                                             | 4  | 0 | 0 | 0 | 0 | 4 | 0 | 0 | 0 | 0 |
| P17612 | PRKACA   | cAMP-dependent protein kinase catalytic subunit alpha     | 4  | 1 | 2 | 0 | 0 | 0 | 0 | 0 | 1 | 0 |
| P54709 | ATP1B3   | Sodium/potassium-transporting ATPase subunit beta-3       | 4  | 0 | 0 | 2 | 0 | 0 | 1 | 0 | 0 | 1 |
| Q86Y39 | NDUFA11  | NADH dehydrogenase [ubiquinone] 1 alpha subcomplex sub    | 4  | 2 | 0 | 0 | 0 | 0 | 0 | 0 | 2 | 0 |
| P09211 | GSTP1    | Glutathione S-transferase P                               | 4  | 2 | 0 | 0 | 1 | 0 | 0 | 1 | 0 | 0 |
| Q969T9 | WBP2     | WW domain-binding protein 2                               | 4  | 0 | 3 | 0 | 0 | 0 | 0 | 0 | 0 | 1 |
| P10114 | RAP2A    | Ras-related protein Rap-2a                                | 3  | 0 | 0 | 0 | 0 | 0 | 1 | 0 | 0 | 2 |
| Q12765 | SCRN1    | Secernin-1                                                | 3  | 2 | 0 | 0 | 0 | 0 | 0 | 1 | 0 | 0 |
| Q8IVW8 | SPNS2    | Protein spinster homolog 2                                | 3  | 0 | 0 | 1 | 0 | 0 | 2 | 0 | 0 | 0 |
| Q9H857 | NT5DC2   | 5'-nucleotidase domain-containing protein 2               | 3  | 0 | 0 | 0 | 0 | 2 | 0 | 0 | 0 | 1 |
| O00519 | FAAH     | Fatty-acid amide hydrolase 1                              | 3  | 0 | 0 | 2 | 0 | 0 | 1 | 0 | 0 | 0 |
| O95834 | EML2     | Echinoderm microtubule-associated protein-like 2          | 3  | 0 | 2 | 0 | 0 | 0 | 0 | 0 | 1 | 0 |
| P29317 | EPHA2    | Ephrin type-A receptor 2                                  | 3  | 0 | 0 | 2 | 0 | 0 | 1 | 0 | 0 | 0 |
| P55072 | VCP      | Transitional endoplasmic reticulum ATPase                 | 3  | 0 | 3 | 0 | 0 | 0 | 0 | 0 | 0 | 0 |
| P41222 | PTGDS    | Prostaglandin-H2 D-isomerase                              | 3  | 0 | 1 | 2 | 0 | 0 | 0 | 0 | 0 | 0 |
| P28070 | PSMB4    | Proteasome subunit beta type-4                            | 3  | 2 | 0 | 0 | 0 | 1 | 0 | 0 | 0 | 0 |
| P10644 | PRKAR1A  | cAMP-dependent protein kinase type I-alpha regulatory sub | 3  | 0 | 2 | 0 | 0 | 0 | 0 | 1 | 0 | 0 |
| P27816 | MAP4     | Microtubule-associated protein 4                          | 2  | 0 | 0 | 2 | 0 | 0 | 0 | 0 | 0 | 0 |
| Q14767 | LTBP2    | Latent-transforming growth factor beta-binding protein 2  | 2  | 0 | 0 | 2 | 0 | 0 | 0 | 0 | 0 | 0 |
| Q86XX4 | FRAS1    | Extracellular matrix protein FRAS1                        | 2  | 0 | 0 | 0 | 0 | 0 | 0 | 0 | 0 | 2 |
| P37235 | HPCAL1   | Hippocalcin-like protein 1                                | 2  | 0 | 0 | 0 | 0 | 0 | 2 | 0 | 0 | 0 |
| P46926 | GNPDA1   | Glucosamine-6-phosphate isomerase 1                       | 2  | 2 | 0 | 0 | 0 | 0 | 0 | 0 | 0 | 0 |
| Q9NQC3 | RTN4     | Reticulon-4                                               | 2  | 0 | 0 | 2 | 0 | 0 | 0 | 0 | 0 | 0 |

|        |        |                                         |   |   |   |   |   |   |   |   |   |   |
|--------|--------|-----------------------------------------|---|---|---|---|---|---|---|---|---|---|
| O00764 | PDXK   | Pyridoxal kinase                        | 2 | 0 | 2 | 0 | 0 | 0 | 0 | 0 | 0 | 0 |
| O60884 | DNAJA2 | Dnaj homolog subfamily A member 2       | 2 | 0 | 2 | 0 | 0 | 0 | 0 | 0 | 0 | 0 |
| Q7Z460 | CLASP1 | CLIP-associating protein 1              | 2 | 0 | 0 | 0 | 0 | 0 | 0 | 0 | 0 | 2 |
| P55060 | CSE1L  | Exportin-2                              | 2 | 0 | 0 | 0 | 0 | 0 | 2 | 0 | 0 | 0 |
| P18206 | VCL    | Vinculin                                | 2 | 0 | 2 | 0 | 0 | 0 | 0 | 0 | 0 | 0 |
| Q9NZU5 | LMCD1  | LIM and cysteine-rich domains protein 1 | 2 | 0 | 2 | 0 | 0 | 0 | 0 | 0 | 0 | 0 |

Proteins identified in MudPIT analysis

| Accession Number | Gene Name     | Proteins                                                          | Coverage | Total Spectral Count | Spectral Count_37yo | Spectral Count_58yo |
|------------------|---------------|-------------------------------------------------------------------|----------|----------------------|---------------------|---------------------|
| Q01082           | SPTBN1        | Spectrin beta chain, non-erythrocytic 1                           | 69       | 1125                 | 378                 | 747                 |
| Q15020           | SPTBN2        | Spectrin beta chain, non-erythrocytic 2                           | 20       | 159                  | 68                  | 91                  |
| P11277           | SPTB          | Spectrin beta chain, erythrocytic                                 | 12       | 47                   | 32                  | 15                  |
| Q13813           | SPTAN1        | Spectrin alpha chain, non-erythrocytic 1                          | 65       | 1032                 | 319                 | 713                 |
| Q15149           | PLEC          | Plectin                                                           | 37       | 465                  | 169                 | 296                 |
| A0A024           | HSPG2         | Heparan sulfate proteoglycan 2 (Perlecan), isoform CRA_b          | 40       | 767                  | 585                 | 182                 |
| P11171           | EPB41         | Protein 4.1                                                       | 39       | 354                  | 234                 | 120                 |
| Q43491           | EPB41L2       | Band 4.1-like protein 2                                           | 38       | 217                  | 141                 | 76                  |
| Q9H4G0           | EPB41L1       | Isoform 2 of Band 4.1-like protein 1                              | 29       | 80                   | 53                  | 27                  |
| Q9Y2J2           | EPB41L3       | Band 4.1-like protein 3                                           | 18       | 67                   | 50                  | 17                  |
| Q8WZ42           | TTN           | Titin                                                             | 0        | 4                    | 4                   | 0                   |
| Q9BXM0           | PRX           | Periaxin                                                          | 48       | 594                  | 313                 | 281                 |
| P35241           | RDX           | Radixin                                                           | 58       | 353                  | 143                 | 210                 |
| P26038           | MSN           | Moesin                                                            | 50       | 310                  | 127                 | 183                 |
| P21333           | FLNA          | Filamin-A                                                         | 31       | 238                  | 95                  | 143                 |
| Q13515           | BFSP2         | Phakinin                                                          | 84       | 1524                 | 640                 | 884                 |
| Q12934           | BFSP1         | Filesin                                                           | 69       | 2498                 | 1158                | 1340                |
| P35555           | FBN1          | Fibrillin-1                                                       | 22       | 228                  | 214                 | 14                  |
| I6L894           | ANK2          | Ankyrin-2                                                         | 17       | 188                  | 117                 | 71                  |
| Q12955           | ANK3          | Ankyrin-3                                                         | 4        | 41                   | 24                  | 17                  |
| P05023           | ATP1A1        | Sodium/potassium-transporting ATPase subunit alpha-1              | 42       | 400                  | 105                 | 295                 |
| B723V1           |               | Sodium/potassium-transporting ATPase subunit alpha (Fragment)     | 41       | 379                  | 103                 | 276                 |
| B3KW93           |               | Sodium/potassium-transporting ATPase subunit alpha                | 19       | 226                  | 41                  | 185                 |
| Q14204           | DYNC1H1       | Cytoplasmic dynein 1 heavy chain 1                                | 14       | 185                  | 72                  | 113                 |
| P60709           | ACTB          | Actin, cytoplasmic 1                                              | 60       | 815                  | 483                 | 332                 |
| Q53G99           |               | Beta actin variant (Fragment)                                     | 60       | 813                  | 481                 | 332                 |
| V9HVZ7           | HEL-176       | Epididymis luminal protein 176                                    | 64       | 556                  | 290                 | 266                 |
| P68032           | ACTC1         | Actin, alpha cardiac muscle 1                                     | 54       | 237                  | 87                  | 150                 |
| Q562R1           | ACTBL2        | Beta-actin-like protein 2                                         | 17       | 106                  | 26                  | 80                  |
| P0CG38           | POTE1         | POTE ankyrin domain family member I                               | 7        | 79                   | 16                  | 63                  |
| P62258           | YWHAE         | 14-3-3 protein epsilon                                            | 51       | 248                  | 100                 | 148                 |
| P63104           | YWHAZ         | 14-3-3 protein zeta/delta                                         | 60       | 123                  | 55                  | 68                  |
| P61981           | YWHAG         | 14-3-3 protein gamma                                              | 51       | 61                   | 24                  | 37                  |
| Q04917           | YWHAH         | 14-3-3 protein eta                                                | 24       | 39                   | 11                  | 28                  |
| P07315           | CRYGC         | Gamma-crystallin C                                                | 90       | 1289                 | 1047                | 242                 |
| P07316           | CRYGB         | Gamma-crystallin B                                                | 74       | 332                  | 119                 | 213                 |
| P11844           | CRYGA         | Gamma-crystallin A                                                | 48       | 17                   | 14                  | 3                   |
| P22914           | CRYGS         | Beta-crystallin S                                                 | 96       | 2635                 | 1627                | 1008                |
| Q9UFA7           | DKFZp434A0627 | Crystallin, gamma S, isoform CRA_a                                | 97       | 1881                 | 1155                | 726                 |
| P00352           | ALDH1A1       | Retinal dehydrogenase 1                                           | 61       | 1806                 | 657                 | 1149                |
| P47895           | ALDH1A3       | Aldehyde dehydrogenase family 1 member A3                         | 11       | 42                   | 27                  | 15                  |
| P17858           | PFKL          | ATP-dependent 6-phosphofructokinase, liver type                   | 34       | 121                  | 62                  | 59                  |
| Q01813           | PFKP          | ATP-dependent 6-phosphofructokinase, platelet type                | 20       | 47                   | 23                  | 24                  |
| P08237           | PFKM          | ATP-dependent 6-phosphofructokinase, muscle type                  | 13       | 34                   | 13                  | 21                  |
| A0A0H3           | CRYBB2        | Beta-crystallin B2 (Fragment)                                     | 99       | 3620                 | 2603                | 1017                |
| A0A0H3           | CRYBB2        | Beta-crystallin B2                                                | 90       | 3245                 | 2218                | 1027                |
| O75955           | FLOT1         | Flotillin-1                                                       | 74       | 518                  | 129                 | 389                 |
| P06733           | ENO1          | Alpha-enolase                                                     | 70       | 362                  | 146                 | 216                 |
| P09104           | ENO2          | Gamma-enolase                                                     | 53       | 178                  | 112                 | 66                  |
| L0R849           | EDARADD       | Alternative protein EDARADD                                       | 12       | 21                   | 2                   | 19                  |
| P07900           | HSP90AA1      | Heat shock protein HSP 90-alpha                                   | 44       | 106                  | 51                  | 55                  |
| P08238           | HSP90AB1      | Heat shock protein HSP 90-beta                                    | 35       | 74                   | 26                  | 48                  |
| P14625           | HSP90B1       | Endoplasmin                                                       | 8        | 10                   | 5                   | 5                   |
| P14618           | PKM           | Isoform M1 of Pyruvate kinase PKM                                 | 69       | 311                  | 137                 | 174                 |
| P53674           | CRYBB1        | Beta-crystallin B1                                                | 92       | 10243                | 4221                | 6022                |
| P00558           | PGK1          | Phosphoglycerate kinase 1                                         | 77       | 710                  | 225                 | 485                 |
| P07205           | PGK2          | Phosphoglycerate kinase 2                                         | 18       | 126                  | 33                  | 93                  |
| Q9H0U4           | RAB1B         | Ras-related protein Rab-1B                                        | 55       | 223                  | 41                  | 182                 |
| P62820           | RAB1A         | Ras-related protein Rab-1A                                        | 61       | 213                  | 41                  | 110                 |
| P61026           | RAB10         | Ras-related protein Rab-10                                        | 44       | 141                  | 38                  | 103                 |
| Q15286           | RAB35         | Ras-related protein Rab-35                                        | 29       | 70                   | 21                  | 49                  |
| P61006           | RAB8A         | Ras-related protein Rab-8A                                        | 28       | 34                   | 16                  | 18                  |
| P04406           | GAPDH         | Glyceraldehyde-3-phosphate dehydrogenase                          | 88       | 1638                 | 1011                | 627                 |
| Q92823           | NRCAM         | Isoform 3 of Neuronal cell adhesion molecule                      | 41       | 568                  | 161                 | 407                 |
| Q14CA1           | NRCAM         | NRCAM protein                                                     | 41       | 563                  | 156                 | 407                 |
| P04075           | ALDOA         | Fructose-bisphosphate aldolase A                                  | 71       | 241                  | 126                 | 115                 |
| P09972           | ALDOC         | Fructose-bisphosphate aldolase C                                  | 52       | 198                  | 64                  | 134                 |
| Q14254           | FLOT2         | Flotillin-2                                                       | 65       | 355                  | 118                 | 237                 |
| P55268           | LAMB2         | Laminin subunit beta-2                                            | 28       | 136                  | 88                  | 48                  |
| A0A097           | CRYBA1        | Beta crystallin A3 chain transcript CN (Fragment)                 | 91       | 7846                 | 4540                | 3306                |
| A0A0H3           | CRYBA1        | Crystallin beta A3/A1 (Fragment)                                  | 100      | 640                  | 271                 | 369                 |
| Q6UWM7           | LCTL          | Lactase-like protein                                              | 58       | 435                  | 272                 | 163                 |
| O15230           | LAMA5         | Laminin subunit alpha-5                                           | 15       | 167                  | 91                  | 76                  |
| P35222           | CTNNB1        | Catenin beta-1                                                    | 42       | 125                  | 67                  | 58                  |
| P14923           | JUP           | Junction plakoglobin                                              | 19       | 26                   | 24                  | 2                   |
| P50395           | GDI2          | Rab GDP dissociation inhibitor beta                               | 52       | 273                  | 139                 | 134                 |
| P31150           | GDI1          | Rab GDP dissociation inhibitor alpha                              | 51       | 235                  | 140                 | 95                  |
| P08670           | VIM           | Vimentin                                                          | 61       | 161                  | 44                  | 117                 |
| P41219           | PRPH          | Peripherin                                                        | 10       | 19                   | 4                   | 15                  |
| P63092           | GNAS          | Guanine nucleotide-binding protein G(s) subunit alpha isoforms sh | 59       | 104                  | 65                  | 39                  |
| P04899           | GNAI2         | Guanine nucleotide-binding protein G(i) subunit alpha-2           | 36       | 69                   | 38                  | 31                  |
| P08754           | GNAI3         | Guanine nucleotide-binding protein G(k) subunit alpha             | 44       | 52                   | 31                  | 21                  |
| P63096           | GNAI1         | Guanine nucleotide-binding protein G(i) subunit alpha-1           | 20       | 41                   | 28                  | 13                  |
| O75781           | PALM          | Paralemmin-1                                                      | 71       | 80                   | 46                  | 34                  |
| Q8IX56           | PALM2         | Paralemmin-2                                                      | 42       | 62                   | 23                  | 39                  |
| P26232           | CTNNA2        | Isoform 2 of Catenin alpha-2                                      | 44       | 115                  | 62                  | 53                  |

|        |          |                                                                   |    |      |      |      |
|--------|----------|-------------------------------------------------------------------|----|------|------|------|
| P35221 | CTNNA1   | Catenin alpha-1                                                   | 18 | 15   | 11   | 4    |
| O00410 | IPOS     | Importin-5                                                        | 35 | 284  | 78   | 206  |
| P80723 | BASP1    | Brain acid soluble protein 1                                      | 96 | 994  | 431  | 563  |
| P00338 | LDHA     | L-lactate dehydrogenase A chain                                   | 68 | 169  | 101  | 68   |
| P07195 | LDHB     | L-lactate dehydrogenase B chain                                   | 37 | 37   | 12   | 25   |
| P48163 | ME1      | NADP-dependent malic enzyme                                       | 56 | 195  | 107  | 88   |
| P02489 | CRYAA    | Alpha-crystallin A chain                                          | 97 | 6497 | 5324 | 1173 |
| P02511 | CRYAB    | Alpha-crystallin B chain                                          | 85 | 6351 | 3607 | 2744 |
| P08572 | COL4A2   | Collagen alpha-2(IV) chain                                        | 16 | 1049 | 769  | 280  |
| P29401 | TKT      | Transketolase                                                     | 65 | 338  | 121  | 217  |
| P02462 | COL4A1   | Collagen alpha-1(IV) chain                                        | 10 | 1058 | 1054 | 4    |
| P29400 | COL4A5   | Collagen alpha-5(IV) chain                                        | 8  | 114  | 110  | 4    |
| P48637 | GSS      | Glutathione synthetase                                            | 61 | 936  | 192  | 744  |
| P35527 | KRT9     | Keratin, type I cytoskeletal 9                                    | 61 | 219  | 37   | 182  |
| P11216 | PYGB     | Glycogen phosphorylase, brain form                                | 38 | 133  | 50   | 83   |
| P06737 | PYGL     | Glycogen phosphorylase, liver form                                | 9  | 18   | 16   | 2    |
| P20340 | RAB6A    | Isoform 2 of Ras-related protein Rab-6A                           | 71 | 589  | 76   | 513  |
| P20340 | RAB6A    | Ras-related protein Rab-6A                                        | 66 | 541  | 75   | 466  |
| Q9NRW1 | RAB6B    | Ras-related protein Rab-6B                                        | 59 | 370  | 36   | 334  |
| O00192 | ARVCF    | Armadillo repeat protein deleted in velo-cardio-facial syndrome   | 38 | 236  | 141  | 95   |
| Q00610 | CLTC     | Clathrin heavy chain 1                                            | 20 | 81   | 45   | 36   |
| P07320 | CRYGD    | Gamma-crystallin D                                                | 82 | 1802 | 1378 | 424  |
| A0A097 | GJA8     | Gap junction protein (Fragment)                                   | 54 | 504  | 313  | 191  |
| P19022 | CDH2     | Cadherin-2                                                        | 29 | 368  | 105  | 263  |
| P32754 | HPD      | 4-hydroxyphenylpyruvate dioxygenase                               | 65 | 142  | 38   | 104  |
| Q9NTI2 | ATP8A2   | Phospholipid-transporting ATPase IB                               | 24 | 123  | 42   | 81   |
| P50453 | SERPINB9 | Serpin B9                                                         | 47 | 83   | 44   | 39   |
| P30740 | SERPINB1 | Leukocyte elastase inhibitor                                      | 25 | 50   | 28   | 22   |
| P14543 | NID1     | Nidogen-1                                                         | 14 | 32   | 17   | 15   |
| Q14112 | NID2     | Nidogen-2                                                         | 11 | 14   | 10   | 4    |
| P35237 | SERPINB6 | Serpin B6                                                         | 68 | 395  | 125  | 270  |
| P28161 | GSTM2    | Glutathione S-transferase Mu 2                                    | 56 | 46   | 41   | 5    |
| P09488 | GSTM1    | Glutathione S-transferase Mu 1                                    | 47 | 34   | 34   | 0    |
| P21266 | GSTM3    | Glutathione S-transferase Mu 3                                    | 43 | 25   | 15   | 10   |
| P11047 | LAMC1    | Laminin subunit gamma-1                                           | 18 | 54   | 26   | 28   |
| P60953 | CDC42    | Cell division control protein 42 homolog                          | 46 | 243  | 102  | 141  |
| P63000 | RAC1     | Ras-related C3 botulinum toxin substrate 1                        | 43 | 123  | 62   | 61   |
| P84095 | RHOG     | Rho-related GTP-binding protein RhoG                              | 27 | 12   | 10   | 2    |
| P51149 | RAB7A    | Ras-related protein Rab-7a                                        | 75 | 199  | 76   | 123  |
| P52209 | PGD      | 6-phosphogluconate dehydrogenase, decarboxylating                 | 59 | 149  | 103  | 46   |
| Q71U36 | TUBA1A   | Tubulin alpha-1A chain                                            | 43 | 218  | 106  | 112  |
| P68363 | TUBA1B   | Tubulin alpha-1B chain                                            | 43 | 209  | 96   | 113  |
| Q14974 | KPNB1    | Importin subunit beta-1                                           | 38 | 119  | 51   | 68   |
| Q72406 | MYH14    | Myosin-14                                                         | 7  | 23   | 5    | 18   |
| P35579 | MYH9     | Myosin-9                                                          | 8  | 17   | 6    | 11   |
| P35580 | MYH10    | Myosin-10                                                         | 4  | 7    | 3    | 4    |
| P16152 | CBR1     | Carbonyl reductase [NADPH] 1                                      | 78 | 703  | 148  | 555  |
| Q00796 | SORD     | Sorbitol dehydrogenase                                            | 64 | 505  | 166  | 339  |
| P13591 | NCAM1    | Isoform 2 of Neural cell adhesion molecule 1                      | 28 | 152  | 54   | 98   |
| H7BYX6 | NCAM1    | Neural cell adhesion molecule 1                                   | 32 | 124  | 59   | 65   |
| O94856 | NFASC    | Isoform 12 of Neurofascin                                         | 25 | 131  | 51   | 80   |
| P55786 | NPEPPS   | Puromycin-sensitive aminopeptidase                                | 30 | 89   | 30   | 59   |
| P32119 | PRDX2    | Peroxiredoxin-2                                                   | 59 | 56   | 13   | 43   |
| Q06830 | PRDX1    | Peroxiredoxin-1                                                   | 26 | 19   | 6    | 13   |
| Q13162 | PRDX4    | Peroxiredoxin-4                                                   | 47 | 18   | 14   | 4    |
| Q99497 | PARK7    | Protein deglycase DJ-1                                            | 83 | 239  | 194  | 45   |
| P09936 | UCHL1    | Ubiquitin carboxyl-terminal hydrolase isozyme L1                  | 74 | 197  | 124  | 73   |
| P36969 | GPX4     | Phospholipid hydroperoxide glutathione peroxidase, mitochondrial  | 60 | 192  | 56   | 136  |
| P00390 | GSR      | Glutathione reductase, mitochondrial                              | 50 | 87   | 45   | 42   |
| P49327 | FASN     | Fatty acid synthase                                               | 10 | 46   | 28   | 18   |
| P18206 | VCL      | Vinculin                                                          | 20 | 42   | 8    | 34   |
| O75923 | DYSF     | Dysferlin                                                         | 15 | 34   | 26   | 8    |
| A0A1B1 | CRYBA4   | Beta crystallin A4 chain (Fragment)                               | 89 | 3781 | 3283 | 498  |
| Q8N3J6 | CADM2    | Cell adhesion molecule 2                                          | 59 | 384  | 177  | 207  |
| P61020 | RAB5B    | Ras-related protein Rab-5B                                        | 53 | 176  | 31   | 145  |
| P51148 | RAB5C    | Ras-related protein Rab-5C                                        | 28 | 40   | 11   | 29   |
| P20339 | RAB5A    | Ras-related protein Rab-5A                                        | 53 | 37   | 12   | 25   |
| P26998 | CRYBB3   | Beta-crystallin B3                                                | 83 | 209  | 112  | 97   |
| P48643 | CCT5     | T-complex protein 1 subunit epsilon                               | 22 | 82   | 27   | 55   |
| P50991 | CCT4     | T-complex protein 1 subunit delta                                 | 19 | 35   | 17   | 18   |
| P23141 | CES1     | Liver carboxylesterase 1                                          | 44 | 86   | 47   | 39   |
| P61586 | RHOA     | Transforming protein RhoA                                         | 79 | 315  | 165  | 150  |
| Q579C9 | PIP5KL1  | Phosphatidylinositol 4-phosphate 5-kinase-like protein 1          | 49 | 177  | 87   | 90   |
| Q53FA7 | TP53I3   | Quinone oxidoreductase PIG3                                       | 61 | 160  | 63   | 97   |
| O94760 | DDAH1    | N(G),N(G)-dimethylarginine dimethylaminohydrolase 1               | 71 | 99   | 52   | 47   |
| P23526 | AHCY     | Adenosylhomocysteinase                                            | 43 | 97   | 41   | 56   |
| P21695 | GPD1     | Glycerol-3-phosphate dehydrogenase [NAD(+)], cytoplasmic          | 34 | 51   | 10   | 41   |
| Q8N335 | GPD1L    | Glycerol-3-phosphate dehydrogenase 1-like protein                 | 14 | 31   | 6    | 25   |
| P10114 | RAP2A    | Ras-related protein Rap-2a                                        | 48 | 50   | 7    | 43   |
| P61225 | RAP2B    | Ras-related protein Rap-2b                                        | 56 | 42   | 8    | 34   |
| Q9Y3L5 | RAP2C    | Ras-related protein Rap-2c                                        | 55 | 28   | 5    | 23   |
| P30153 | PPP2R1A  | Serine/threonine-protein phosphatase 2A 65 kDa regulatory subunit | 34 | 61   | 15   | 46   |
| P49368 | CCT3     | T-complex protein 1 subunit gamma                                 | 37 | 54   | 24   | 30   |
| P22748 | CA4      | Carbonic anhydrase 4                                              | 44 | 110  | 60   | 50   |
| K7ENI8 | CA4      | Carbonic anhydrase 4 (Fragment)                                   | 82 | 42   | 25   | 17   |
| Q01469 | FABP5    | Fatty acid-binding protein, epidermal                             | 87 | 76   | 39   | 37   |
| Q9Y6H8 | GJA3     | Gap junction alpha-3 protein                                      | 47 | 310  | 174  | 136  |
| P30041 | PRDX6    | Peroxiredoxin-6                                                   | 54 | 163  | 44   | 119  |
| P34913 | EPHX2    | Bifunctional epoxide hydrolase 2                                  | 45 | 141  | 106  | 35   |



|        |          |                                                                   |    |     |     |     |
|--------|----------|-------------------------------------------------------------------|----|-----|-----|-----|
| P06744 | GPI      | Glucose-6-phosphate isomerase                                     | 39 | 138 | 98  | 40  |
| P22392 | NME2     | Isoform 3 of Nucleoside diphosphate kinase B                      | 48 | 102 | 52  | 50  |
| P15531 | NME1     | Nucleoside diphosphate kinase A                                   | 69 | 51  | 24  | 27  |
| Q96ZM7 | TINAGL1  | Tubulointerstitial nephritis antigen-like                         | 52 | 104 | 75  | 29  |
| O15498 | YKT6     | Synaptobrevin homolog YKT6                                        | 79 | 90  | 29  | 61  |
| Q9NQ79 | CRTAC1   | Cartilage acidic protein 1                                        | 31 | 73  | 45  | 28  |
| Q14240 | EIF4A2   | Eukaryotic initiation factor 4A-II                                | 33 | 63  | 24  | 39  |
| P60842 | EIF4A1   | Eukaryotic initiation factor 4A-I                                 | 31 | 58  | 23  | 35  |
| P13798 | APEH     | Acylamino-acid-releasing enzyme                                   | 33 | 68  | 18  | 50  |
| P78371 | CCT2     | T-complex protein 1 subunit beta                                  | 41 | 57  | 38  | 19  |
| P12814 | ACTN1    | Alpha-actinin-1                                                   | 24 | 47  | 14  | 33  |
| P18669 | PGAM1    | Phosphoglycerate mutase 1                                         | 69 | 143 | 70  | 73  |
| P11233 | RALA     | Ras-related protein Ral-A                                         | 43 | 111 | 35  | 76  |
| P11234 | RALB     | Ras-related protein Ral-B                                         | 49 | 59  | 31  | 28  |
| P00387 | CYB5R3   | NADH-cytochrome b5 reductase 3                                    | 51 | 105 | 56  | 49  |
| A2RU48 | SMCO3    | Single-pass membrane and coiled-coil domain-containing protein 3  | 73 | 88  | 26  | 62  |
| P13639 | EEF2     | Elongation factor 2                                               | 20 | 86  | 39  | 47  |
| P40925 | MDH1     | Malate dehydrogenase, cytoplasmic                                 | 53 | 85  | 34  | 51  |
| P07437 | TUBB     | Tubulin beta chain                                                | 44 | 65  | 28  | 37  |
| P04350 | TUBB4A   | Tubulin beta-4A chain                                             | 36 | 59  | 25  | 34  |
| Q86VP6 | CAND1    | Cullin-associated NEDD8-dissociated protein 1                     | 16 | 67  | 23  | 44  |
| P62937 | PPIA     | Peptidyl-prolyl cis-trans isomerase A                             | 41 | 39  | 19  | 20  |
| P23284 | PPIB     | Peptidyl-prolyl cis-trans isomerase B                             | 35 | 13  | 5   | 8   |
| P29317 | EPHA2    | Ephrin type-A receptor 2                                          | 20 | 39  | 24  | 15  |
| P54753 | EPHB3    | Ephrin type-B receptor 3                                          | 3  | 5   | 2   | 3   |
| Q8N126 | CADM3    | Cell adhesion molecule 3                                          | 51 | 170 | 58  | 112 |
| Q01955 | COL4A3   | Collagen alpha-3(IV) chain                                        | 9  | 123 | 118 | 5   |
| Q8TCT0 | CERK     | Ceramide kinase                                                   | 33 | 120 | 77  | 43  |
| P00450 | CP       | Ceruloplasmin                                                     | 16 | 71  | 26  | 45  |
| Q99832 | CCT7     | T-complex protein 1 subunit eta                                   | 36 | 61  | 28  | 33  |
| Q13449 | LSAMP    | Limbic system-associated membrane protein                         | 43 | 551 | 269 | 282 |
| P11166 | SLC2A1   | Solute carrier family 2, facilitated glucose transporter member 1 | 12 | 280 | 69  | 211 |
| Q9ULX7 | CA14     | Carbonic anhydrase 14                                             | 33 | 216 | 106 | 110 |
| P61204 | ARF3     | ADP-ribosylation factor 3                                         | 65 | 182 | 53  | 129 |
| P18085 | ARF4     | ADP-ribosylation factor 4                                         | 40 | 148 | 29  | 119 |
| P62805 | HIST1H4A | Histone H4                                                        | 58 | 96  | 67  | 29  |
| P22061 | PCMT1    | Protein-L-isoaspartate(D-aspartate) O-methyltransferase           | 63 | 96  | 69  | 27  |
| P78310 | CXADR    | Coxsackievirus and adenovirus receptor                            | 36 | 71  | 43  | 28  |
| P11413 | G6PD     | Glucose-6-phosphate 1-dehydrogenase                               | 26 | 59  | 24  | 35  |
| P17987 | TCP1     | T-complex protein 1 subunit alpha                                 | 30 | 55  | 19  | 36  |
| P01116 | KRAS     | Isoform 2B of GTPase KRas                                         | 73 | 38  | 19  | 19  |
| P01112 | HRAS     | GTPase HRas                                                       | 58 | 25  | 14  | 11  |
| P07355 | ANXA2    | Annexin A2                                                        | 49 | 45  | 17  | 28  |
| P55011 | SLC12A2  | Solute carrier family 12 member 2                                 | 12 | 40  | 19  | 21  |
| Q14764 | MVP      | Major vault protein                                               | 25 | 33  | 15  | 18  |
| O60437 | PPL      | Periplakin                                                        | 10 | 25  | 21  | 4   |
| P09382 | LGALS1   | Galectin-1                                                        | 82 | 289 | 65  | 224 |
| P10909 | CLU      | Clusterin                                                         | 30 | 126 | 27  | 99  |
| P08758 | ANXA5    | Annexin A5                                                        | 36 | 91  | 19  | 72  |
| P61019 | RAB2A    | Ras-related protein Rab-2A                                        | 57 | 79  | 22  | 57  |
| Q5TDP6 | LGSN     | Lengsin                                                           | 27 | 79  | 43  | 36  |
| Q969T9 | WBP2     | WW domain-binding protein 2                                       | 46 | 60  | 20  | 40  |
| Q9NUQ9 | FAM49B   | Protein FAM49B                                                    | 36 | 55  | 21  | 34  |
| O95428 | PAPLN    | Papilin                                                           | 16 | 45  | 36  | 9   |
| P38606 | ATP6V1A  | V-type proton ATPase catalytic subunit A                          | 25 | 36  | 16  | 20  |
| P13489 | RNH1     | Ribonuclease inhibitor                                            | 48 | 34  | 28  | 6   |
| Q58EX2 | SDK2     | Isoform 3 of Protein sidekick-2                                   | 9  | 25  | 14  | 11  |
| Q14019 | COTL1    | Coactosin-like protein                                            | 79 | 102 | 40  | 62  |
| P07738 | BPGM     | Bisphosphoglycerate mutase                                        | 66 | 81  | 41  | 40  |
| P53420 | COL4A4   | Collagen alpha-4(IV) chain                                        | 8  | 77  | 37  | 40  |
| Q15124 | PGM5     | Phosphoglucomutase-like protein 5                                 | 24 | 71  | 21  | 50  |
| P15121 | AKR1B1   | Aldose reductase                                                  | 58 | 65  | 41  | 24  |
| Q08257 | CRYZ     | Quinone oxidoreductase                                            | 49 | 38  | 25  | 13  |
| O76024 | WFS1     | Wolframlin                                                        | 17 | 27  | 9   | 18  |
| E9PCT5 | CAV1     | Caveolin                                                          | 66 | 158 | 99  | 59  |
| Q9BY67 | CADM1    | Cell adhesion molecule 1                                          | 39 | 94  | 56  | 38  |
| P04792 | HSPB1    | Heat shock protein beta-1                                         | 64 | 90  | 57  | 33  |
| P10768 | ESD      | S-formylglutathione hydrolase                                     | 59 | 77  | 32  | 45  |
| P30086 | PEBP1    | Phosphatidylethanolamine-binding protein 1                        | 71 | 73  | 46  | 27  |
| P54920 | NAPA     | Alpha-soluble NSF attachment protein                              | 51 | 58  | 10  | 48  |
| Q93088 | BHMT     | Betaine--homocysteine S-methyltransferase 1                       | 34 | 50  | 24  | 26  |
| Q9UJ70 | NAGK     | N-acetyl-D-glucosamine kinase                                     | 29 | 43  | 17  | 26  |
| P37235 | HPCAL1   | Hippocalcin-like protein 1                                        | 56 | 35  | 4   | 31  |
| P61601 | NCALD    | Neurocalcin-delta                                                 | 30 | 14  | 2   | 12  |
| P60174 | TPI1     | Triosephosphate isomerase                                         | 48 | 35  | 9   | 26  |
| B4DN31 |          | cDNA FLJ55809                                                     | 34 | 34  | 22  | 12  |
| P22314 | UBA1     | Ubiquitin-like modifier-activating enzyme 1                       | 16 | 33  | 7   | 26  |
| O76054 | SEC14L2  | SEC14-like protein 2                                              | 32 | 32  | 15  | 17  |
| Q9BRJ7 | NUDT16L1 | Protein syndesmos                                                 | 62 | 30  | 19  | 11  |
| P07942 | LAMB1    | Laminin subunit beta-1                                            | 10 | 29  | 22  | 7   |
| P11142 | HSPA8    | Heat shock cognate 71 kDa protein                                 | 24 | 26  | 9   | 17  |
| P16930 | FAH      | Fumarylacetoacetase                                               | 26 | 83  | 25  | 58  |
| P61106 | RAB14    | Ras-related protein Rab-14                                        | 54 | 50  | 13  | 37  |
| Q68CY4 | CYB5R2   | NADH-cytochrome b5 reductase 2                                    | 42 | 49  | 23  | 26  |
| O75695 | RP2      | Protein XRP2                                                      | 39 | 39  | 17  | 22  |
| P02649 | APOE     | Apolipoprotein E                                                  | 41 | 37  | 3   | 34  |
| S6B291 |          | IgG H chain                                                       | 27 | 37  | 23  | 14  |
| Q14376 | GALE     | UDP-glucose 4-epimerase                                           | 37 | 33  | 12  | 21  |
| Q9BX67 | JAM3     | Junctional adhesion molecule C                                    | 35 | 31  | 14  | 17  |

|        |           |                                                                  |    |     |    |     |
|--------|-----------|------------------------------------------------------------------|----|-----|----|-----|
| P37802 | TAGLN2    | Transgelin-2                                                     | 58 | 29  | 10 | 19  |
| Q96KP4 | CNDP2     | Cytosolic non-specific dipeptidase                               | 32 | 23  | 7  | 16  |
| Q9BWD1 | ACAT2     | Acetyl-CoA acetyltransferase, cytosolic                          | 42 | 23  | 16 | 7   |
| P37837 | TALDO1    | Transaldolase                                                    | 31 | 18  | 8  | 10  |
| Q15907 | RAB11B    | Ras-related protein Rab-11B                                      | 47 | 258 | 46 | 212 |
| P23527 | HIST1H2BO | Histone H2B type 1-O                                             | 49 | 48  | 32 | 16  |
| Q9Y252 | CRYL1     | Lambda-crystallin homolog                                        | 43 | 48  | 15 | 33  |
| P02792 | FTL       | Ferritin light chain                                             | 51 | 41  | 8  | 33  |
| P09417 | QDPR      | Dihydropteridine reductase                                       | 45 | 37  | 16 | 21  |
| O95336 | PGLS      | 6-phosphogluconolactonase                                        | 62 | 33  | 16 | 17  |
| P40227 | CCT6A     | T-complex protein 1 subunit zeta                                 | 26 | 33  | 9  | 24  |
| P36871 | PGM1      | Phosphoglucomutase-1                                             | 24 | 30  | 11 | 19  |
| P50990 | CCT8      | T-complex protein 1 subunit theta                                | 20 | 26  | 8  | 18  |
| P16403 | HIST1H1C  | Histone H1.2                                                     | 31 | 25  | 15 | 10  |
| Q93034 | CUL5      | Cullin-5                                                         | 16 | 24  | 11 | 13  |
| P36955 | SERPINF1  | Pigment epithelium-derived factor                                | 29 | 24  | 11 | 13  |
| Q53GN4 | WDR1      | WD repeat domain 1, isoform CRA_a (Fragment)                     | 21 | 21  | 12 | 9   |
| Q86YZ3 | HRNR      | Hornerin                                                         | 5  | 20  | 9  | 11  |
| Q93050 | ATP6VOA1  | V-type proton ATPase 116 kDa subunit a isoform 1                 | 15 | 20  | 5  | 15  |
| Q8NHU6 | TDRD7     | Tudor domain-containing protein 7                                | 10 | 19  | 11 | 8   |
| P00918 | CA2       | Carbonic anhydrase 2                                             | 47 | 141 | 54 | 87  |
| Q9HC11 | ANKH      | Progressive ankylosis protein homolog                            | 25 | 75  | 53 | 22  |
| P68104 | EEF1A1    | Elongation factor 1-alpha 1                                      | 24 | 55  | 43 | 12  |
| Q9UL25 | RAB21     | Ras-related protein Rab-21                                       | 40 | 47  | 14 | 33  |
| P30566 | ADSL      | Adenylosuccinate lyase                                           | 20 | 37  | 21 | 16  |
| P28074 | PSMB5     | Proteasome subunit beta type-5                                   | 27 | 36  | 18 | 18  |
| P62873 | GMB1      | Guanine nucleotide-binding protein G(I)/G(S)/G(T) subunit beta-1 | 32 | 35  | 24 | 11  |
| Q8IW45 | NAXD      | ATP-dependent (S)-NAD(P)H-hydrate dehydratase                    | 42 | 32  | 22 | 10  |
| P39060 | COL18A1   | Collagen alpha-1(XVIII) chain                                    | 8  | 29  | 17 | 12  |
| Q6NZ12 | PTRF      | Polymerase I and transcript release factor                       | 27 | 29  | 10 | 19  |
| O60664 | PLIN3     | Perilipin-3                                                      | 27 | 26  | 12 | 14  |
| P02794 | FTH1      | Ferritin heavy chain                                             | 46 | 25  | 3  | 22  |
| Q6IQ22 | RAB12     | Ras-related protein Rab-12                                       | 30 | 24  | 11 | 13  |
| P27824 | CANX      | Calnexin                                                         | 18 | 23  | 15 | 8   |
| P17612 | PRKACA    | cAMP-dependent protein kinase catalytic subunit alpha            | 26 | 22  | 14 | 8   |
| Q96F27 | CHMP6     | Charged multivesicular body protein 6                            | 39 | 22  | 14 | 8   |
| Q04760 | GLO1      | Lactoylglutathione lyase                                         | 43 | 22  | 10 | 12  |
| P02786 | TFRC      | Transferrin receptor protein 1                                   | 15 | 21  | 10 | 11  |
| Q99733 | NAP1L4    | Nucleosome assembly protein 1-like 4                             | 22 | 17  | 7  | 10  |
| P55209 | NAP1L1    | Nucleosome assembly protein 1-like 1                             | 6  | 8   | 3  | 5   |
| P27361 | MAPK3     | Mitogen-activated protein kinase 3                               | 26 | 17  | 7  | 10  |
| P28482 | MAPK1     | Mitogen-activated protein kinase 1                               | 14 | 12  | 2  | 10  |
| P20839 | IMPDH1    | Inosine 5'-monophosphate dehydrogenase 1                         | 11 | 9   | 9  | 0   |
| P12268 | IMPDH2    | Inosine 5'-monophosphate dehydrogenase 2                         | 17 | 8   | 7  | 1   |
| P47755 | CAPZA2    | F-actin-capping protein subunit alpha-2                          | 24 | 11  | 7  | 4   |
| P52907 | CAPZA1    | F-actin-capping protein subunit alpha-1                          | 30 | 8   | 5  | 3   |
| P63244 | RACK1     | Receptor of activated protein C kinase 1                         | 32 | 14  | 9  | 5   |
| P31939 | ATIC      | Bifunctional purine biosynthesis protein PURH                    | 18 | 12  | 1  | 11  |
| P01034 | CST3      | Cystatin-C                                                       | 50 | 146 | 17 | 129 |
| P62834 | RAP1A     | Ras-related protein Rap-1A                                       | 42 | 93  | 23 | 70  |
| P53672 | CRYBA2    | Beta-crystallin A2                                               | 58 | 88  | 63 | 25  |
| P0CG47 | UBB       | Polyubiquitin-B                                                  | 29 | 68  | 39 | 29  |
| P55344 | LIM2      | Isoform 2 of Lens fiber membrane intrinsic protein               | 29 | 32  | 22 | 10  |
| P55344 | LIM2      | Lens fiber membrane intrinsic protein                            | 19 | 27  | 27 | 0   |
| P35625 | TIMP3     | Metalloproteinase inhibitor 3                                    | 36 | 56  | 22 | 34  |
| Q14031 | COL4A6    | Collagen alpha-6(IV) chain                                       | 5  | 39  | 26 | 13  |
| Q9NZL4 | HSPBP1    | Hsp70-binding protein 1                                          | 24 | 27  | 12 | 15  |
| P36405 | ARL3      | ADP-ribosylation factor-like protein 3                           | 64 | 24  | 10 | 14  |
| P04083 | ANXA1     | Annexin A1                                                       | 28 | 19  | 4  | 15  |
| Q9H857 | NT5DC2    | 5'-nucleotidase domain-containing protein 2                      | 21 | 19  | 12 | 7   |
| O95490 | ADGRL2    | Adhesion G protein-coupled receptor L2                           | 7  | 18  | 6  | 12  |
| P34932 | HSPA4     | Heat shock 70 kDa protein 4                                      | 13 | 17  | 6  | 11  |
| P27816 | MAP4      | Microtubule-associated protein 4                                 | 9  | 13  | 13 | 0   |
| Q96EF6 | FBXO17    | F-box only protein 17                                            | 34 | 59  | 17 | 42  |
| Q9GZP4 | PITHD1    | PITH domain-containing protein 1                                 | 38 | 48  | 15 | 33  |
| P61163 | ACTR1A    | Alpha-centractin                                                 | 27 | 42  | 29 | 13  |
| Q99685 | MGLL      | Monoglyceride lipase                                             | 38 | 41  | 16 | 25  |
| Q15257 | PPP2R4    | Isoform 1 of Serine/threonine-protein phosphatase 2A activator   | 29 | 30  | 15 | 15  |
| Q71DI3 | HIST2H3A  | Histone H3.2                                                     | 40 | 27  | 23 | 4   |
| Q43592 | XPOT      | Exportin-T                                                       | 9  | 24  | 4  | 20  |
| P52565 | ARHGDI1   | Rho GDP-dissociation inhibitor 1                                 | 30 | 21  | 4  | 17  |
| Q99536 | VAT1      | Synaptic vesicle membrane protein VAT-1 homolog                  | 16 | 21  | 6  | 15  |
| P46926 | GNPDA1    | Glucosamine-6-phosphate isomerase 1                              | 38 | 19  | 12 | 7   |
| Q8NFZ8 | CADM4     | Cell adhesion molecule 4                                         | 24 | 19  | 11 | 8   |
| Q9H0C3 | TMEM117   | Transmembrane protein 117                                        | 9  | 19  | 2  | 17  |
| P02458 | COL2A1    | Collagen alpha-1(II) chain                                       | 3  | 18  | 17 | 1   |
| Q9NTJ4 | MAN2C1    | Alpha-mannosidase 2C1                                            | 7  | 16  | 5  | 11  |
| P48509 | CD151     | CD151 antigen                                                    | 21 | 16  | 11 | 5   |
| P49189 | ALDH9A1   | 4-trimethylaminobutyraldehyde dehydrogenase                      | 16 | 16  | 2  | 14  |
| Q15631 | TSN       | Translin                                                         | 36 | 16  | 4  | 12  |
| Q9UHY7 | ENOPH1    | Enolase-phosphatase E1                                           | 30 | 15  | 11 | 4   |
| P61018 | RAB4B     | Ras-related protein Rab-4B                                       | 47 | 15  | 2  | 13  |
| Q43242 | PSMD3     | 26S proteasome non-ATPase regulatory subunit 3                   | 15 | 14  | 11 | 3   |
| Q96F07 | CYFIP2    | Isoform 2 of Cytoplasmic FMR1-interacting protein 2              | 5  | 13  | 6  | 7   |
| Q9H4A4 | RNPEP     | Amino-peptidase B                                                | 15 | 13  | 7  | 6   |
| P21964 | COMT      | Catechol O-methyltransferase                                     | 46 | 13  | 10 | 3   |
| P43353 | ALDH3B1   | Aldehyde dehydrogenase family 3 member B1                        | 12 | 9   | 5  | 4   |
| P51648 | ALDH3A2   | Fatty aldehyde dehydrogenase                                     | 9  | 4   | 4  | 0   |
| P33527 | ABCC1     | Multidrug resistance-associated protein 1                        | 5  | 11  | 3  | 8   |

|        |          |                                                                    |    |    |    |    |
|--------|----------|--------------------------------------------------------------------|----|----|----|----|
| P36578 | RPL4     | 60S ribosomal protein L4                                           | 19 | 10 | 9  | 1  |
| Q16851 | UGP2     | UTP--glucose-1-phosphate uridylyltransferase                       | 14 | 10 | 6  | 4  |
| P06753 | TPM3     | Isoform 6 of Tropomyosin alpha-3 chain                             | 27 | 9  | 4  | 5  |
| Q13098 | GPS1     | COP9 signalosome complex subunit 1                                 | 15 | 9  | 3  | 6  |
| P05026 | ATP1B1   | Sodium/potassium-transporting ATPase subunit beta-1                | 24 | 53 | 20 | 33 |
| P41222 | PTGDS    | Prostaglandin-H2 D-isomerase                                       | 36 | 40 | 14 | 26 |
| Q92542 | NCSTN    | Nicastrin                                                          | 12 | 29 | 15 | 14 |
| Q15223 | NECTIN1  | Nectin-1                                                           | 18 | 23 | 16 | 7  |
| P08195 | SLC3A2   | 4F2 cell-surface antigen heavy chain                               | 9  | 22 | 3  | 19 |
| Q9NV96 | TMEM30A  | Cell cycle control protein 50A                                     | 12 | 22 | 13 | 9  |
| O00519 | FAAH     | Fatty-acid amide hydrolase 1                                       | 18 | 21 | 6  | 15 |
| Q16270 | IGFBP7   | Insulin-like growth factor-binding protein 7                       | 26 | 19 | 11 | 8  |
| Q14152 | EIF3A    | Eukaryotic translation initiation factor 3 subunit A               | 5  | 18 | 6  | 12 |
| P0C870 | JMJD7    | JmjC domain-containing protein 7                                   | 25 | 18 | 7  | 11 |
| P15260 | IFNGR1   | Interferon gamma receptor 1                                        | 11 | 18 | 5  | 13 |
| Q08357 | SLC20A2  | Sodium-dependent phosphate transporter 2                           | 9  | 17 | 1  | 16 |
| Q99569 | PKP4     | Plakophilin-4                                                      | 5  | 17 | 10 | 7  |
| P09455 | RBP1     | Retinol-binding protein 1                                          | 30 | 16 | 2  | 14 |
| P53007 | SLC25A1  | Tricarboxylate transport protein, mitochondrial                    | 20 | 16 | 11 | 5  |
| P60891 | PRPS1    | Ribose-phosphate pyrophosphokinase 1                               | 18 | 15 | 7  | 8  |
| P63010 | AP2B1    | AP-2 complex subunit beta                                          | 7  | 15 | 5  | 10 |
| P61088 | UBE2N    | Ubiquitin-conjugating enzyme E2 N                                  | 47 | 15 | 9  | 6  |
| Q9HAB8 | PPCS     | Phosphopantothenate--cysteine ligase                               | 14 | 14 | 4  | 11 |
| Q9P0L0 | VAPA     | Vesicle-associated membrane protein-associated protein A           | 29 | 15 | 10 | 5  |
| P62826 | RAN      | GTP-binding nuclear protein Ran                                    | 28 | 15 | 13 | 2  |
| P05198 | EIF2S1   | Eukaryotic translation initiation factor 2 subunit 1               | 21 | 15 | 10 | 5  |
| P04004 | VTN      | Vitronectin                                                        | 11 | 15 | 1  | 14 |
| P13716 | ALAD     | Delta-aminolevulinic acid dehydratase                              | 20 | 14 | 9  | 5  |
| P06396 | GSN      | Gelsolin                                                           | 10 | 14 | 4  | 10 |
| O00534 | VWASA    | von Willebrand factor A domain-containing protein 5A               | 9  | 14 | 6  | 8  |
| P26640 | VARS     | Valine--tRNA ligase                                                | 5  | 14 | 4  | 10 |
| P17931 | LGALS3   | Galectin-3                                                         | 23 | 14 | 7  | 7  |
| P26639 | TARS     | Threonine--tRNA ligase, cytoplasmic                                | 11 | 13 | 6  | 7  |
| Q96DA2 | RAB39B   | Ras-related protein Rab-39B                                        | 32 | 13 | 3  | 10 |
| P83731 | RPL24    | 60S ribosomal protein L24                                          | 34 | 13 | 10 | 3  |
| Q14767 | LTBP2    | Latent-transforming growth factor beta-binding protein 2           | 4  | 13 | 3  | 10 |
| Q9UHN6 | TMEM2    | Transmembrane protein 2                                            | 5  | 12 | 5  | 7  |
| Q96QK1 | VPS35    | Vacuolar protein sorting-associated protein 35                     | 8  | 12 | 5  | 7  |
| P09960 | LTA4H    | Leukotriene A-4 hydrolase                                          | 13 | 12 | 0  | 12 |
| Q9UIA9 | XPO7     | Exportin-7                                                         | 7  | 12 | 5  | 7  |
| P78330 | PSPH     | Phosphoserine phosphatase                                          | 22 | 11 | 4  | 7  |
| P00533 | EGFR     | Epidermal growth factor receptor                                   | 6  | 11 | 6  | 5  |
| P48147 | PREP     | Prolyl endopeptidase                                               | 12 | 11 | 5  | 6  |
| Q14787 | TNPO2    | Isoform 2 of Transportin-2                                         | 6  | 10 | 2  | 8  |
| Q9P2T1 | GMPR2    | GMP reductase 2                                                    | 30 | 10 | 7  | 3  |
| Q92729 | PTPRU    | Receptor-type tyrosine-protein phosphatase U                       | 4  | 10 | 6  | 4  |
| Q86UX2 | ITH5     | Inter-alpha-trypsin inhibitor heavy chain H5                       | 6  | 9  | 9  | 0  |
| P61247 | RPS3A    | 40S ribosomal protein S3a                                          | 20 | 9  | 9  | 0  |
| P60981 | DSTN     | Destrin                                                            | 28 | 7  | 5  | 2  |
| Q9Y281 | CFL2     | Cofilin-2                                                          | 23 | 3  | 0  | 3  |
| Q92696 | RABGGTA  | Geranylgeranyl transferase type-2 subunit alpha                    | 17 | 9  | 4  | 5  |
| Q9Y262 | EIF3L    | Eukaryotic translation initiation factor 3 subunit L               | 11 | 8  | 4  | 4  |
| P62241 | RPS8     | 40S ribosomal protein S8                                           | 25 | 8  | 8  | 0  |
| O95834 | EML2     | Echinoderm microtubule-associated protein-like 2                   | 11 | 7  | 3  | 4  |
| P54289 | CACNA2D1 | Voltage-dependent calcium channel subunit alpha-2/delta-1          | 6  | 7  | 2  | 5  |
| Q9P273 | TENM3    | Teneurin-3                                                         | 2  | 7  | 3  | 4  |
| P55064 | AQP5     | Aquaporin-5                                                        | 13 | 71 | 25 | 46 |
| Q9UI40 | SLC24A2  | Isoform 2 of Sodium/potassium/calcium exchanger 2                  | 10 | 40 | 21 | 19 |
| Q96C23 | GALM     | Aldose 1-epimerase                                                 | 21 | 37 | 2  | 35 |
| Q8IVW8 | SPNS2    | Protein spinster homolog 2                                         | 12 | 35 | 7  | 28 |
| Q86Y39 | NDUFA11  | NADH dehydrogenase [ubiquinone] 1 alpha subcomplex subunit 1:      | 49 | 32 | 15 | 17 |
| P61457 | PCBD1    | Pterin-4-alpha-carbinolamine dehydratase                           | 58 | 25 | 4  | 21 |
| P61626 | LYZ      | Lysozyme C                                                         | 22 | 25 | 18 | 7  |
| P48029 | SLC6A8   | Sodium- and chloride-dependent creatine transporter 1              | 10 | 24 | 5  | 19 |
| P22234 | PAICS    | Multifunctional protein ADE2                                       | 16 | 23 | 11 | 12 |
| P46976 | GYG1     | Glycogenin-1                                                       | 12 | 23 | 12 | 11 |
| Q8TD20 | SLC2A12  | Solute carrier family 2, facilitated glucose transporter member 12 | 13 | 23 | 8  | 15 |
| Q96FW1 | OTUB1    | Ubiquitin thioesterase OTUB1                                       | 23 | 20 | 6  | 14 |
| Q15435 | PPP1R7   | Protein phosphatase 1 regulatory subunit 7                         | 19 | 19 | 3  | 16 |
| P61160 | ACTR2    | Actin-related protein 2                                            | 13 | 18 | 10 | 8  |
| O75131 | CPNE3    | Copine-3                                                           | 13 | 16 | 7  | 9  |
| Q9P0J0 | NDUFA13  | NADH dehydrogenase [ubiquinone] 1 alpha subcomplex subunit 1:      | 43 | 16 | 10 | 6  |
| O00442 | RTCA     | RNA 3'-terminal phosphate cyclase                                  | 16 | 15 | 9  | 6  |
| P00491 | PNP      | Purine nucleoside phosphorylase                                    | 24 | 15 | 7  | 8  |
| P32320 | CDA      | Cytidine deaminase                                                 | 60 | 15 | 10 | 5  |
| Q8NCHO | CHST14   | Carbohydrate sulfotransferase 14                                   | 15 | 14 | 1  | 13 |
| Q9NQW7 | XPNPEP1  | Xaa-Pro aminopeptidase 1                                           | 9  | 14 | 3  | 11 |
| P21980 | TGM2     | Protein-glutamine gamma-glutamyltransferase 2                      | 8  | 14 | 2  | 12 |
| Q13867 | BLMH     | Bleomycin hydrolase                                                | 10 | 13 | 7  | 6  |
| Q9Y624 | F11R     | Junctional adhesion molecule A                                     | 14 | 13 | 9  | 4  |
| Q13057 | COASY    | Bifunctional coenzyme A synthase                                   | 7  | 13 | 1  | 12 |
| P49720 | PSMB3    | Proteasome subunit beta type-3                                     | 28 | 13 | 5  | 8  |
| O75874 | IDH1     | Isocitrate dehydrogenase [NADP] cytoplasmic                        | 14 | 13 | 7  | 6  |
| Q99426 | TBCB     | Tubulin-folding cofactor B                                         | 20 | 12 | 11 | 1  |
| P16435 | POR      | NADPH--cytochrome P450 reductase                                   | 11 | 12 | 10 | 2  |
| Q3LXA3 | TKFC     | Triokinase/FMN cyclase                                             | 13 | 12 | 2  | 10 |
| Q01518 | CAP1     | Adenylyl cyclase-associated protein 1                              | 13 | 12 | 8  | 4  |
| Q9UQ03 | CORO2B   | Coronin-2B                                                         | 11 | 12 | 5  | 7  |
| Q9BZ14 | SLC25A39 | Solute carrier family 25 member 39                                 | 14 | 11 | 4  | 7  |

|        |          |                                                                   |    |    |    |    |
|--------|----------|-------------------------------------------------------------------|----|----|----|----|
| Q15008 | PSMD6    | 26S proteasome non-ATPase regulatory subunit 6                    | 13 | 11 | 10 | 1  |
| P61158 | ACTR3    | Actin-related protein 3                                           | 13 | 11 | 8  | 3  |
| P55072 | VCP      | Transitional endoplasmic reticulum ATPase                         | 8  | 11 | 4  | 7  |
| Q16531 | DDB1     | DNA damage-binding protein 1                                      | 5  | 10 | 3  | 7  |
| Q43813 | LANCL1   | LanC-like protein 1                                               | 16 | 10 | 8  | 2  |
| P09543 | CNP      | 2',3'-cyclic-nucleotide 3'-phosphodiesterase                      | 12 | 9  | 5  | 4  |
| P34896 | SHMT1    | Serine hydroxymethyltransferase, cytosolic                        | 13 | 8  | 3  | 5  |
| Q43790 | KRT86    | Keratin, type II cuticular Hb6                                    | 9  | 7  | 7  | 0  |
| Q8N2K0 | ABHD12   | Monoacylglycerol lipase ABHD12                                    | 18 | 7  | 6  | 1  |
| P55884 | EIF3B    | Eukaryotic translation initiation factor 3 subunit B              | 5  | 7  | 2  | 5  |
| Q9NUU7 | DDX19A   | ATP-dependent RNA helicase DDX19A                                 | 7  | 7  | 5  | 2  |
| Q9H9T3 | ELP3     | Elongator complex protein 3                                       | 9  | 7  | 4  | 3  |
| P62140 | PPP1CB   | Serine/threonine-protein phosphatase PP1-beta catalytic subunit   | 23 | 7  | 5  | 2  |
| Q9Y6C2 | EMILIN1  | EMILIN-1                                                          | 7  | 7  | 0  | 7  |
| P05556 | ITGB1    | Integrin beta-1                                                   | 9  | 6  | 3  | 3  |
| P10301 | RRAS     | Ras-related protein R-Ras                                         | 14 | 4  | 0  | 4  |
| P62070 | RRAS2    | Ras-related protein R-Ras2                                        | 17 | 4  | 1  | 3  |
| P46781 | RPS9     | 40S ribosomal protein S9                                          | 20 | 6  | 6  | 0  |
| Q9P265 | DIP2B    | Disco-interacting protein 2 homolog B                             | 3  | 6  | 4  | 2  |
| P21796 | VDAC1    | Voltage-dependent anion-selective channel protein 1               | 12 | 4  | 4  | 0  |
| Q9Y277 | VDAC3    | Voltage-dependent anion-selective channel protein 3               | 11 | 4  | 4  | 0  |
| Q9BXW6 | OSBPPLA  | Oxysterol-binding protein-related protein 1                       | 5  | 6  | 5  | 1  |
| Q43795 | MYO1B    | Unconventional myosin-Ib                                          | 6  | 6  | 3  | 3  |
| P58005 | SESN3    | Sestrin-3                                                         | 14 | 6  | 3  | 3  |
| P10599 | TXN      | Thioredoxin                                                       | 40 | 6  | 2  | 4  |
| Q9BT78 | COPS4    | COP9 signalosome complex subunit 4                                | 15 | 6  | 3  | 3  |
| P62269 | RPS18    | 40S ribosomal protein S18                                         | 28 | 5  | 4  | 1  |
| Q15530 | PDPK1    | 3-phosphoinositide-dependent protein kinase 1                     | 13 | 5  | 4  | 1  |
| Q6P5S8 | IGK@     | IGK@ protein                                                      | 25 | 43 | 11 | 32 |
| Q9NZHO | GPRC5B   | G-protein coupled receptor family C group 5 member B              | 10 | 40 | 8  | 32 |
| P21926 | CD9      | CD9 antigen                                                       | 14 | 25 | 5  | 20 |
| P22352 | GPX3     | Glutathione peroxidase 3                                          | 12 | 18 | 4  | 14 |
| P04271 | S100B    | Protein S100-B                                                    | 45 | 18 | 18 | 0  |
| P21281 | ATP6V1B2 | V-type proton ATPase subunit B, brain isoform                     | 10 | 18 | 6  | 12 |
| P08581 | MET      | Hepatocyte growth factor receptor                                 | 3  | 17 | 1  | 16 |
| Q8WUM4 | PDCD6IP  | Isoform 2 of Programmed cell death 6-interacting protein          | 5  | 15 | 4  | 11 |
| P41250 | GARS     | Glycine--tRNA ligase                                              | 8  | 15 | 2  | 13 |
| Q6IAA8 | LAMTOR1  | Ragulator complex protein LAMTOR1                                 | 31 | 14 | 7  | 7  |
| P29992 | GNA11    | Guanine nucleotide-binding protein subunit alpha-11               | 13 | 14 | 11 | 3  |
| Q724W1 | DCXR     | L-xylulose reductase                                              | 20 | 14 | 7  | 7  |
| Q16775 | HAGH     | Hydroxyacylglutathione hydrolase, mitochondrial                   | 19 | 14 | 3  | 11 |
| P15151 | PVR      | Poliovirus receptor                                               | 13 | 13 | 9  | 4  |
| P55001 | MFAP2    | Microfibrillar-associated protein 2                               | 18 | 13 | 13 | 0  |
| Q8N3E9 | PLCD3    | 1-phosphatidylinositol 4,5-bisphosphate phosphodiesterase delta-  | 7  | 13 | 3  | 10 |
| Q96IU4 | ABHD14B  | Protein ABHD14B                                                   | 34 | 13 | 5  | 8  |
| P15086 | CPB1     | Carboxypeptidase B                                                | 11 | 12 | 5  | 7  |
| Q5VZM2 | RRAGB    | Ras-related GTP-binding protein B                                 | 13 | 12 | 4  | 8  |
| Q9GZT8 | NIF3L1   | NIF3-like protein 1                                               | 12 | 12 | 8  | 4  |
| Q9BZV2 | SLC19A3  | Thiamine transporter 2                                            | 8  | 12 | 4  | 8  |
| O00232 | PSMD12   | 26S proteasome non-ATPase regulatory subunit 12                   | 10 | 12 | 2  | 10 |
| Q43488 | AKR7A2   | Aflatoxin B1 aldehyde reductase member 2                          | 15 | 11 | 6  | 5  |
| Q9UI12 | ATP6V1H  | V-type proton ATPase subunit H                                    | 11 | 11 | 1  | 10 |
| P29218 | IMPA1    | Inositol monophosphatase 1                                        | 13 | 10 | 4  | 6  |
| P14324 | FDP5     | Farnesyl pyrophosphate synthase                                   | 19 | 10 | 3  | 7  |
| P46952 | HAAO     | 3-hydroxyanthranilate 3,4-dioxygenase                             | 19 | 10 | 0  | 10 |
| P62266 | RPS23    | 40S ribosomal protein S23                                         | 29 | 10 | 8  | 2  |
| Q95373 | IPO7     | Importin-7                                                        | 6  | 10 | 6  | 4  |
| P00441 | SOD1     | Superoxide dismutase [Cu-Zn]                                      | 45 | 10 | 8  | 2  |
| Q75915 | ARL6IP5  | PRA1 family protein 3                                             | 20 | 10 | 3  | 7  |
| P21399 | ACO1     | Cytoplasmic aconitate hydratase                                   | 5  | 10 | 4  | 6  |
| B40UF1 |          | cDNA FLJ59760, highly similar to 1,4-alpha-glucan branching enzyn | 7  | 10 | 6  | 4  |
| B2RDN1 |          | cDNA, FLJ96690, highly similar to Homo sapiens glutathione transf | 32 | 9  | 7  | 2  |
| Q92597 | NDRG1    | Protein NDRG1                                                     | 12 | 9  | 3  | 6  |
| Q8IWA5 | SLC44A2  | Choline transporter-like protein 2                                | 4  | 9  | 4  | 5  |
| P09211 | GSTP1    | Glutathione S-transferase P                                       | 34 | 9  | 2  | 7  |
| Q6UW68 | TMEM205  | Transmembrane protein 205                                         | 22 | 9  | 6  | 3  |
| P12235 | SLC25A4  | ADP/ATP translocase 1                                             | 20 | 9  | 9  | 0  |
| Q07960 | ARHGAP1  | Rho GTPase-activating protein 1                                   | 11 | 8  | 2  | 6  |
| Q96A11 | GAL3ST3  | Galactose-3-O-sulfotransferase 3                                  | 11 | 8  | 2  | 6  |
| Q9BWQ8 | FAIM2    | Protein lifeguard 2                                               | 14 | 8  | 5  | 3  |
| P41091 | EIF2S3   | Eukaryotic translation initiation factor 2 subunit 3              | 13 | 8  | 4  | 4  |
| Q9NTK5 | OLA1     | Obg-like ATPase 1                                                 | 15 | 8  | 4  | 4  |
| P02787 | TF       | Serotransferrin                                                   | 8  | 8  | 7  | 1  |
| P10745 | RBP3     | Retinol-binding protein 3                                         | 4  | 8  | 0  | 8  |
| P47756 | CAP2B    | F-actin-capping protein subunit beta                              | 12 | 8  | 2  | 6  |
| Q9NZJ7 | MTCH1    | Mitochondrial carrier homolog 1                                   | 11 | 7  | 7  | 0  |
| P51151 | RAB9A    | Ras-related protein Rab-9A                                        | 24 | 7  | 1  | 6  |
| Q9Y2A7 | NCKAP1   | Nck-associated protein 1                                          | 4  | 7  | 3  | 4  |
| P04844 | RPN2     | Dolichyl-diphosphooligosaccharide--protein glycosyltransferase su | 10 | 7  | 3  | 4  |
| P14868 | DARS     | Aspartate--tRNA ligase, cytoplasmic                               | 8  | 6  | 2  | 4  |
| Q13642 | FHL1     | Isoform 1 of Four and a half LIM domains protein 1                | 16 | 6  | 3  | 3  |
| Q15582 | TGFBI    | Transforming growth factor-beta-induced protein ig-h3             | 7  | 6  | 1  | 5  |
| Q5T457 | UBR4     | E3 ubiquitin-protein ligase UBR4                                  | 1  | 6  | 2  | 4  |
| P31153 | MAT2A    | S-adenosylmethionine synthase isoform type-2                      | 12 | 6  | 2  | 4  |
| Q8WTV0 | SCARB1   | Scavenger receptor class B member 1                               | 7  | 6  | 2  | 4  |
| P15374 | UCHL3    | Ubiquitin carboxyl-terminal hydrolase isozyme L3                  | 23 | 6  | 2  | 4  |
| Q9UQM7 | CAMK2A   | Calcium/calmodulin-dependent protein kinase type II subunit alph  | 13 | 6  | 2  | 4  |
| P04156 | PRNP     | Major prion protein                                               | 15 | 6  | 3  | 3  |
| P43007 | SLC1A4   | Neutral amino acid transporter A                                  | 8  | 6  | 3  | 3  |

|        |           |                                                                    |    |    |    |    |
|--------|-----------|--------------------------------------------------------------------|----|----|----|----|
| Q9BTW9 | TBCD      | Tubulin-specific chaperone D                                       | 3  | 6  | 3  | 3  |
| P17174 | GOT1      | Aspartate aminotransferase, cytoplasmic                            | 15 | 6  | 2  | 4  |
| P28070 | PSMB4     | Proteasome subunit beta type-4                                     | 20 | 5  | 2  | 3  |
| P60900 | PSMA6     | Proteasome subunit alpha type-6                                    | 18 | 5  | 3  | 2  |
| Q14203 | DCTN1     | Dynactin subunit 1                                                 | 7  | 5  | 4  | 1  |
| Q13214 | SEMA3B    | Semaphorin-3B                                                      | 6  | 5  | 1  | 4  |
| Q555J5 | HP1BP3    | Heterochromatin protein 1-binding protein 3                        | 11 | 5  | 5  | 0  |
| P11766 | ADH5      | Alcohol dehydrogenase class-3                                      | 12 | 5  | 4  | 1  |
| P39023 | RPL3      | 60S ribosomal protein L3                                           | 8  | 5  | 5  | 0  |
| O00159 | MYO1C     | Unconventional myosin-1c                                           | 5  | 5  | 3  | 2  |
| P45880 | VDAC2     | Voltage-dependent anion-selective channel protein 2                | 15 | 5  | 5  | 0  |
| O00303 | EIF3F     | Eukaryotic translation initiation factor 3 subunit F               | 11 | 5  | 1  | 4  |
| Q5VWZ2 | LYPLAL1   | Lysophospholipase-like protein 1                                   | 15 | 5  | 3  | 2  |
| Q12756 | KIF1A     | Kinesin-like protein KIF1A                                         | 3  | 5  | 2  | 3  |
| O00231 | PSMD11    | 26S proteasome non-ATPase regulatory subunit 11                    | 11 | 5  | 2  | 3  |
| P62917 | RPL8      | 60S ribosomal protein L8                                           | 14 | 5  | 4  | 1  |
| P55060 | CSE1L     | Exportin-2                                                         | 4  | 5  | 1  | 4  |
| P15924 | DSP       | Desmoplakin                                                        | 2  | 5  | 1  | 4  |
| Q9Y5L0 | TNPO3     | Transportin-3                                                      | 4  | 4  | 1  | 3  |
| P54687 | BCAT1     | Branched-chain-amino-acid aminotransferase, cytosolic              | 20 | 4  | 4  | 0  |
| Q9NY33 | DPP3      | Dipeptidyl peptidase 3                                             | 7  | 4  | 1  | 3  |
| A0AVT1 | UBA6      | Ubiquitin-like modifier-activating enzyme 6                        | 4  | 4  | 0  | 4  |
| P0COL4 | C4A       | Complement C4-A                                                    | 3  | 4  | 0  | 4  |
| P40926 | MDH2      | Malate dehydrogenase, mitochondrial                                | 15 | 4  | 3  | 1  |
| P30301 | MIP       | Lens fiber major intrinsic protein                                 | 14 | 88 | 38 | 50 |
| Q15836 | VAMP3     | Vesicle-associated membrane protein 3                              | 40 | 75 | 3  | 72 |
| P54709 | ATP1B3    | Sodium/potassium-transporting ATPase subunit beta-3                | 14 | 29 | 6  | 23 |
| O60888 | CUTA      | Protein CutA                                                       | 33 | 26 | 19 | 7  |
| O75663 | TIPRL     | TIP41-like protein                                                 | 18 | 25 | 18 | 7  |
| P04908 | HIST1H2AB | Histone H2A type 1-B/E                                             | 21 | 20 | 9  | 11 |
| P56134 | ATP5J2    | ATP synthase subunit f, mitochondrial                              | 26 | 19 | 11 | 8  |
| Q96CN7 | ISOC1     | Isochorismatase domain-containing protein 1                        | 15 | 19 | 5  | 14 |
| Q9Y5L5 | LENEP     | Lens epithelial cell protein LEP503                                | 44 | 18 | 13 | 5  |
| Q6DKJ4 | NXN       | Nucleoredoxin                                                      | 11 | 18 | 4  | 14 |
| P52758 | HRSP12    | Ribonuclease UK114                                                 | 31 | 17 | 8  | 9  |
| P13987 | CD59      | CD59 glycoprotein                                                  | 16 | 16 | 13 | 3  |
| Q7L5N1 | COPS6     | COP9 signalosome complex subunit 6                                 | 13 | 13 | 8  | 5  |
| P16035 | TIMP2     | Metalloproteinase inhibitor 2                                      | 17 | 12 | 12 | 0  |
| Q9NP72 | RAB18     | Ras-related protein Rab-18                                         | 17 | 12 | 4  | 8  |
| Q16555 | DPYSL2    | Dihydropyrimidinase-related protein 2                              | 6  | 12 | 8  | 4  |
| P63218 | GNG5      | Guanine nucleotide-binding protein G(I)/G(S)/G(O) subunit gamma    | 26 | 11 | 4  | 7  |
| Q9BXM7 | PINK1     | Serine/threonine-protein kinase PINK1, mitochondrial               | 8  | 11 | 6  | 5  |
| P46776 | RPL27A    | 60S ribosomal protein L27a                                         | 24 | 11 | 10 | 1  |
| P59998 | ARPC4     | Actin-related protein 2/3 complex subunit 4                        | 18 | 11 | 2  | 9  |
| P14174 | MIF       | Macrophage migration inhibitory factor                             | 17 | 10 | 10 | 0  |
| Q92905 | COPS5     | COP9 signalosome complex subunit 5                                 | 9  | 10 | 3  | 7  |
| P53004 | BLVRA     | Biliverdin reductase A                                             | 18 | 10 | 5  | 5  |
| P26447 | S100A4    | Protein S100-A4                                                    | 20 | 10 | 2  | 8  |
| Q4G0F5 | VPS26B    | Vacuolar protein sorting-associated protein 26B                    | 7  | 9  | 3  | 6  |
| Q9H0R4 | HDHD2     | Haloacetal dehalogenase-like hydrolase domain-containing protein 2 | 15 | 9  | 1  | 8  |
| P10155 | TROVE2    | 60 kDa SS-A/Ro ribonucleoprotein                                   | 5  | 9  | 6  | 3  |
| P62191 | PSMC1     | 26S protease regulatory subunit 4                                  | 8  | 9  | 6  | 3  |
| Q9Y6M5 | SLC30A1   | Zinc transporter 1                                                 | 8  | 9  | 4  | 5  |
| P49419 | ALDH7A1   | Alpha-aminoacidic semialdehyde dehydrogenase                       | 7  | 9  | 5  | 4  |
| Q8I283 | ALDH16A1  | Aldehyde dehydrogenase family 16 member A1                         | 5  | 8  | 4  | 4  |
| P18433 | PTPRA     | Receptor-type tyrosine-protein phosphatase alpha                   | 4  | 8  | 5  | 3  |
| O94973 | AP2A2     | AP-2 complex subunit alpha-2                                       | 3  | 8  | 3  | 5  |
| O75110 | ATP9A     | Probable phospholipid-transporting ATPase IIA                      | 3  | 8  | 0  | 8  |
| Q969Q5 | RAB24     | Ras-related protein Rab-24                                         | 21 | 7  | 1  | 7  |
| Q9BV20 | MRI1      | Methylthioribose-1-phosphate isomerase                             | 11 | 8  | 3  | 5  |
| Q9UK39 | NOCT      | Nocturnin                                                          | 7  | 7  | 3  | 4  |
| P25787 | PSMA2     | Proteasome subunit alpha type-2                                    | 19 | 7  | 5  | 2  |
| O75144 | ICOSLG    | ICOS ligand                                                        | 14 | 7  | 4  | 3  |
| Q13636 | RAB31     | Ras-related protein Rab-31                                         | 20 | 7  | 0  | 7  |
| Q92530 | PSMF1     | Proteasome inhibitor PI31 subunit                                  | 11 | 7  | 5  | 2  |
| P00505 | GOT2      | Aspartate aminotransferase, mitochondrial                          | 8  | 7  | 2  | 5  |
| O14925 | TIMM23    | Mitochondrial import inner membrane translocase subunit Tim23      | 10 | 7  | 6  | 1  |
| O00743 | PPP6C     | Serine/threonine-protein phosphatase 6 catalytic subunit           | 10 | 7  | 5  | 2  |
| P31689 | DNAJA1    | DnaJ homolog subfamily A member 1                                  | 10 | 7  | 3  | 4  |
| Q96CW1 | AP2M1     | AP-2 complex subunit mu                                            | 6  | 7  | 4  | 3  |
| Q6PIU2 | NCEH1     | Neutral cholesterol ester hydrolase 1                              | 10 | 6  | 4  | 2  |
| Q9NRN7 | AASDHPTT  | L-aminoacidipate-semialdehyde dehydrogenase-phosphopantethein      | 9  | 6  | 2  | 4  |
| O95433 | AHSA1     | Activator of 90 kDa heat shock protein ATPase homolog 1            | 11 | 4  | 6  | 2  |
| Q9BZV1 | UBXN6     | UBX domain-containing protein 6                                    | 9  | 6  | 2  | 4  |
| P26572 | MGAT1     | Alpha-1,3-mannosyl-glycoprotein 2-beta-N-acetylglucosaminyltran    | 6  | 6  | 1  | 5  |
| P42766 | RPL35     | 60S ribosomal protein L35                                          | 22 | 6  | 5  | 1  |
| P52306 | RAP1GDS1  | Rap1 GTPase-GDP dissociation stimulator 1                          | 6  | 6  | 1  | 5  |
| P31213 | SRD5A2    | 3-oxo-5-alpha-steroid 4-dehydrogenase 2                            | 11 | 6  | 4  | 2  |
| Q7LGS6 | RRM2B     | Ribonucleoside-diphosphate reductase subunit M2 B                  | 10 | 6  | 5  | 1  |
| Q9BZG8 | DPH1      | Diphthamide biosynthesis protein 1                                 | 6  | 6  | 0  | 6  |
| Q13617 | CUL2      | Cullin-2                                                           | 3  | 6  | 2  | 4  |
| P12955 | PEPD      | Xaa-Pro dipeptidase                                                | 12 | 6  | 4  | 2  |
| Q9Y230 | RUVBL2    | RuvB-like 2                                                        | 7  | 5  | 2  | 3  |
| Q9Y376 | CAB39     | Calcium-binding protein 39                                         | 9  | 5  | 0  | 5  |
| Q96P70 | IPO9      | Importin-9                                                         | 4  | 5  | 1  | 4  |
| Q13492 | PICALM    | Phosphatidylinositol-binding clathrin assembly protein             | 5  | 5  | 2  | 3  |
| Q9UIC8 | LCMT1     | Leucine carboxyl methyltransferase 1                               | 8  | 5  | 1  | 4  |
| P04843 | RPN1      | Dolichyl-diphosphooligosaccharide--protein glycosyltransferase su  | 7  | 5  | 5  | 0  |
| Q02978 | SLC25A11  | Mitochondrial 2-oxoglutarate/malate carrier protein                | 12 | 5  | 3  | 2  |

|        |          |                                                                 |    |    |    |    |
|--------|----------|-----------------------------------------------------------------|----|----|----|----|
| Q43747 | AP1G1    | AP-1 complex subunit gamma-1                                    | 3  | 5  | 3  | 2  |
| Q9C0E8 | LNP      | Protein lunapark                                                | 8  | 5  | 3  | 2  |
| Q9Y2H2 | INPP5F   | Phosphatidylinositol phosphatase SAC2                           | 3  | 5  | 2  | 3  |
| P13797 | PLS3     | Plastin-3                                                       | 6  | 5  | 0  | 5  |
| P53611 | RABGGTB  | Geranylgeranyl transferase type-2 subunit beta                  | 10 | 5  | 2  | 3  |
| Q02790 | FKBP4    | Peptidyl-prolyl cis-trans isomerase FKBP4                       | 10 | 5  | 5  | 0  |
| Q92614 | MYO18A   | Unconventional myosin-XVIIla                                    | 1  | 5  | 3  | 2  |
| P12429 | ANXA3    | Annexin A3                                                      | 9  | 5  | 1  | 4  |
| P62750 | RPL23A   | 60S ribosomal protein L23a                                      | 15 | 5  | 5  | 0  |
| Q6ZMM2 | ADAMTSL5 | ADAMTS-like protein 5                                           | 12 | 5  | 4  | 1  |
| P49591 | SARS     | Serine--tRNA ligase, cytoplasmic                                | 6  | 5  | 4  | 1  |
| P0CG29 | GSTT2    | Glutathione S-transferase theta-2                               | 12 | 5  | 1  | 4  |
| Q12765 | SCRN1    | Secernin-1                                                      | 10 | 5  | 4  | 1  |
| Q9NVE7 | PANK4    | Pantothenate kinase 4                                           | 5  | 5  | 2  | 3  |
| Q14558 | PRPSAP1  | Phosphoribosyl pyrophosphate synthase-associated protein 1      | 10 | 5  | 2  | 3  |
| Q9UJW0 | DCTN4    | Dynactin subunit 4                                              | 7  | 5  | 3  | 2  |
| Q8TAA9 | VANGL1   | Vang-like protein 1                                             | 7  | 4  | 0  | 4  |
| P0CG05 | IGLC2    | Ig lambda-2 chain C regions                                     | 38 | 4  | 1  | 3  |
| Q9NZL9 | MAT2B    | Methionine adenosyltransferase 2 subunit beta                   | 11 | 4  | 1  | 3  |
| P25788 | PSMA3    | Proteasome subunit alpha type-3                                 | 14 | 4  | 3  | 1  |
| Q9Y6N5 | SQRDL    | Sulfide:quinone oxidoreductase, mitochondrial                   | 8  | 4  | 1  | 3  |
| P53794 | SLC5A3   | Sodium/myo-inositol cotransporter                               | 4  | 4  | 1  | 3  |
| O00391 | QSOX1    | Sulphydryl oxidase 1                                            | 3  | 4  | 1  | 3  |
| Q3SXM5 | HSDL1    | Inactive hydroxysteroid dehydrogenase-like protein 1            | 8  | 4  | 3  | 1  |
| Q5TA50 | CPTP     | Ceramide-1-phosphate transfer protein                           | 15 | 4  | 4  | 0  |
| Q8N336 | ELMOD1   | ELMODomain-containing protein 1                                 | 13 | 4  | 4  | 0  |
| Q14744 | PRMT5    | Protein arginine N-methyltransferase 5                          | 4  | 4  | 3  | 1  |
| P08574 | CYC1     | Cytochrome c1, heme protein, mitochondrial                      | 12 | 4  | 3  | 1  |
| P50747 | HLCS     | Biotin--protein ligase                                          | 3  | 4  | 2  | 2  |
| Q9NZ01 | TECR     | Very-long-chain enoyl-CoA reductase                             | 10 | 4  | 3  | 1  |
| P55290 | CDH13    | Cadherin-13                                                     | 7  | 4  | 2  | 2  |
| P49755 | TMED10   | Transmembrane emp24 domain-containing protein 10                | 18 | 4  | 3  | 1  |
| Q9UKK9 | NUDT5    | ADP-sugar pyrophosphatase                                       | 16 | 4  | 2  | 2  |
| P43034 | PAFAH1B1 | Platelet-activating factor acetylhydrolase IB subunit alpha     | 8  | 4  | 4  | 0  |
| P62753 | RPS6     | 40S ribosomal protein S6                                        | 14 | 4  | 4  | 0  |
| Q5T5P2 | KIAA1217 | Sickle tail protein homolog                                     | 2  | 4  | 0  | 4  |
| O95671 | ASMTL    | N-acetyserotonin O-methyltransferase-like protein               | 7  | 4  | 3  | 1  |
| Q08722 | CD47     | Leukocyte surface antigen CD47                                  | 9  | 4  | 2  | 2  |
| Q13126 | MTAP     | S-methyl-5'-thioadenosine phosphorylase                         | 19 | 4  | 2  | 2  |
| O60502 | MGEA5    | Protein O-GlcNAcase                                             | 4  | 4  | 1  | 3  |
| Q9NQE9 | HINT3    | Histidine triad nucleotide-binding protein 3                    | 15 | 4  | 2  | 2  |
| P23396 | RPS3     | 40S ribosomal protein S3                                        | 13 | 4  | 2  | 2  |
| Q6NUI6 | CHADL    | Chondroadherin-like protein                                     | 6  | 4  | 0  | 4  |
| Q9BX55 | AP1M1    | AP-1 complex subunit mu-1                                       | 8  | 4  | 1  | 3  |
| P04920 | SLC4A2   | Anion exchange protein 2                                        | 3  | 3  | 1  | 2  |
| Q9UNM6 | PSMD13   | 26S proteasome non-ATPase regulatory subunit 13                 | 10 | 3  | 2  | 1  |
| P51572 | BCAP31   | B-cell receptor-associated protein 31                           | 13 | 3  | 2  | 1  |
| P62851 | RPS25    | 40S ribosomal protein S25                                       | 22 | 3  | 3  | 0  |
| O00429 | DNM1L    | Dynamin-1-like protein                                          | 5  | 3  | 2  | 1  |
| O75964 | ATP5L    | ATP synthase subunit g, mitochondrial                           | 36 | 3  | 2  | 3  |
| Q9NZW5 | MPP6     | MAGUK p55 subfamily member 6                                    | 7  | 3  | 1  | 2  |
| Q8Y17  | PNPLA6   | Neuropathy target esterase                                      | 2  | 3  | 1  | 2  |
| P17301 | ITGA2    | Integrin alpha-2                                                | 3  | 3  | 2  | 1  |
| Q99829 | CPNE1    | Copine-1                                                        | 8  | 3  | 1  | 2  |
| Q9NQC3 | RTN4     | Reticulon-4                                                     | 3  | 3  | 1  | 2  |
| P07737 | PFN1     | Profilin-1                                                      | 29 | 3  | 2  | 1  |
| P24539 | ATP5F1   | ATP synthase F(0) complex subunit B1, mitochondrial             | 12 | 3  | 2  | 1  |
| P60228 | EIF3E    | Eukaryotic translation initiation factor 3 subunit E            | 8  | 3  | 2  | 1  |
| Q9Y450 | HBS1L    | HBS1-like protein                                               | 5  | 3  | 1  | 2  |
| Q9BTU6 | PI4K2A   | Phosphatidylinositol 4-kinase type 2-alpha                      | 8  | 3  | 2  | 1  |
| A8K7N0 |          | cDNA FLJ75556, highly similar to Homo sapiens ribosomal protein | 21 | 3  | 2  | 1  |
| P07305 | H1FO     | Histone H1.0                                                    | 14 | 3  | 3  | 0  |
| B3SHH9 | TMEM114  | Transmembrane protein 114                                       | 10 | 34 | 21 | 13 |
| Q96DD7 | SHISA4   | Protein shisa-4                                                 | 20 | 24 | 0  | 24 |
| P04216 | THY1     | Thy-1 membrane glycoprotein                                     | 15 | 22 | 10 | 12 |
| Q13200 | PSMD2    | 26S proteasome non-ATPase regulatory subunit 2                  | 3  | 13 | 4  | 9  |
| Q9C0H2 | TTYH3    | Protein tweety homolog 3                                        | 6  | 10 | 4  | 6  |
| Q12805 | EFEMP1   | EGF-containing fibulin-like extracellular matrix protein 1      | 3  | 10 | 1  | 9  |
| Q99447 | PCYT2    | Ethanolamine-phosphate cytidyltransferase                       | 9  | 8  | 7  | 1  |
| Q14CZ7 | FASTKD3  | FAST kinase domain-containing protein 3, mitochondrial          | 5  | 8  | 4  | 4  |
| Q9H0X4 | FAM234A  | Protein FAM234A                                                 | 6  | 7  | 5  | 2  |
| P26641 | EEF1G    | Elongation factor 1-gamma                                       | 5  | 7  | 2  | 5  |
| O75367 | H2AFY    | Core histone macro-H2A.1                                        | 9  | 7  | 7  | 0  |
| Q99460 | PSMD1    | 26S proteasome non-ATPase regulatory subunit 1                  | 3  | 7  | 7  | 0  |
| P51884 | LUM      | Lumican                                                         | 7  | 7  | 2  | 5  |
| P23229 | ITGA6    | Isoform Alpha-6X1A of Integrin alpha-6                          | 2  | 7  | 1  | 6  |
| Q99969 | RARRES2  | Retinoic acid receptor responder protein 2                      | 14 | 7  | 3  | 4  |
| O60256 | PRPSAP2  | Phosphoribosyl pyrophosphate synthase-associated protein 2      | 8  | 7  | 2  | 5  |
| Q9NPQ8 | RIC8A    | Synembryn-A                                                     | 3  | 7  | 2  | 5  |
| Q27AA2 | IAH1     | Isoamyl acetate-hydrolyzing esterase 1 homolog                  | 9  | 7  | 6  | 1  |
| Q12846 | STX4     | Syntaxin-4                                                      | 7  | 7  | 2  | 5  |
| O75340 | PDCD6    | Programmed cell death protein 6                                 | 13 | 6  | 1  | 5  |
| P48449 | LSS      | Lanosterol synthase                                             | 4  | 6  | 2  | 4  |
| P30046 | DDT      | D-dopachrome decarboxylase                                      | 22 | 6  | 2  | 4  |
| P34096 | RNASE4   | Ribonuclease 4                                                  | 14 | 6  | 6  | 0  |
| Q15036 | SNX17    | Sorting nexin-17                                                | 7  | 6  | 2  | 4  |
| Q9UN52 | COPS3    | COP9 signalosome complex subunit 3                              | 8  | 6  | 3  | 3  |
| O00560 | SDCBP    | Syntenin-1                                                      | 11 | 6  | 6  | 0  |
| Q9P2J2 | IGSF9    | Protein turtle homolog A                                        | 2  | 6  | 4  | 2  |

|        |          |                                                                      |    |   |   |   |
|--------|----------|----------------------------------------------------------------------|----|---|---|---|
| Q95361 | TRIM16   | Tripartite motif-containing protein 16                               | 4  | 6 | 2 | 4 |
| Q968M9 | ARL8A    | ADP-ribosylation factor-like protein 8A                              | 12 | 6 | 0 | 6 |
| Q13637 | RAB32    | Ras-related protein Rab-32                                           | 10 | 5 | 1 | 4 |
| Q9NZ53 | PODXL2   | Podocalyxin-like protein 2                                           | 4  | 5 | 2 | 3 |
| Q9BQA1 | WDR77    | Methylosome protein 50                                               | 6  | 5 | 2 | 3 |
| Q9NZU5 | LMCD1    | LIM and cysteine-rich domains protein 1                              | 8  | 5 | 1 | 4 |
| O75489 | NDUFS3   | NADH dehydrogenase [ubiquinone] iron-sulfur protein 3, mitochondrial | 8  | 5 | 1 | 4 |
| Q99598 | TSNAX    | Translin-associated protein X                                        | 13 | 5 | 5 | 0 |
| P03950 | ANG      | Angiogenin                                                           | 14 | 5 | 5 | 0 |
| P37059 | HSD17B2  | Estradiol 17-beta-dehydrogenase 2                                    | 7  | 5 | 4 | 1 |
| P39656 | DDOST    | Dolichyl-diphosphooligosaccharide--protein glycosyltransferase 48    | 4  | 5 | 3 | 2 |
| P49842 | STK19    | Serine/threonine-protein kinase 19                                   | 3  | 5 | 1 | 4 |
| Q8TEX9 | IPO4     | Importin-4                                                           | 2  | 5 | 1 | 4 |
| Q96597 | MYADM    | Myeloid-associated differentiation marker                            | 10 | 4 | 1 | 3 |
| O75396 | SEC22B   | Vesicle-trafficking protein SEC22b                                   | 10 | 4 | 2 | 2 |
| P23381 | WARS     | Tryptophan--tRNA ligase, cytoplasmic                                 | 5  | 4 | 3 | 1 |
| Q9HB90 | RRAGC    | Ras-related GTP-binding protein C                                    | 5  | 4 | 2 | 2 |
| Q8N0W3 | FUK      | L-fucose kinase                                                      | 2  | 4 | 0 | 4 |
| P54136 | RARS     | Arginine--tRNA ligase, cytoplasmic                                   | 4  | 4 | 1 | 3 |
| Q96NU7 | AMDHD1   | Probable imidazolonepropionase                                       | 5  | 4 | 2 | 2 |
| Q9H477 | RBKS     | Ribokinase                                                           | 5  | 4 | 1 | 3 |
| P35573 | AGL      | Glycogen debranching enzyme                                          | 1  | 4 | 3 | 1 |
| Q8N7X0 | ADGB     | Androglobin                                                          | 1  | 4 | 3 | 1 |
| Q9UBW8 | COP57A   | COP9 signalosome complex subunit 7a                                  | 9  | 4 | 4 | 0 |
| P13073 | COX4I1   | Cytochrome c oxidase subunit 4 isoform 1, mitochondrial              | 11 | 4 | 4 | 0 |
| P54851 | EMP2     | Epithelial membrane protein 2                                        | 6  | 4 | 4 | 0 |
| P05388 | RPLP0    | 60S acidic ribosomal protein P0                                      | 14 | 4 | 4 | 0 |
| Q9HC38 | GLOD4    | Glyoxalase domain-containing protein 4                               | 8  | 4 | 3 | 1 |
| P40123 | CAP2     | Adenylyl cyclase-associated protein 2                                | 7  | 4 | 4 | 0 |
| Q9Y2V2 | CARHSP1  | Calcium-regulated heat-stable protein 1                              | 18 | 4 | 4 | 0 |
| Q9NX46 | ADPRHL2  | Poly(ADP-ribose) glycohydrolase ARH3                                 | 7  | 4 | 2 | 2 |
| Q8NC56 | LEMD2    | LEM domain-containing protein 2                                      | 5  | 4 | 3 | 1 |
| Q92765 | FRZB     | Secreted frizzled-related protein 3                                  | 6  | 4 | 1 | 3 |
| P35612 | ADD2     | Beta-adducin                                                         | 3  | 4 | 3 | 1 |
| A0A068 |          | Ig heavy chain variable region (Fragment)                            | 13 | 4 | 0 | 4 |
| Q15198 | PDGFRL   | Platelet-derived growth factor receptor-like protein                 | 5  | 4 | 0 | 4 |
| Q9BU40 | CHRD1    | Chordin-like protein 1                                               | 5  | 4 | 1 | 3 |
| P04080 | CSTB     | Cystatin-B                                                           | 24 | 4 | 2 | 2 |
| Q96FV2 | SCRN2    | Secernin-2                                                           | 13 | 4 | 4 | 0 |
| P20073 | ANXA7    | Annexin A7                                                           | 4  | 4 | 3 | 1 |
| P25789 | PSMA4    | Proteasome subunit alpha type-4                                      | 11 | 4 | 2 | 2 |
| Q8N8N7 | PTGR2    | Prostaglandin reductase 2                                            | 6  | 4 | 1 | 3 |
| O95747 | OXSR1    | Serine/threonine-protein kinase OSR1                                 | 5  | 4 | 0 | 4 |
| Q96CC6 | RHBDF1   | Inactive rhomboid protein 1                                          | 4  | 3 | 3 | 0 |
| P53602 | MVD      | Diphosphomevalonate decarboxylase                                    | 5  | 3 | 2 | 1 |
| P02768 | ALB      | Serum albumin                                                        | 4  | 3 | 1 | 2 |
| Q9Y5P6 | GMPPB    | Mannose-1-phosphate guanylyltransferase beta                         | 6  | 3 | 0 | 3 |
| P62829 | RPL23    | 60S ribosomal protein L23                                            | 21 | 3 | 2 | 1 |
| Q9UGT4 | SUSD2    | Sushi domain-containing protein 2                                    | 4  | 3 | 0 | 3 |
| Q14697 | GANAB    | Neutral alpha-glucosidase AB                                         | 3  | 3 | 3 | 0 |
| P08174 | CD55     | Complement decay-accelerating factor                                 | 4  | 3 | 3 | 0 |
| Q9HA65 | TBC1D17  | TBC1 domain family member 17                                         | 3  | 3 | 0 | 3 |
| P62701 | RPS4X    | 40S ribosomal protein S4, X isoform                                  | 7  | 3 | 3 | 0 |
| Q15628 | TRADD    | Tumor necrosis factor receptor type 1-associated DEATH domain p      | 6  | 3 | 1 | 2 |
| P27635 | RPL10    | 60S ribosomal protein L10                                            | 10 | 3 | 2 | 1 |
| Q8N4T0 | CPA6     | Carboxypeptidase A6                                                  | 6  | 3 | 2 | 1 |
| P48729 | CSNK1A1  | Casein kinase I isoform alpha                                        | 7  | 3 | 2 | 1 |
| Q9BX19 | NAA15    | N-alpha-acetyltransferase 15, NatA auxiliary subunit                 | 2  | 3 | 1 | 2 |
| O00505 | KPNA3    | Importin subunit alpha-4                                             | 4  | 3 | 1 | 2 |
| B5ME19 | EIF3CL   | Eukaryotic translation initiation factor 3 subunit C-like protein    | 2  | 3 | 1 | 2 |
| C9J069 | C9orf172 | Uncharacterized protein C9orf172                                     | 3  | 3 | 3 | 0 |
| P53680 | AP2S1    | AP-2 complex subunit sigma                                           | 11 | 3 | 1 | 2 |
| Q43776 | NARS     | Asparagine--tRNA ligase, cytoplasmic                                 | 3  | 3 | 3 | 0 |
| Q04323 | UBXN1    | UBX domain-containing protein 1                                      | 7  | 3 | 1 | 2 |
| Q13444 | ADAM15   | Disintegrin and metalloproteinase domain-containing protein 15       | 3  | 3 | 1 | 2 |
| Q9BQ24 | ZFYVE21  | Zinc finger FYVE domain-containing protein 21                        | 13 | 3 | 2 | 1 |
| Q9UBX1 | CTSF     | Cathepsin F                                                          | 4  | 3 | 0 | 3 |
| Q13630 | TSTA3    | GDP-L-fucose synthase                                                | 8  | 3 | 1 | 2 |
| P61764 | STXBP1   | Syntaxin-binding protein 1                                           | 3  | 3 | 2 | 1 |
| Q96AD5 | PNPLA2   | Patatin-like phospholipase domain-containing protein 2               | 5  | 3 | 1 | 2 |
| Q14194 | CRMP1    | Dihydropyrimidinase-related protein 1                                | 3  | 3 | 2 | 1 |
| P62847 | RPS24    | 40S ribosomal protein S24                                            | 20 | 3 | 3 | 0 |
| P25325 | MPST     | 3-mercaptopyruvate sulfurtransferase                                 | 10 | 3 | 0 | 3 |
| B4E082 |          | cDNA FLJ51426, highly similar to Adapter-related protein complex     | 4  | 3 | 1 | 2 |
| Q9HC10 | OTOF     | Otoferlin                                                            | 1  | 3 | 2 | 1 |
| Q9NX14 | NDUFB11  | NADH dehydrogenase [ubiquinone] 1 beta subcomplex subunit 11         | 12 | 3 | 2 | 1 |
| P07741 | APRT     | Adenine phosphoribosyltransferase                                    | 12 | 3 | 0 | 3 |
| P51665 | PSMD7    | 26S proteasome non-ATPase regulatory subunit 7                       | 6  | 3 | 3 | 0 |
| Q92954 | PRG4     | Proteoglycan 4                                                       | 3  | 3 | 1 | 2 |
| Q35Y77 | UGT3A2   | UDP-glucuronosyltransferase 3A2                                      | 6  | 3 | 3 | 0 |
| Q53H96 | PYCR1    | Pyruvate-5-carboxylate reductase 3                                   | 7  | 3 | 2 | 1 |
| Q9Y255 | PRELID1  | PRELI domain-containing protein 1, mitochondrial                     | 9  | 3 | 2 | 1 |
| Q03154 | ACY1     | Aminoacylase-1                                                       | 4  | 3 | 2 | 1 |
| Q43396 | TXNL1    | Thioredoxin-like protein 1                                           | 7  | 3 | 0 | 3 |
| Q95573 | ACSL3    | Long-chain-fatty-acid--CoA ligase 3                                  | 3  | 2 | 2 | 0 |
| Q9UKS6 | PACSN3   | Protein kinase C and casein kinase substrate in neurons protein 3    | 5  | 2 | 0 | 2 |
| Q8TAD2 | IL17D    | Interleukin-17D                                                      | 6  | 2 | 0 | 2 |
| Q06055 | ATP5G2   | ATP synthase F(0) complex subunit C2, mitochondrial                  | 11 | 2 | 0 | 2 |
| P61201 | COP52    | COP9 signalosome complex subunit 2                                   | 7  | 2 | 2 | 0 |

|        |          |                                                                        |    |   |   |   |
|--------|----------|------------------------------------------------------------------------|----|---|---|---|
| Q96CD0 | FBXL8    | F-box/LRR-repeat protein 8                                             | 8  | 2 | 0 | 2 |
| P07203 | GPX1     | Glutathione peroxidase 1                                               | 12 | 2 | 2 | 0 |
| O14521 | SDHD     | Succinate dehydrogenase [ubiquinone] cytochrome b small subunit        | 13 | 2 | 2 | 0 |
| Q9Y5V6 | ST14     | Suppressor of tumorigenicity 14 protein                                | 7  | 2 | 2 | 0 |
| Q5D862 | FLG2     | Filaggrin-2                                                            | 2  | 2 | 2 | 0 |
| P62714 | PPP2CB   | Serine/threonine-protein phosphatase 2A catalytic subunit beta isoform | 9  | 2 | 2 | 0 |
| Q7RTR2 | NLR3     | Protein NLR3                                                           | 3  | 2 | 2 | 0 |
| P60880 | SNAP25   | Synaptosomal-associated protein 25                                     | 13 | 2 | 2 | 0 |
| P08648 | ITGA5    | Integrin alpha-5                                                       | 2  | 2 | 0 | 2 |
| P34949 | MPI      | Mannose-6-phosphate isomerase                                          | 8  | 2 | 0 | 2 |
| P61769 | B2M      | Beta-2-microglobulin                                                   | 17 | 2 | 0 | 2 |
| Q15366 | PCBP2    | Poly(rC)-binding protein 2                                             | 8  | 2 | 2 | 0 |
| Q16773 | KYAT1    | Kynurenine--oxoglutarate transaminase 1                                | 9  | 2 | 2 | 0 |
| P12081 | HARS     | Histidine--tRNA ligase, cytoplasmic                                    | 3  | 2 | 0 | 2 |
| E9PAV3 | NACA     | Nascent polypeptide-associated complex subunit alpha, muscle-specific  | 1  | 2 | 0 | 2 |
| Q8WUA7 | TBC1D22A | TBC1 domain family member 22A                                          | 4  | 2 | 0 | 2 |
| Q9C0C9 | UBE2O    | (E3-independent) E2 ubiquitin-conjugating enzyme                       | 2  | 2 | 2 | 0 |
| P06576 | ATP5B    | ATP synthase subunit beta, mitochondrial                               | 5  | 2 | 2 | 0 |
| Q969X5 | ERGIC1   | Endoplasmic reticulum-Golgi intermediate compartment protein 1         | 13 | 2 | 2 | 0 |
| Q7L099 | RUFY3    | Protein RUFY3                                                          | 5  | 2 | 0 | 2 |
| Q9BYW1 | SLC2A11  | Solute carrier family 2, facilitated glucose transporter member 11     | 7  | 2 | 0 | 2 |
| P55039 | DRG2     | Developmentally-regulated GTP-binding protein 2                        | 5  | 2 | 2 | 0 |
| Q86UP2 | KTN1     | Kinectin                                                               | 1  | 2 | 2 | 0 |
| Q11206 | ST3GAL4  | CMP-N-acetylneuraminic acid-6-sialyltransferase 4                      | 10 | 2 | 2 | 0 |
| O14980 | XPO1     | Exportin-1                                                             | 2  | 2 | 0 | 2 |
| Q03001 | DST      | Dystonin                                                               | 0  | 2 | 0 | 2 |
| P84098 | RPL19    | 60S ribosomal protein L19                                              | 9  | 2 | 2 | 0 |
| P49721 | PSMB2    | Proteasome subunit beta type-2                                         | 8  | 2 | 2 | 0 |
| P46782 | RPS5     | 40S ribosomal protein S5                                               | 11 | 2 | 2 | 0 |
| Q5VYK3 | ECM29    | Proteasome-associated protein ECM29 homolog                            | 1  | 2 | 2 | 0 |
| Q00839 | HNRNPU   | Heterogeneous nuclear ribonucleoprotein U                              | 5  | 2 | 2 | 0 |
| O76009 | KRT33A   | Keratin, type I cuticular Ha3-1                                        | 7  | 2 | 2 | 0 |
| P51608 | MECP2    | Methyl-CpG-binding protein 2                                           | 5  | 2 | 2 | 0 |
| Q5T749 | KPRP     | Keratinocyte proline-rich protein                                      | 4  | 2 | 2 | 0 |
| P18621 | RPL17    | 60S ribosomal protein L17                                              | 10 | 2 | 2 | 0 |
| O15144 | ARPC2    | Actin-related protein 2/3 complex subunit 2                            | 7  | 2 | 0 | 2 |
| O00264 | PGRMC1   | Membrane-associated progesterone receptor component 1                  | 28 | 2 | 2 | 0 |
| Q92520 | FAM3C    | Protein FAM3C                                                          | 13 | 2 | 2 | 0 |
| P56192 | MARS     | Methionine--tRNA ligase, cytoplasmic                                   | 3  | 2 | 0 | 2 |
| Q9BV57 | ADI1     | 1,2-dihydroxy-3-keto-5-methylthiopentene dioxygenase                   | 11 | 2 | 0 | 2 |
| Q16799 | RTN1     | Reticulon-1                                                            | 3  | 2 | 2 | 0 |
| O95715 | CXCL14   | C-X-C motif chemokine 14                                               | 10 | 2 | 0 | 2 |
| P43490 | NAMPT    | Nicotinamide phosphoribosyltransferase                                 | 10 | 2 | 2 | 0 |
| P63165 | SUMO1    | Small ubiquitin-related modifier 1                                     | 16 | 2 | 2 | 0 |
| P30419 | NMT1     | Glycylpeptide N-tetradecanoyltransferase 1                             | 4  | 2 | 2 | 0 |
